# Supplementary material for: Enantioselective radical conjugate additions driven by a photoactive intramolecular iminium-ion-based EDA complex
Source: PubMed Central journal article supplement (PMC6095928; doi:10.1038/s41467-018-05375-2), 2018-08-16
Supplement: 41467_2018_5375_MOESM1_ESM.pdf [file 41467_2018_5375_MOESM1_ESM.pdf]

Supplementary Information for

**Enantioselective Radical Conjugate Additions Driven by a Photoactive  
Intramolecular Iminium-Ion-Based EDA Complex**

Zhong-Yan Cao,<sup>1</sup> Tamal Ghosh,<sup>1</sup> Paolo Melchiorre<sup>1,2\*</sup>

1 – *ICIQ*, Institute of Chemical Research of Catalonia - the Barcelona Institute of Science and Technology, Avenida Països Catalans 16, 43007, Tarragona, Spain,

2 – *ICREA*, Catalan Institution for Research and Advanced Studies, Passeig Lluís Companys 23 – 08010, Barcelona, Spain.

\*Correspondence to: [pmelchiorre@icq.es](mailto:pmelchiorre@icq.es)

## Supplementary Figures

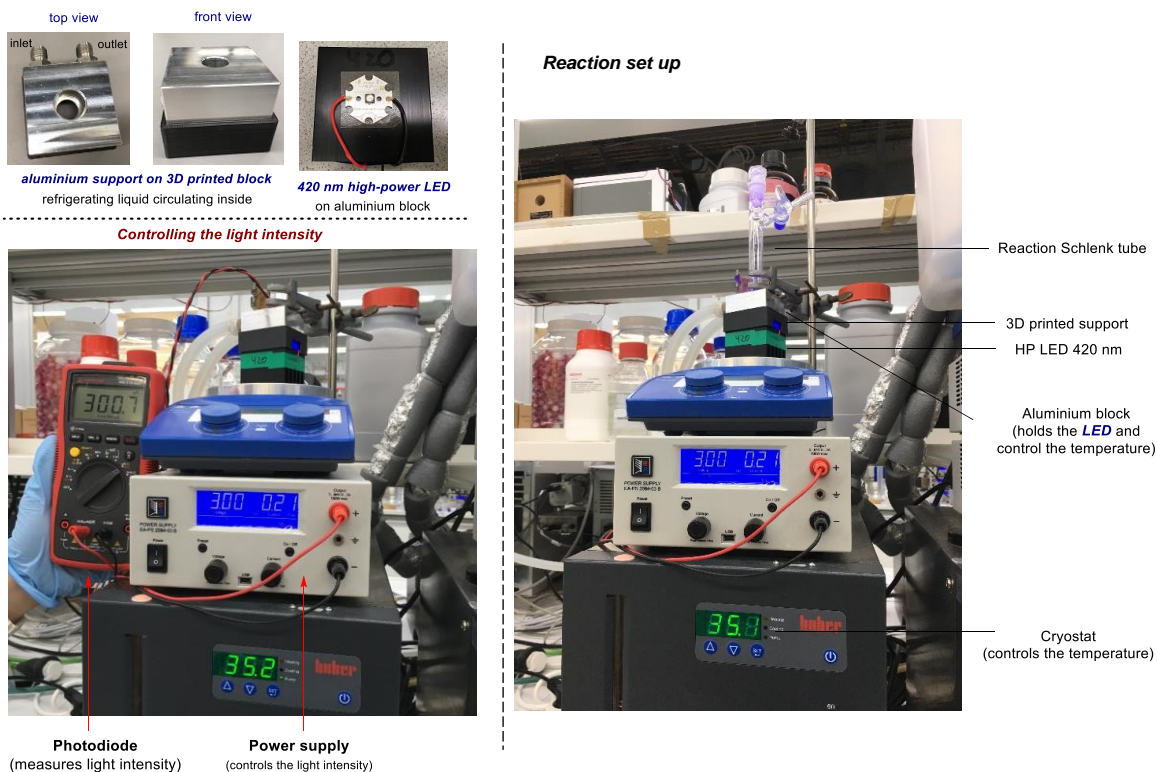

**Supplementary Figure 1.** Detailed set-up and illumination system. The light sources for illuminating the reaction vessel consisted in a 420 nm high-power single LED (OCU-440 UE420-X-T) purchased from OSA OPTO (For more information on the used LED, visit [https://www.osa-opto.com/tl\\_files/osa\\_opto/inhalte/files/datasheets/ocl-440/440\\_UE420.pdf](https://www.osa-opto.com/tl_files/osa_opto/inhalte/files/datasheets/ocl-440/440_UE420.pdf)).

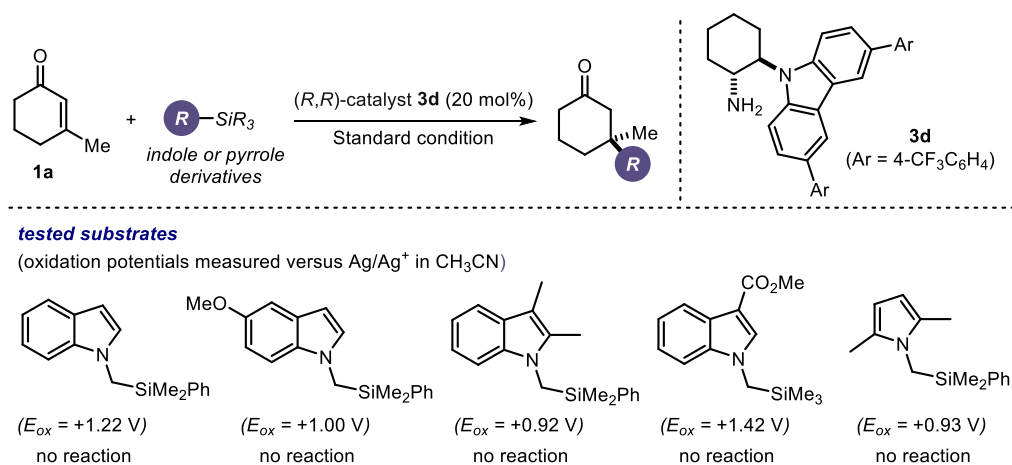

**Supplementary Figure 2.** Unsuccessful indole- or pyrrole-derived silanes tested in the photochemical reaction.

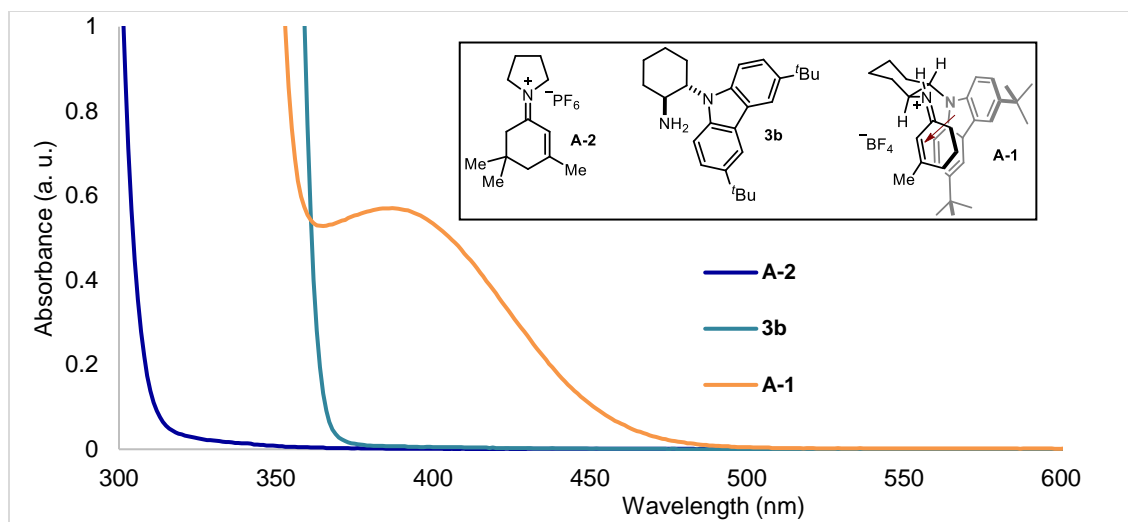

**Supplementary Figure 3.** UV-vis absorption spectra of iminium ion **A-2**, **A-1** and the carbazole catalyst **3b** (1.0 mM in  $\text{CH}_3\text{CN}$ ). The preparation and full characterization of the iminium ion **A-1** was reported in previous literature.<sup>1</sup>

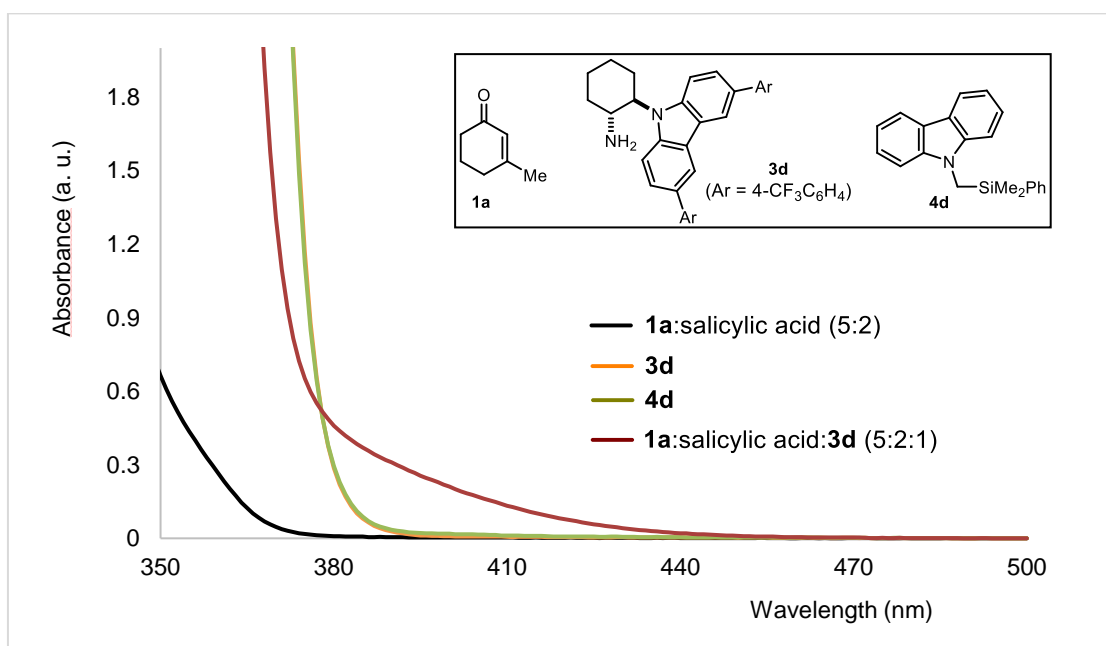

**Supplementary Figure 4.** UV-vis absorption spectra of the reaction mixture and the individual components, recorded in  $\text{CH}_3\text{CN}$ ;  $[\mathbf{1a}] = 0.5 \text{ M}$ ;  $[\mathbf{3d}] = 0.1 \text{ M}$ ;  $[\text{salicylic acid}] = 0.2 \text{ M}$ ;  $[\mathbf{4d}] = 0.75 \text{ M}$ . None of the individual reaction components can absorb in the visible region. However, the *in situ* formed iminium ion, generated upon condensation of enone **1a** and the carbazole amine catalyst **3d** in the presence of salicylic acid, can absorb in the visible region (magenta line).

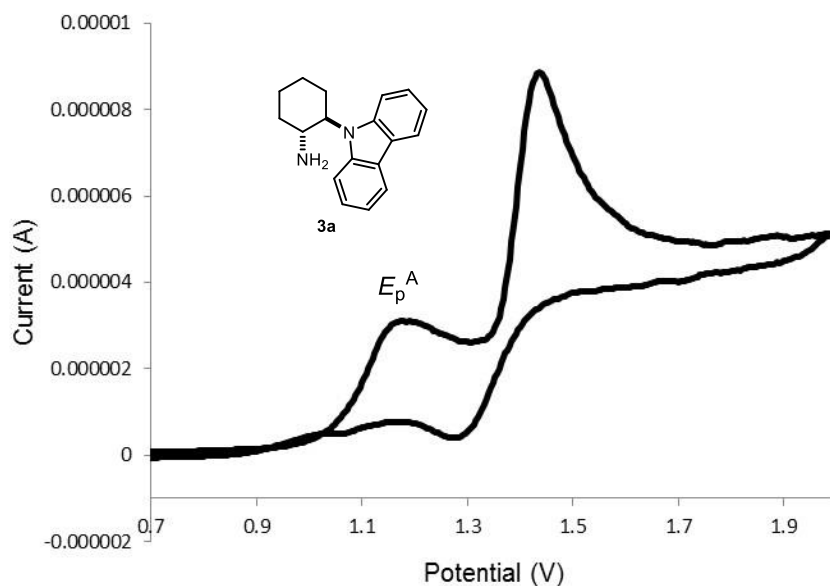

**Supplementary Figure 5.** Cyclic voltammogram of catalyst **3a** [0.001 M] in [0.1 M] TBAPF<sub>6</sub> in CH<sub>3</sub>CN. Sweep rate: 10 mV/s. Pt electrode working electrode, Ag/AgCl (NaCl saturated) reference electrode, Pt wire auxiliary electrode. Irreversible oxidation peak,  $E_p^A = E_{ox} = +1.15$  V;  $E_p^A$  is the anodic peak potential, which has been used to describe the electrochemical properties ( $E_{ox}$ ) of the carbazole moiety within catalyst **3a**.

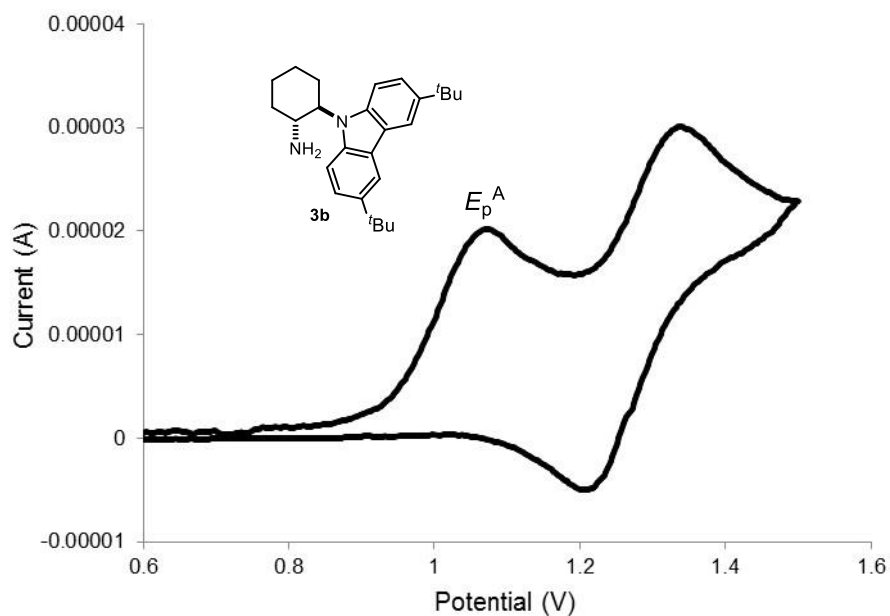

**Supplementary Figure 6.** Cyclic voltammogram of catalyst **3b** [0.001 M] in [0.1 M] TBAPF<sub>6</sub> in CH<sub>3</sub>CN. Sweep rate: 10 mV/s. Pt electrode working electrode, Ag/AgCl (NaCl saturated) reference electrode, Pt wire auxiliary electrode. Irreversible oxidation peak,  $E_p^A = E_{ox} = +1.05$  V;  $E_p^A$  is the anodic peak potential, which has been used to describe the electrochemical properties ( $E_{ox}$ ) of the carbazole moiety within catalyst **3b**.

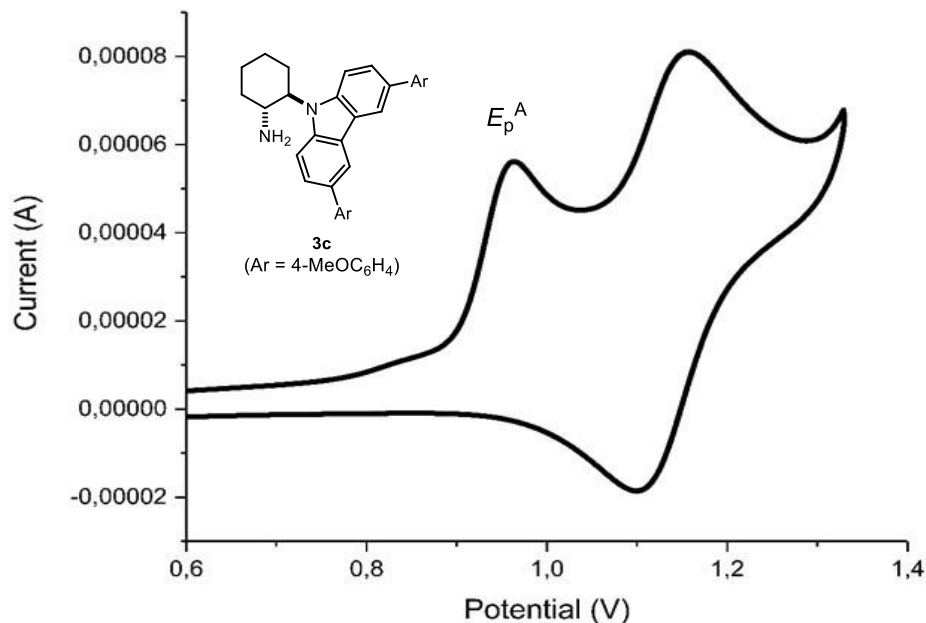

**Supplementary Figure 7.** Cyclic voltammogram of the catalyst **3c** [0.001 M] in [0.1 M] TBAPF<sub>6</sub> in CH<sub>3</sub>CN. Sweep rate: 100 mV/s. Pt electrode working electrode, Ag/AgCl (NaCl saturated) reference electrode, Pt wire auxiliary electrode. Irreversible oxidation peak,  $E_p^A = E_{ox} = +0.96$  V;  $E_p^A$  is the anodic peak potential, which has been used to describe the electrochemical properties ( $E_{ox}$ ) of the carbazole moiety within catalyst **3c**.

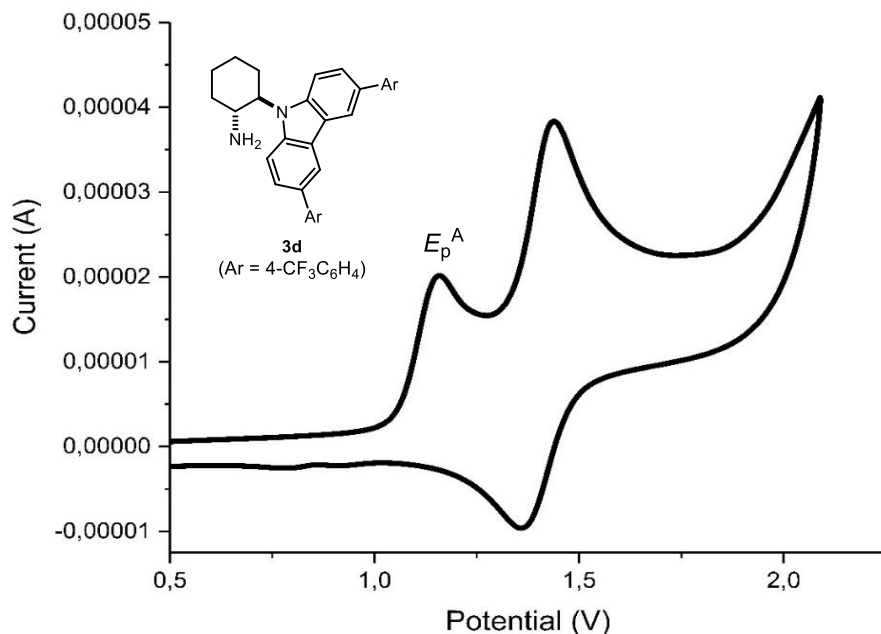

**Supplementary Figure 8.** Cyclic voltammogram of catalyst **3d** [0.001 M] in [0.1 M] TBAPF<sub>6</sub> in CH<sub>3</sub>CN. Sweep rate: 100 mV/s. Pt electrode working electrode, Ag/AgCl (NaCl saturated) reference electrode, Pt wire auxiliary electrode. Irreversible oxidation peak,  $E_p^A = E_{ox} = +1.16$  V;  $E_p^A$  is the anodic peak potential, which has been used to describe the electrochemical properties ( $E_{ox}$ ) of the carbazole moiety within catalyst **3d**.

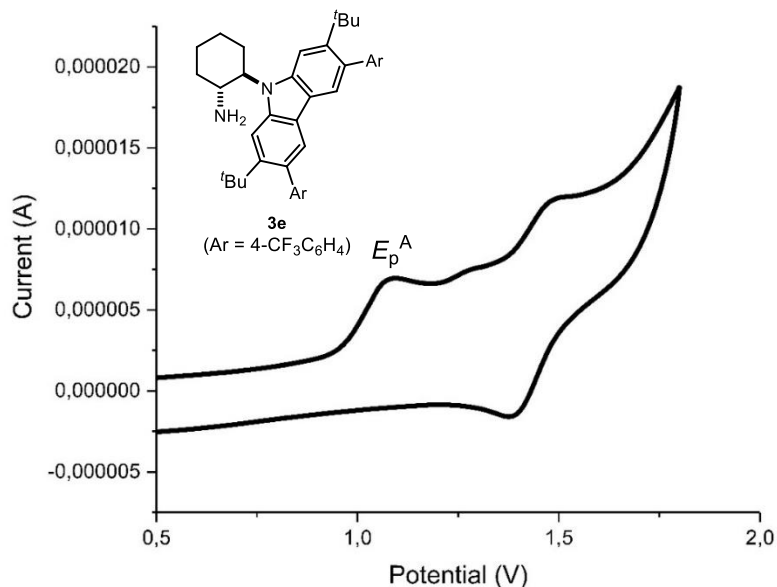

**Supplementary Figure 9.** Cyclic voltammogram of the catalyst **3e** [0.001 M] in [0.1 M] TBAPF<sub>6</sub> in CH<sub>3</sub>CN. Sweep rate: 100 mV/s. Pt electrode working electrode, Ag/AgCl (NaCl saturated) reference electrode, Pt wire auxiliary electrode. Irreversible oxidation peak,  $E_p^A = E_{ox} = +1.09$  V;  $E_p^A$  is the anodic peak potential, which has been used to describe the electrochemical properties ( $E_{ox}$ ) of the carbazole moiety within catalyst **3e**.

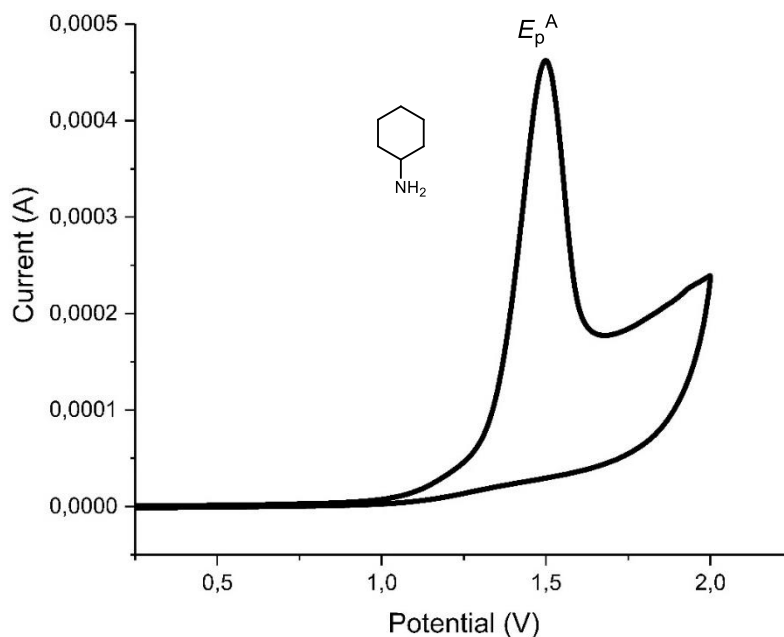

**Supplementary Figure 10.** Cyclic voltammogram of cyclohexylamine [0.001 M] in [0.1 M] TBAPF<sub>6</sub> in CH<sub>3</sub>CN. Sweep rate: 100 mV/s. Pt electrode working electrode, Ag/AgCl (NaCl saturated) reference electrode, Pt wire auxiliary electrode. Irreversible oxidation peak,  $E_p^A = E_{ox} = +1.49$  V;  $E_p^A$  is the anodic peak potential, which has been used to describe the electrochemical properties ( $E_{ox}$ ) of cyclohexylamine. This indicates that the second oxidation event in the voltammogram of the carbazole catalysts **3** is ascribable to the primary amine oxidation (irreversible oxidation at about +1.5 V, see Supplementary Figures 5-9).

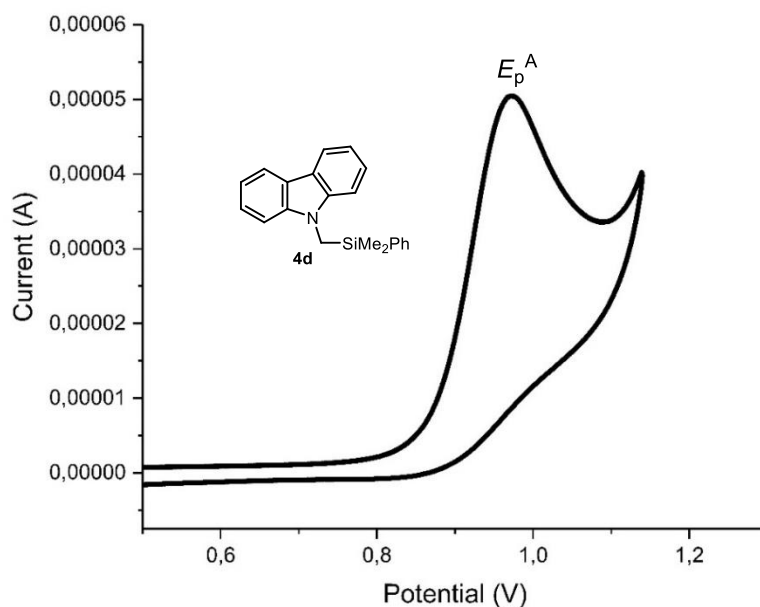

**Supplementary Figure 11.** Cyclic voltammogram of the  $\alpha$ -carbazole substituted silane **4d** [0.001 M] in [0.1 M] TBAPF<sub>6</sub> in CH<sub>3</sub>CN. Sweep rate: 100 mV/s. Pt electrode working electrode, Ag/AgCl (NaCl saturated) reference electrode, Pt wire auxiliary electrode. Irreversible oxidation peak,  $E_p^A = E_{ox} = +0.97$  V;  $E_p^A$  is the anodic peak potential, while  $E_{ox}$  value describes the electrochemical properties of **4d**.

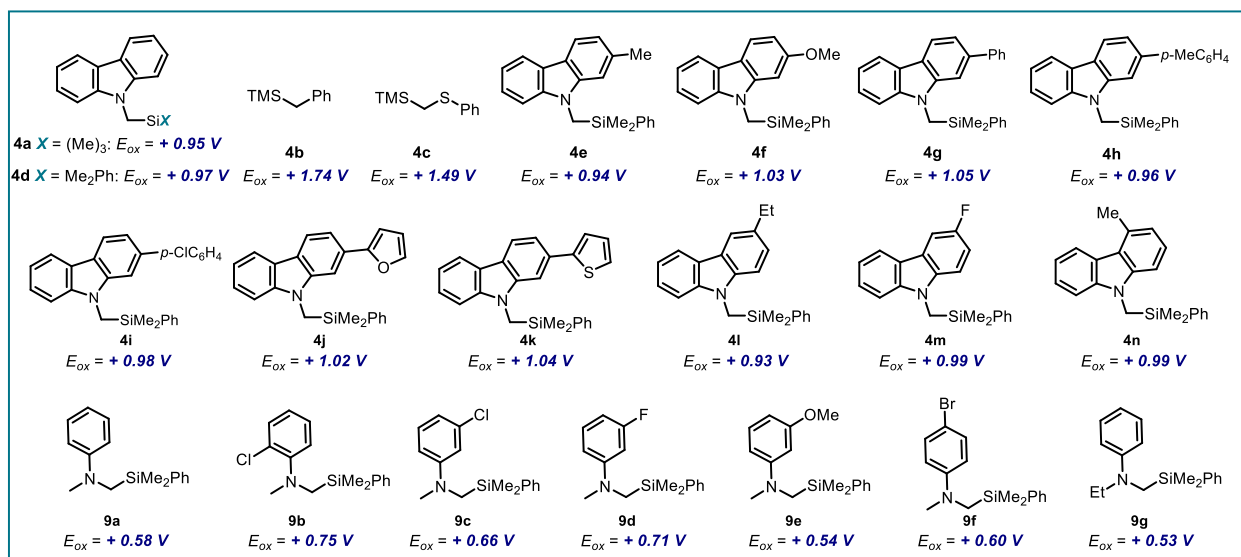

**Supplementary Figure 12.** Oxidation potentials of the organic silanes used in this study. All the oxidation potentials are given as  $E_{ox}$  vs Ag/Ag<sup>+</sup> in CH<sub>3</sub>CN and they have been measured by cyclic voltammetry, following the same method described in Supplementary Figure 11.

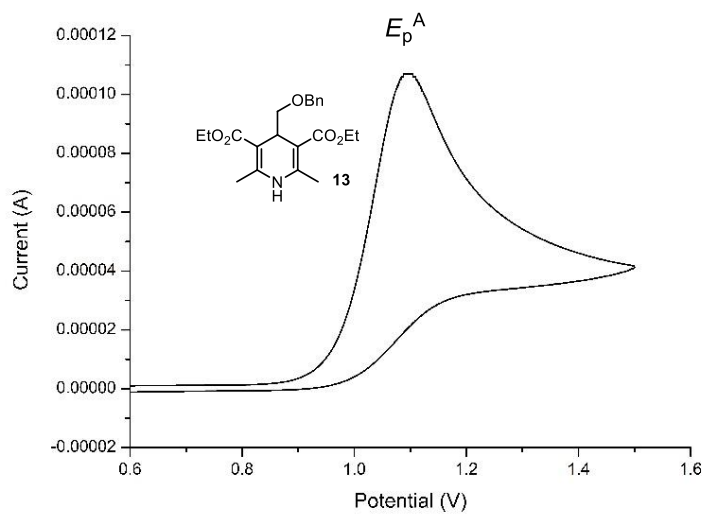

**Supplementary Figure 13.** Cyclic voltammogram of **13** [0.001 M] in [0.1 M] TBAPF<sub>6</sub> in CH<sub>3</sub>CN. Sweep rate: 100 mV/s. Pt electrode working electrode, Ag/AgCl (NaCl saturated) reference electrode, Pt wire auxiliary electrode. Irreversible oxidation peak,  $E_p^A = E_{ox} = +1.08$  V;  $E_p^A$  is the anodic peak potential, while  $E_{ox}$  value describes the electrochemical properties of **13**.



$^1\text{H}$  NMR (500MHz,  $\text{CDCl}_3$ )

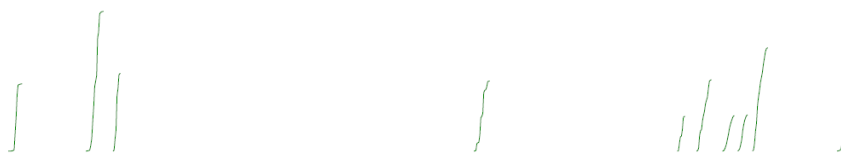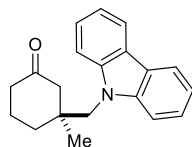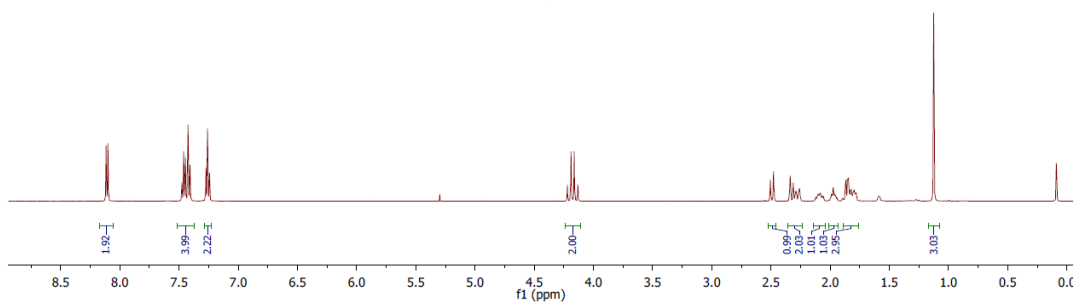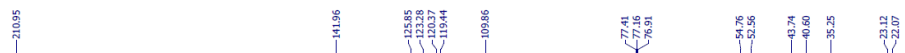

$^{13}\text{C}$  NMR (126MHz,  $\text{CDCl}_3$ )

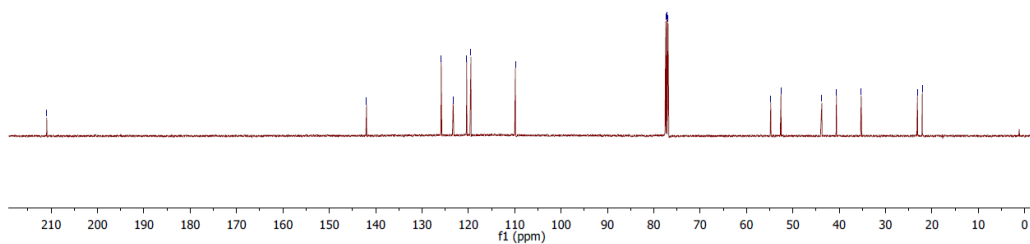

**Supplementary Figure 14.**  $^1\text{H}$  and  $^{13}\text{C}$  NMR spectra for compound 2a

$^1\text{H}$  NMR (500MHz,  $\text{CDCl}_3$ )

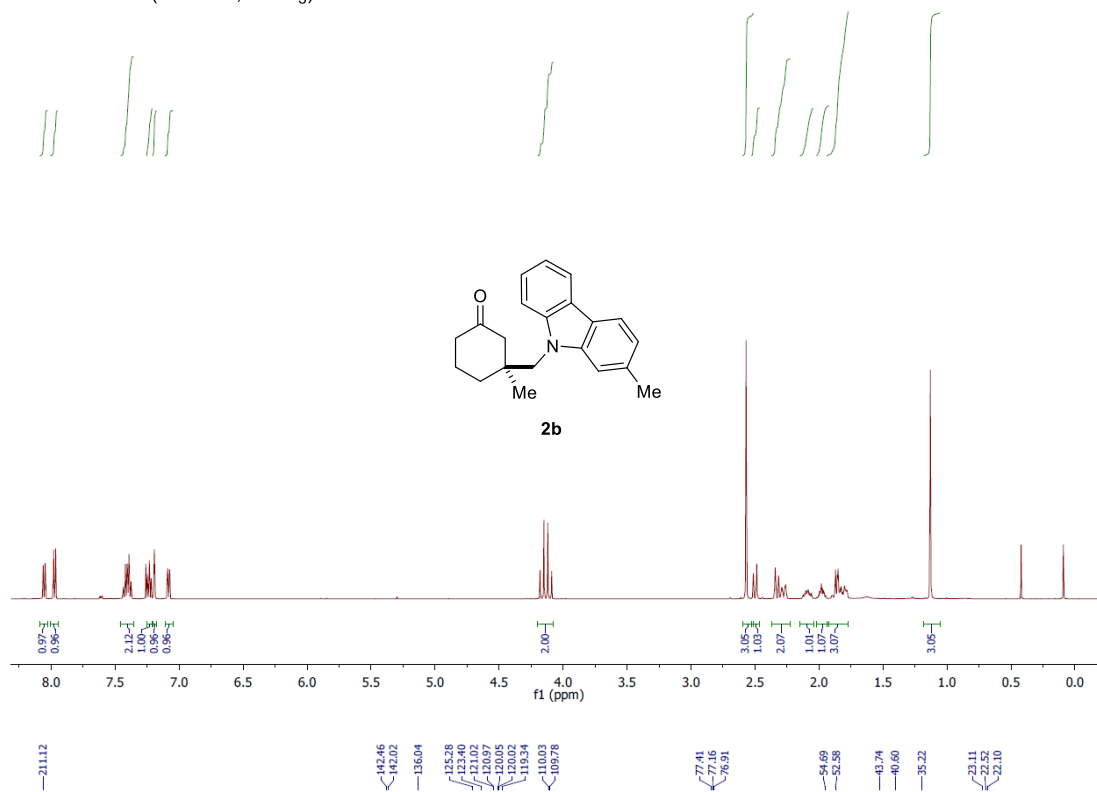

$^{13}\text{C}$  NMR (126MHz,  $\text{CDCl}_3$ )

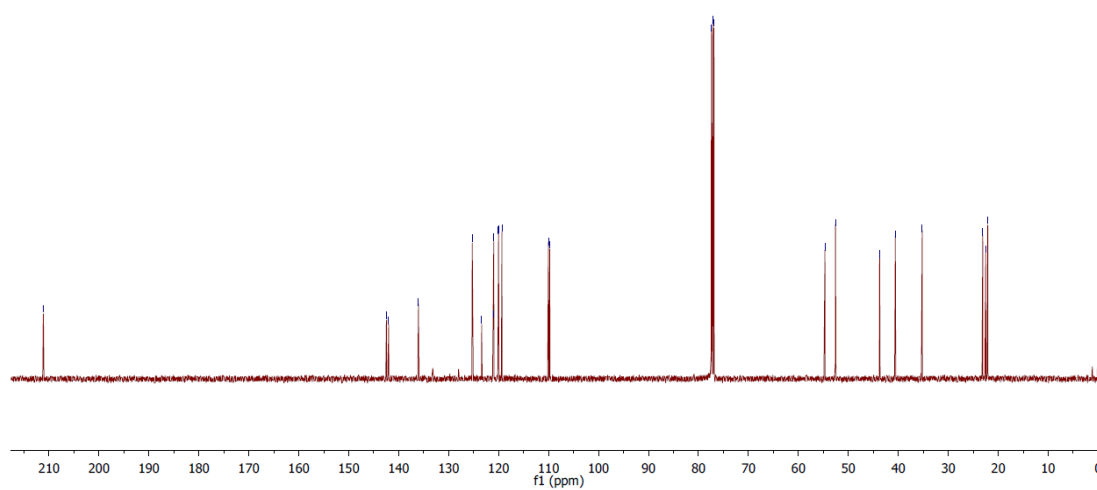

Supplementary Figure 15.  $^1\text{H}$  and  $^{13}\text{C}$  NMR spectra for compound **2b**

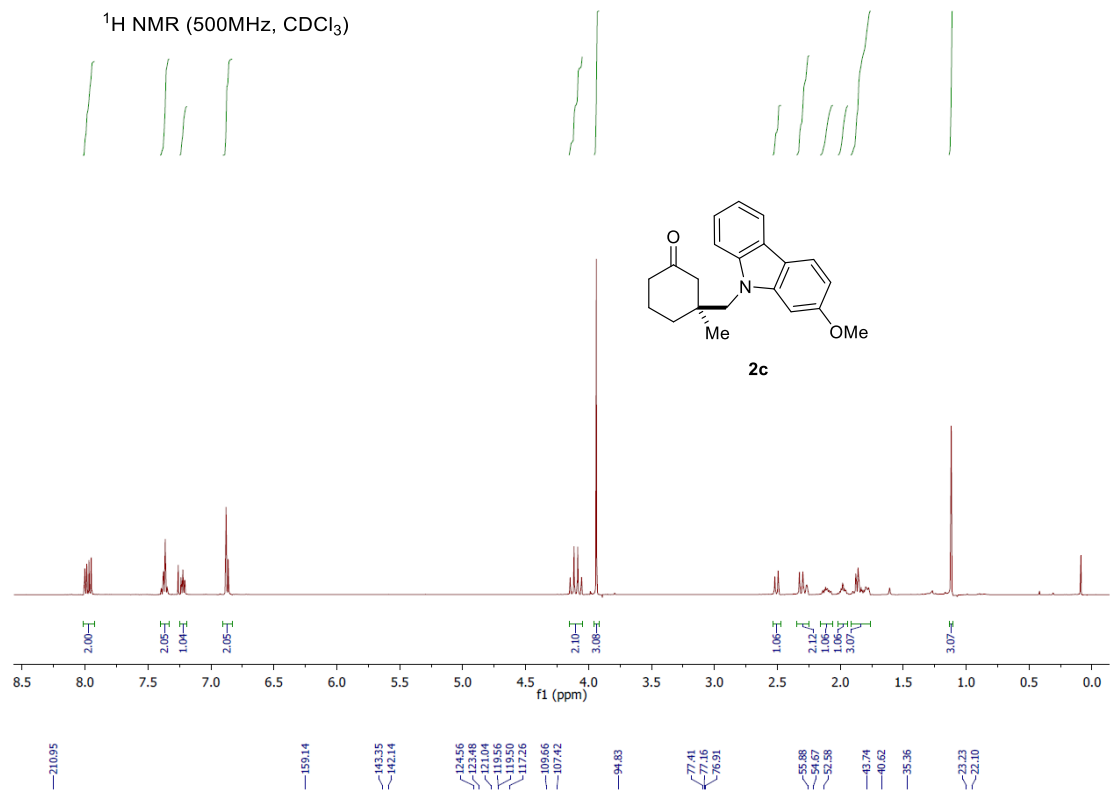

Supplementary Figure 16. <sup>1</sup>H and <sup>13</sup>C NMR spectra for compound **2c**

$^1\text{H}$  NMR (500MHz,  $\text{CDCl}_3$ )

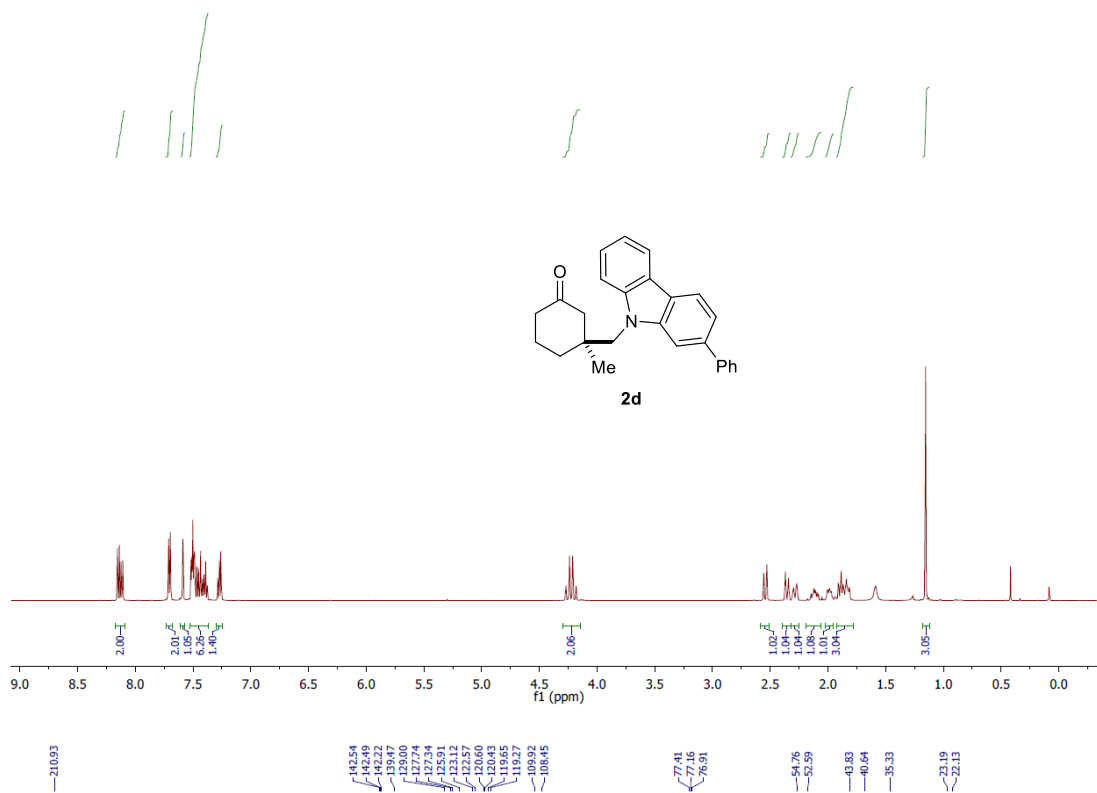

$^{13}\text{C}$  NMR (126MHz,  $\text{CDCl}_3$ )

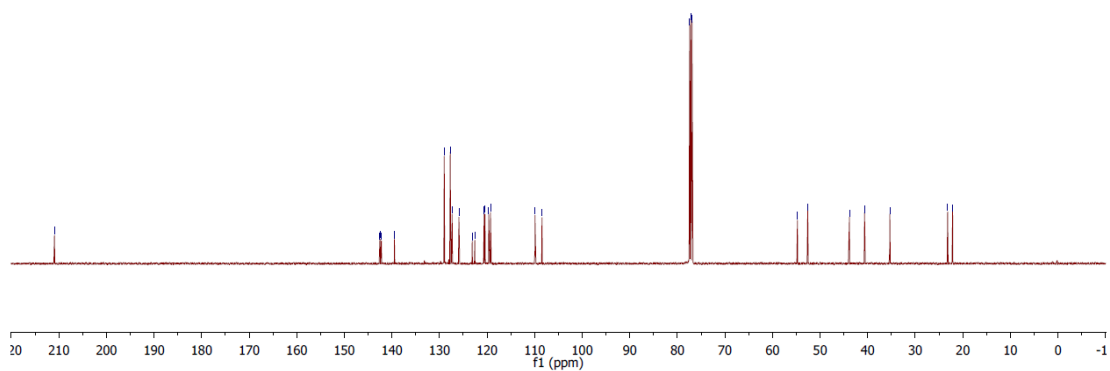

Supplementary Figure 17.  $^1\text{H}$  and  $^{13}\text{C}$  NMR spectra for compound **2d**

$^1\text{H}$  NMR (500MHz,  $\text{CDCl}_3$ )

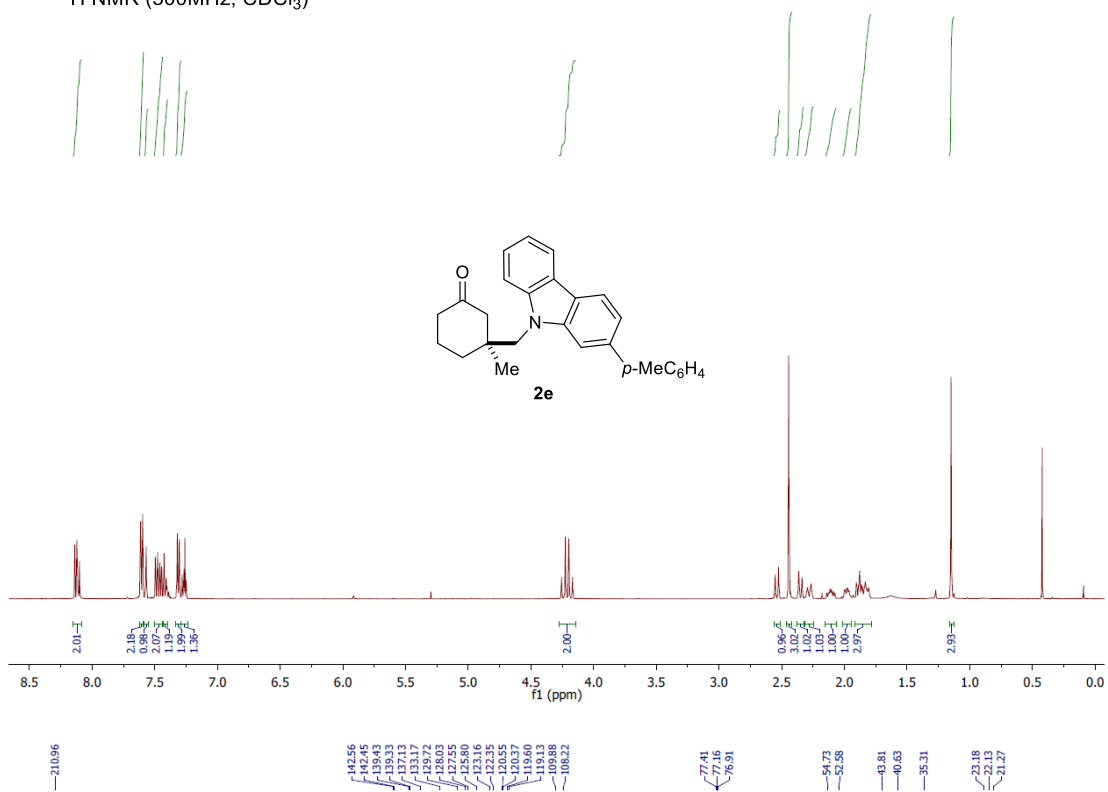

$^{13}\text{C}$  NMR (126MHz,  $\text{CDCl}_3$ )

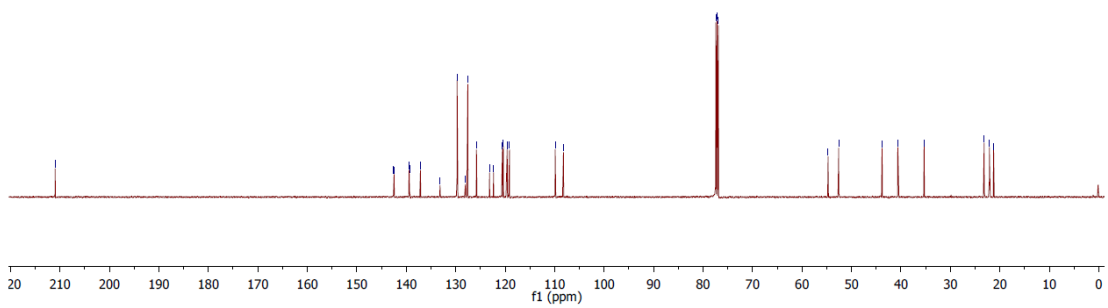

Supplementary Figure 18.  $^1\text{H}$  and  $^{13}\text{C}$  NMR spectra for compound **2e**

<sup>1</sup>H NMR (500MHz, CDCl<sub>3</sub>)

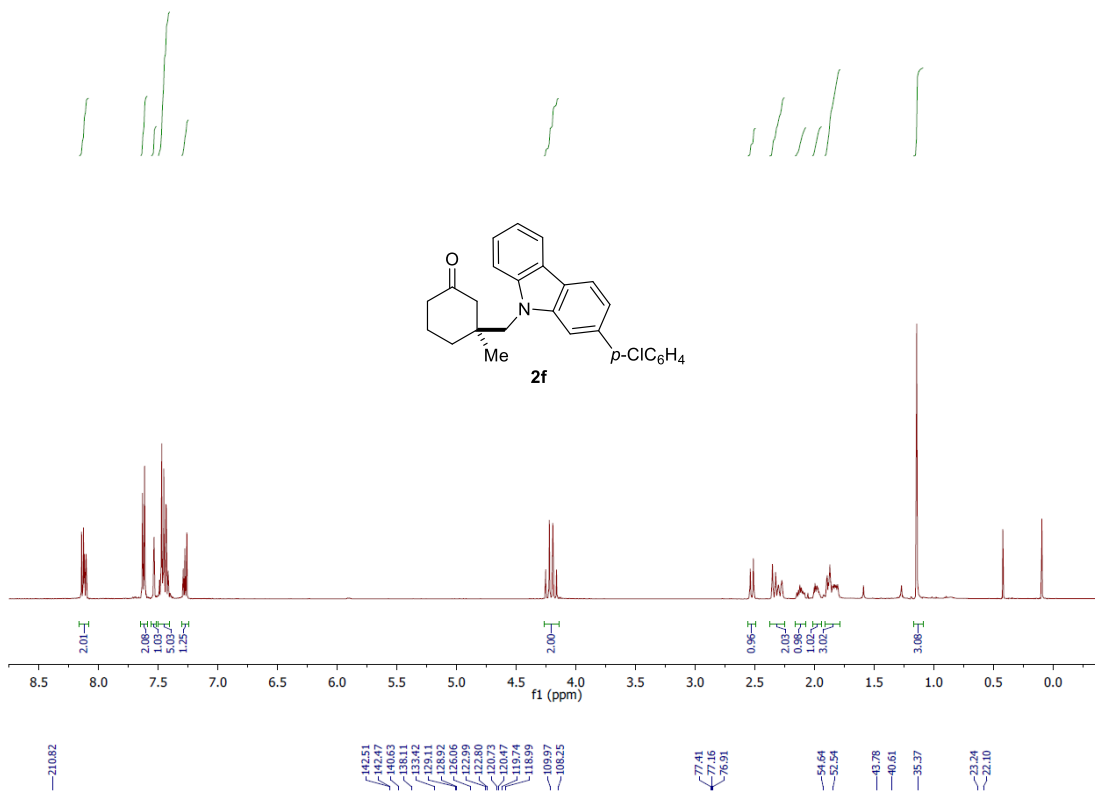

<sup>13</sup>C NMR (126MHz, CDCl<sub>3</sub>)

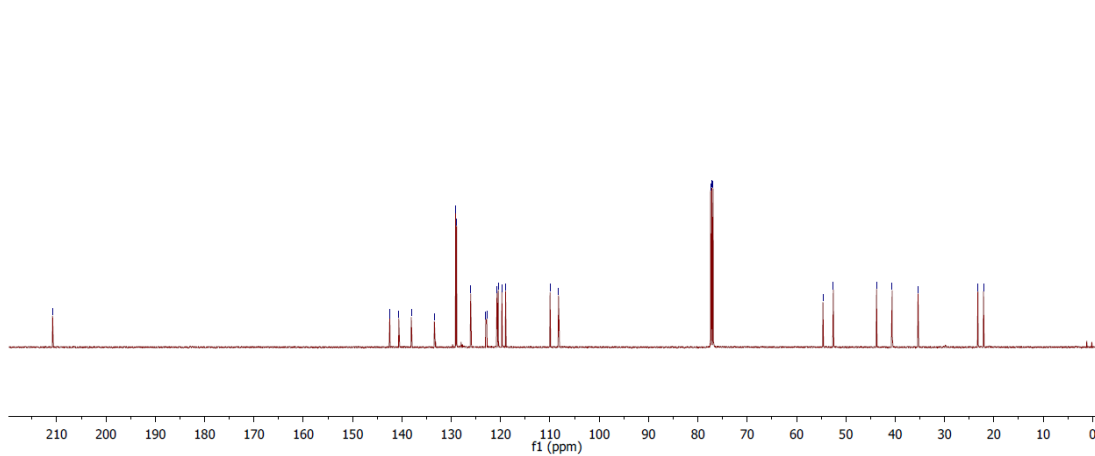

Supplementary Figure 19. <sup>1</sup>H and <sup>13</sup>C NMR spectra for compound **2f**

$^1\text{H}$  NMR (500MHz,  $\text{CDCl}_3$ )

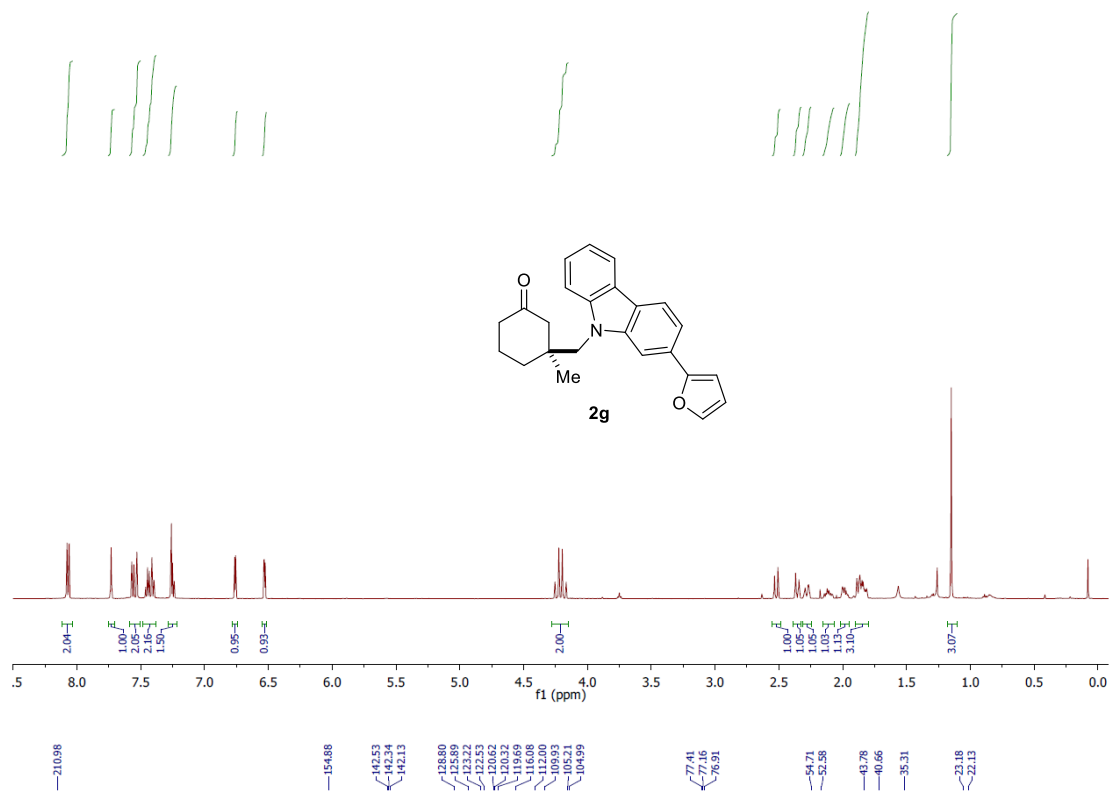

$^{13}\text{C}$  NMR (126MHz,  $\text{CDCl}_3$ )

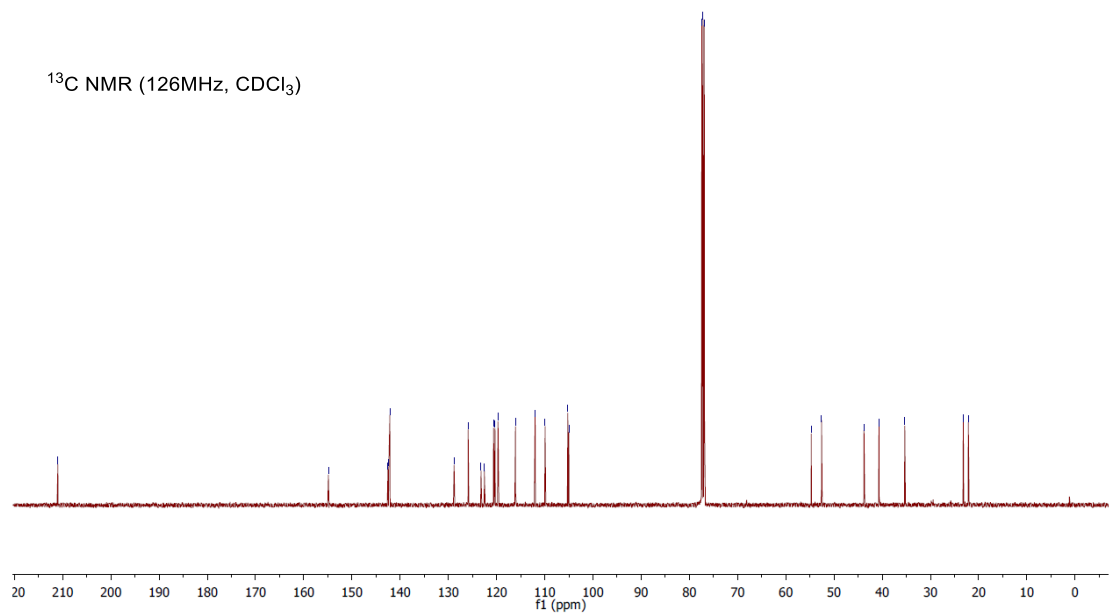

Supplementary Figure 20.  $^1\text{H}$  and  $^{13}\text{C}$  NMR spectra for compound **2g**

$^1\text{H}$  NMR (500MHz,  $\text{CDCl}_3$ )

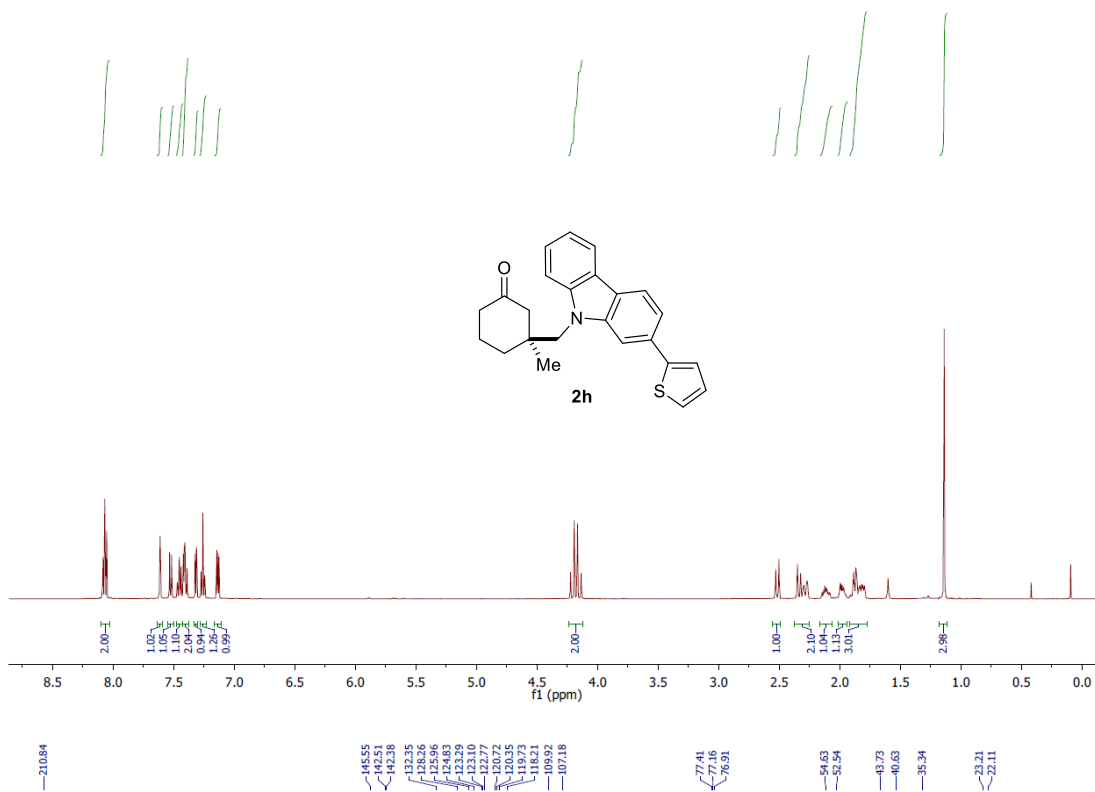

$^{13}\text{C}$  NMR (126MHz,  $\text{CDCl}_3$ )

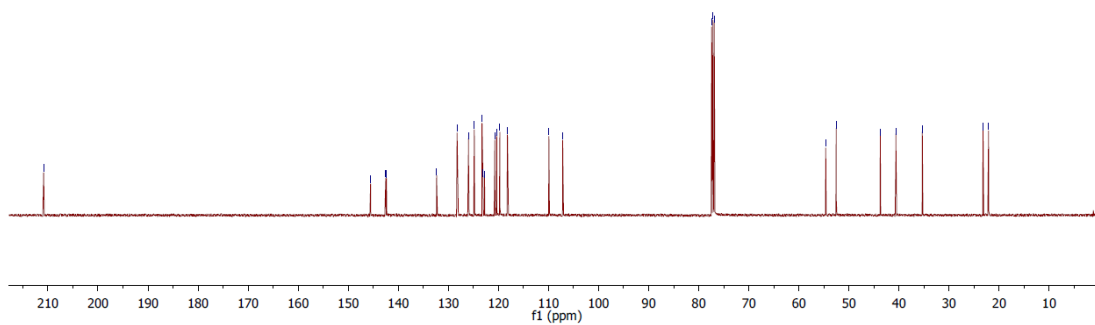

Supplementary Figure 21.  $^1\text{H}$  and  $^{13}\text{C}$  NMR spectra for compound **2h**



$^1\text{H}$  NMR (500MHz,  $\text{CDCl}_3$ )

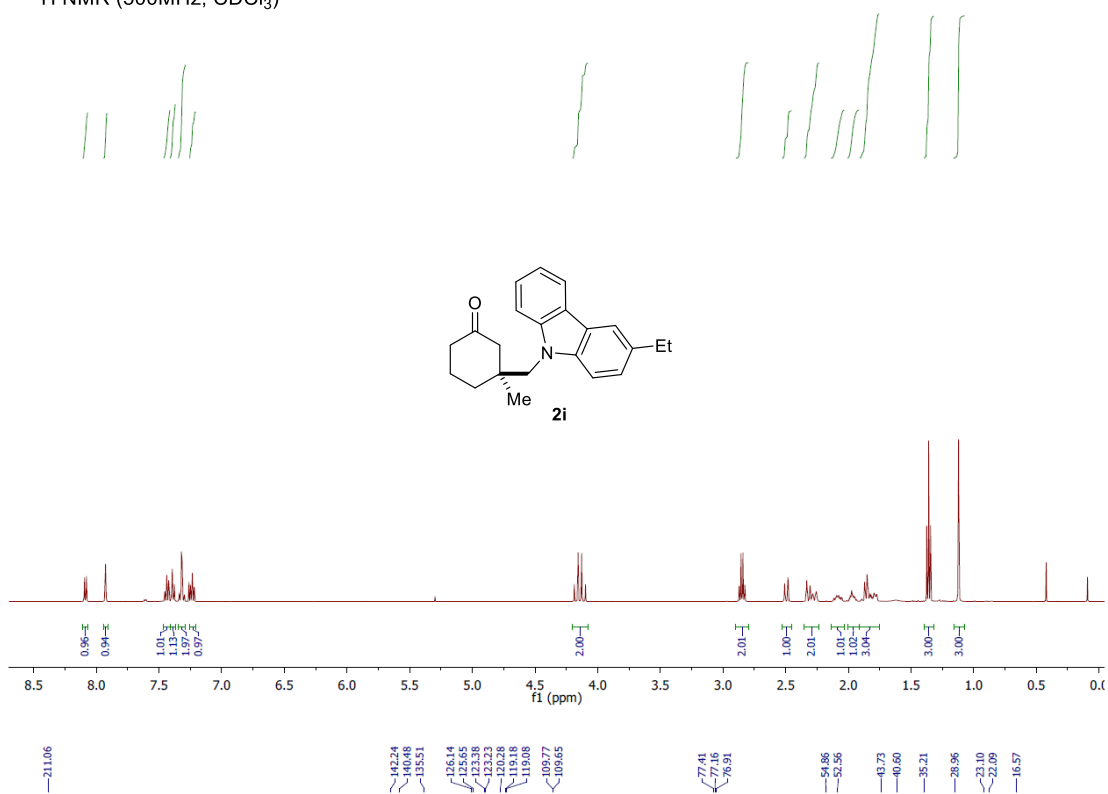

$^{13}\text{C}$  NMR (126MHz,  $\text{CDCl}_3$ )

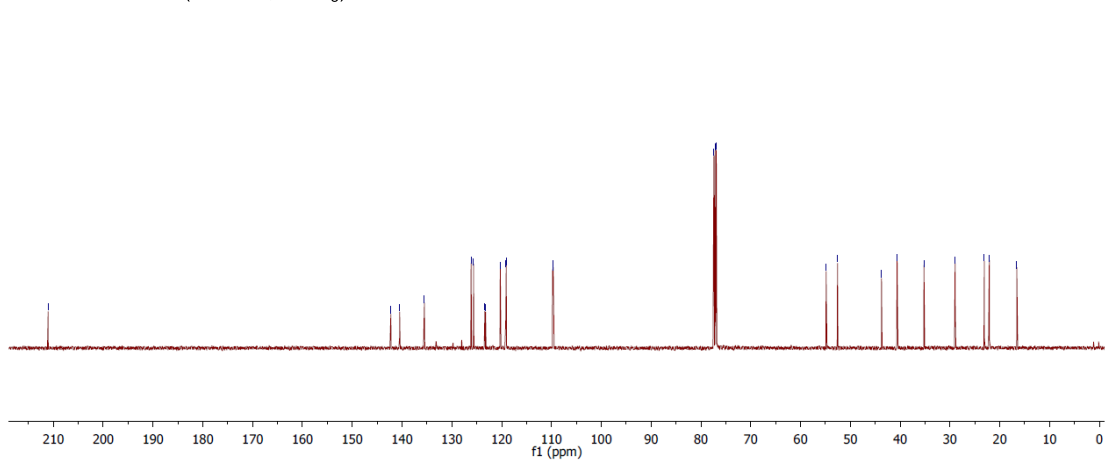

Supplementary Figure 22.  $^1\text{H}$  and  $^{13}\text{C}$  NMR spectra for compound **2i**

$^1\text{H}$  NMR (500MHz,  $\text{CDCl}_3$ )

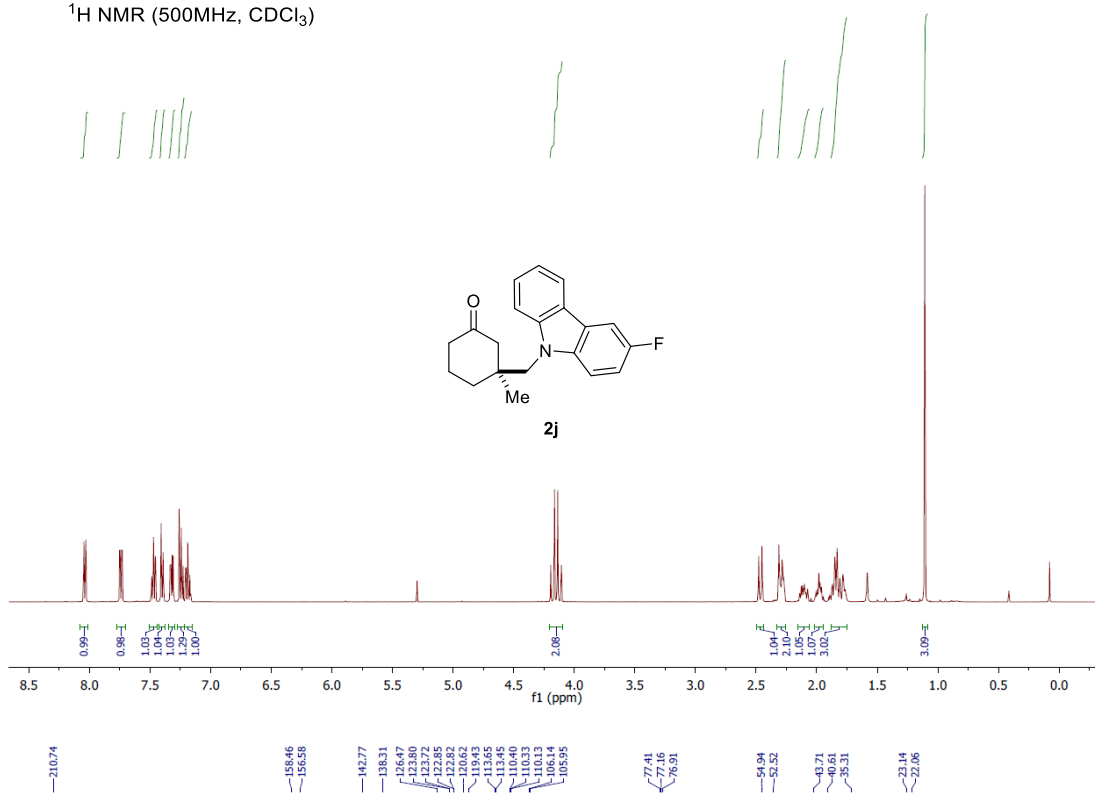

$^{13}\text{C}$  NMR (126MHz,  $\text{CDCl}_3$ )

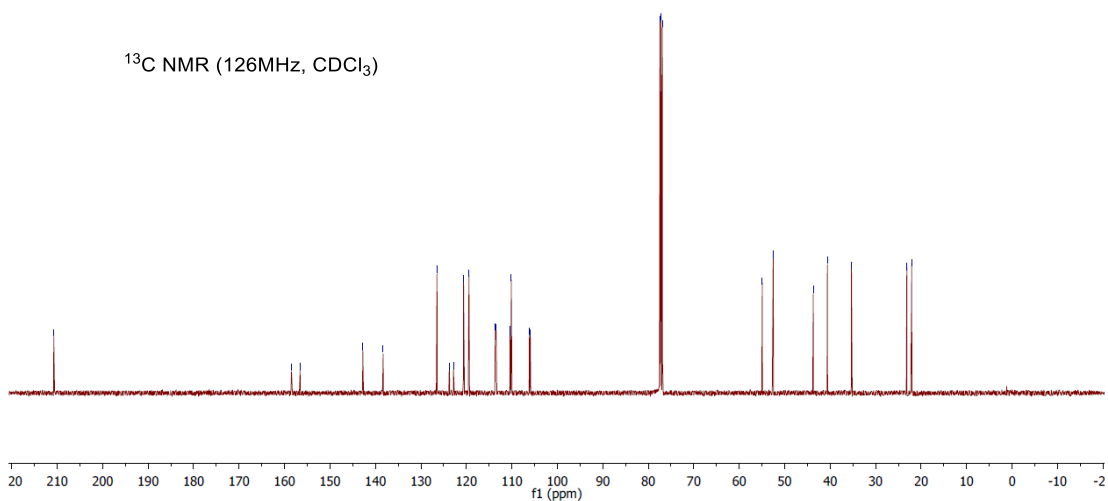

Supplementary Figure 23.  $^1\text{H}$  and  $^{13}\text{C}$  NMR spectra for compound **2j**

$^1\text{H}$  NMR (500MHz,  $\text{CDCl}_3$ )

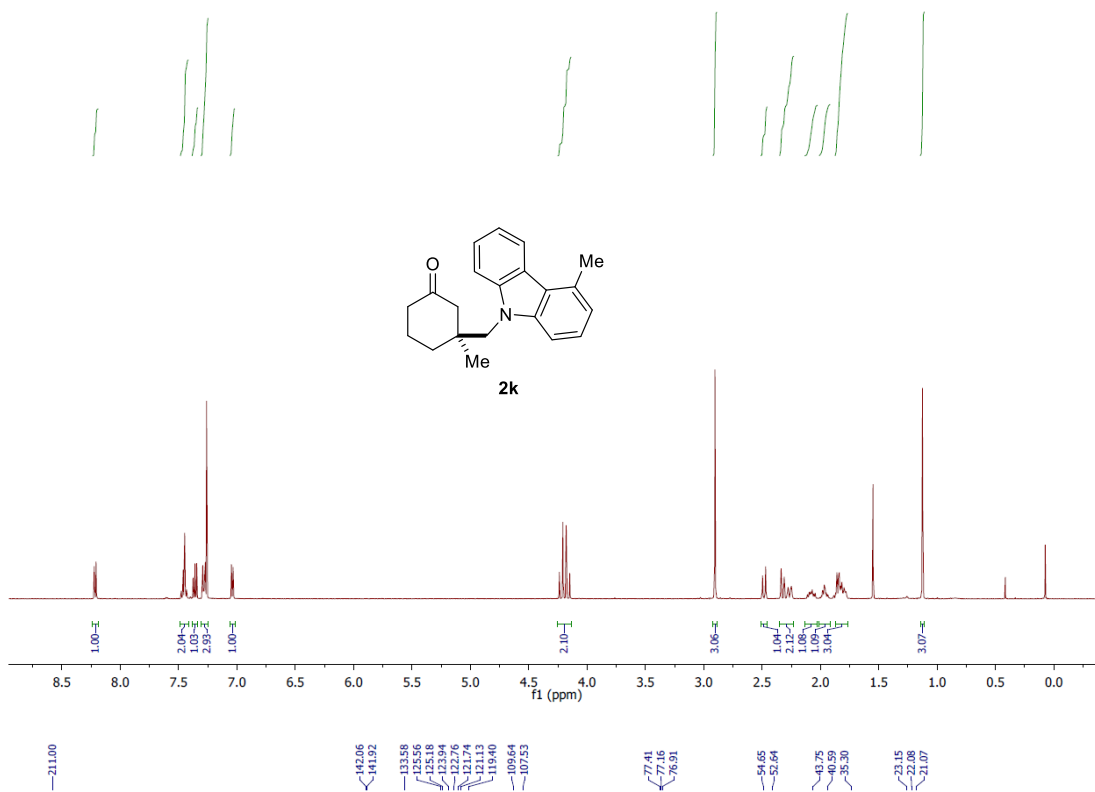

$^{13}\text{C}$  NMR (126MHz,  $\text{CDCl}_3$ )

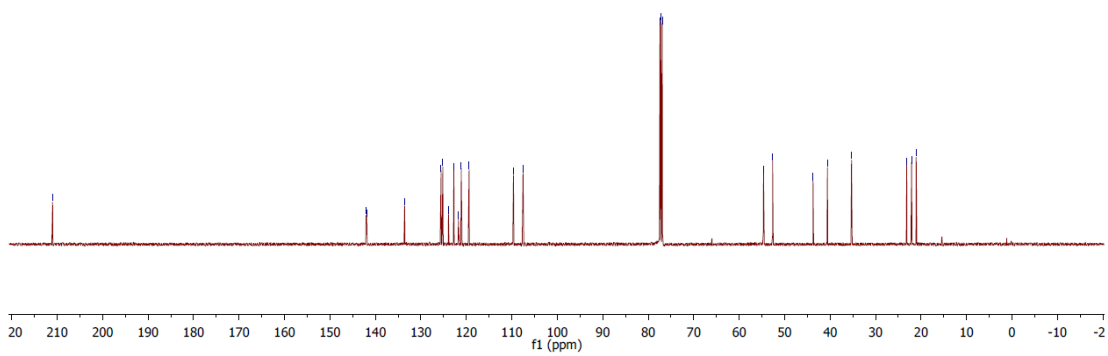

Supplementary Figure 24.  $^1\text{H}$  and  $^{13}\text{C}$  NMR spectra for compound **2k**

$^1\text{H}$  NMR (500MHz,  $\text{CDCl}_3$ )

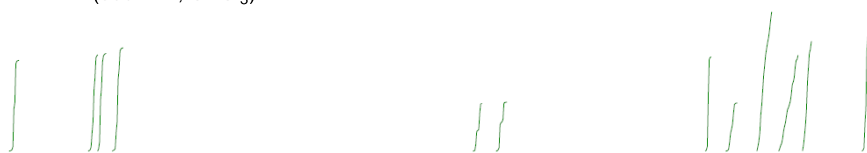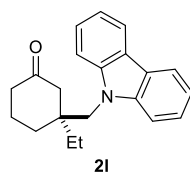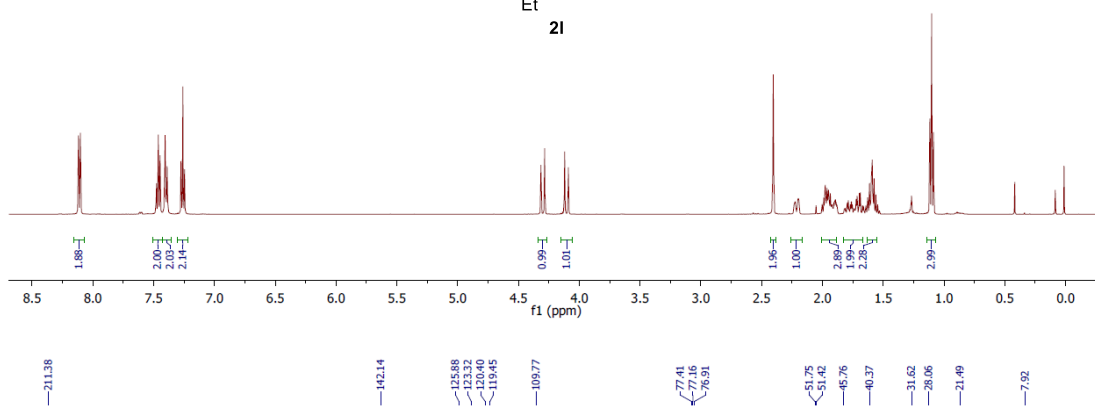

$^{13}\text{C}$  NMR (126MHz,  $\text{CDCl}_3$ )

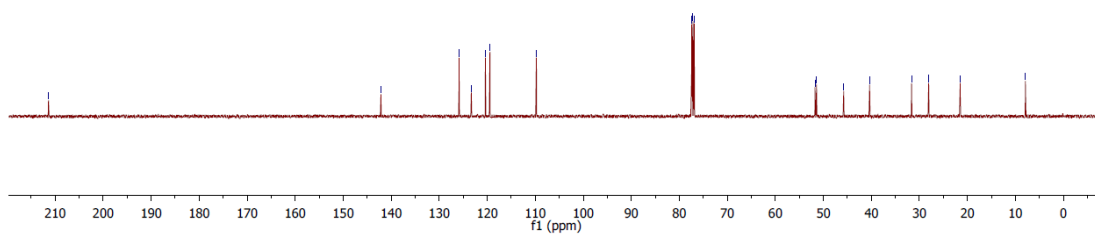

**Supplementary Figure 25.**  $^1\text{H}$  and  $^{13}\text{C}$  NMR spectra for compound **21**

$^1\text{H}$  NMR (500MHz,  $\text{CDCl}_3$ )

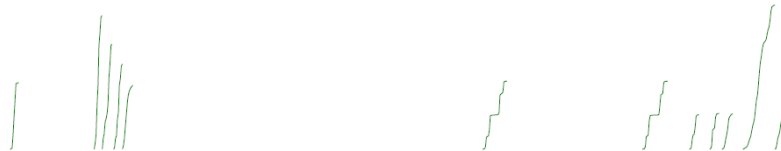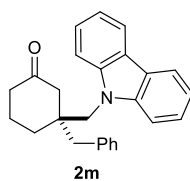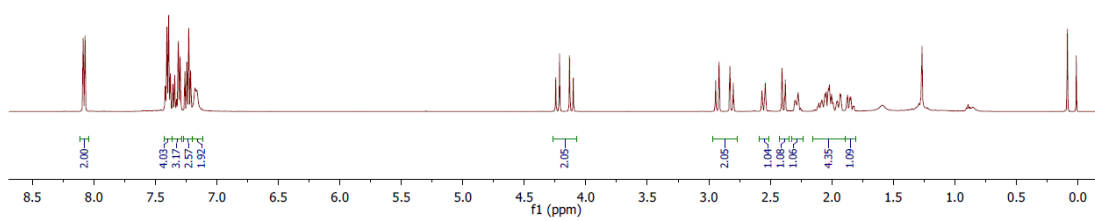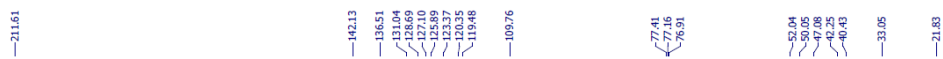

$^{13}\text{C}$  NMR (126MHz,  $\text{CDCl}_3$ )

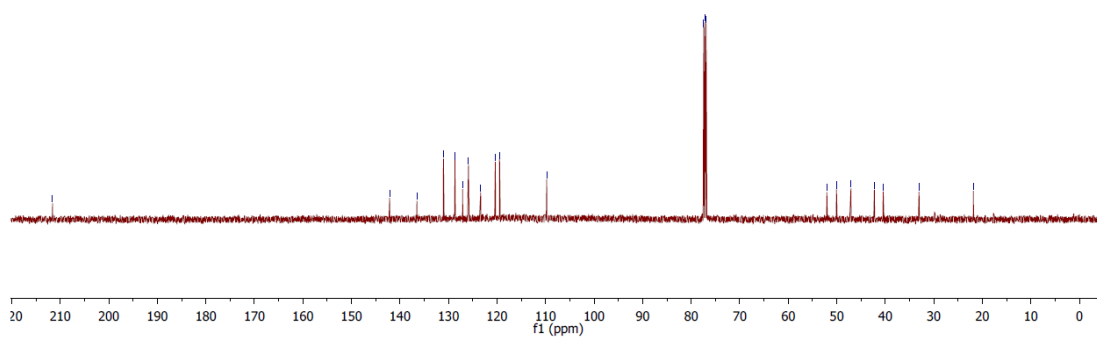

Supplementary Figure 26.  $^1\text{H}$  and  $^{13}\text{C}$  NMR spectra for compound **2m**

$^1\text{H}$  NMR (500MHz,  $\text{CDCl}_3$ )

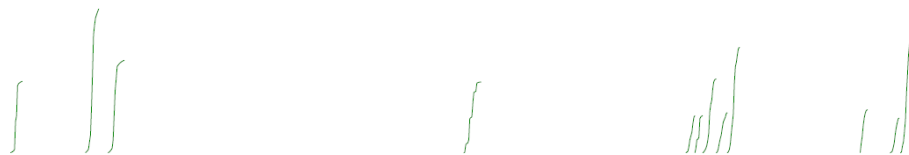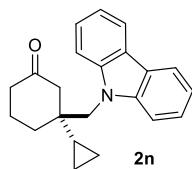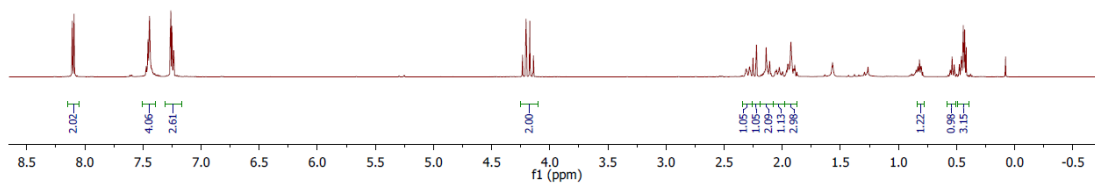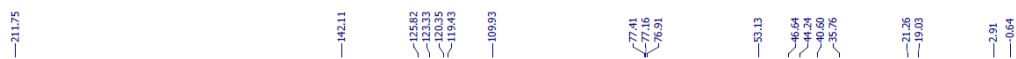

$^{13}\text{C}$  NMR (126MHz,  $\text{CDCl}_3$ )

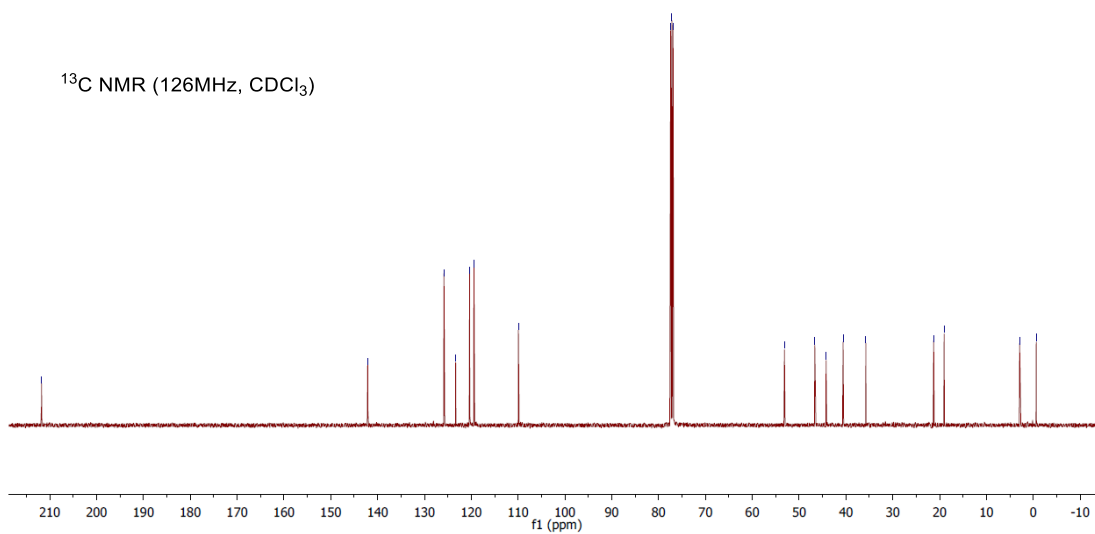

Supplementary Figure 27.  $^1\text{H}$  and  $^{13}\text{C}$  NMR spectra for compound **2n**

$^1\text{H}$  NMR (500MHz,  $\text{CDCl}_3$ )

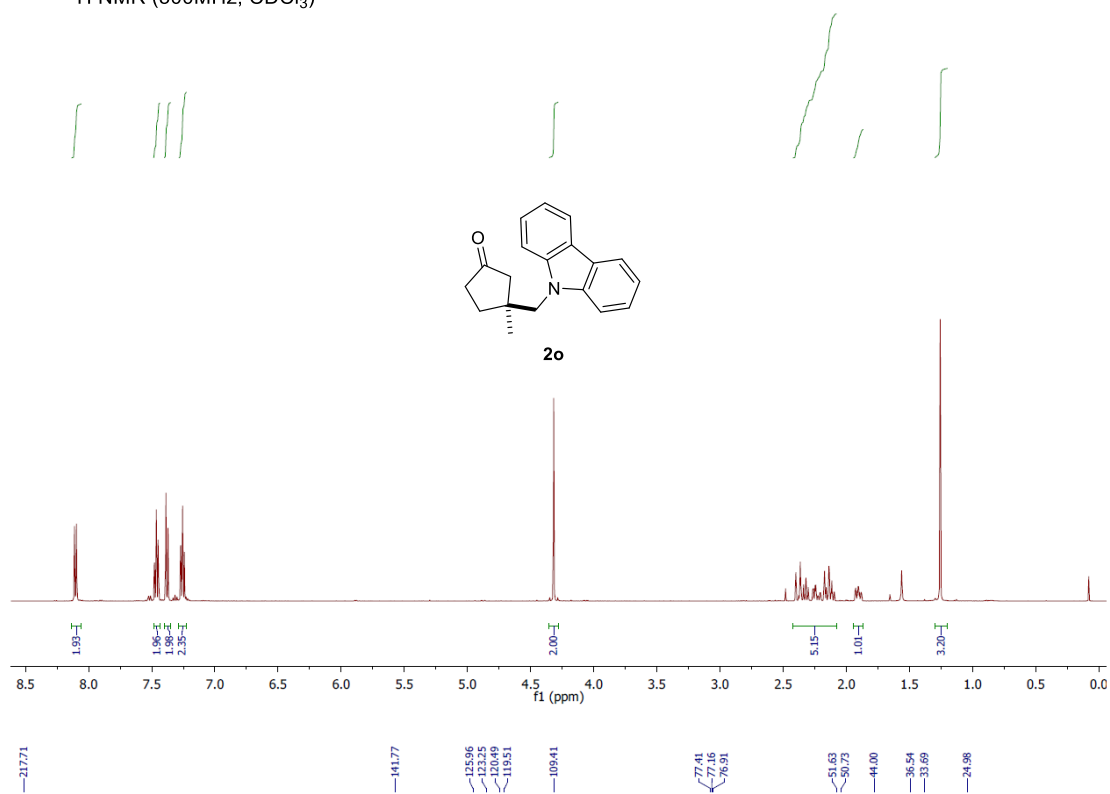

$^{13}\text{C}$  NMR (126MHz,  $\text{CDCl}_3$ )

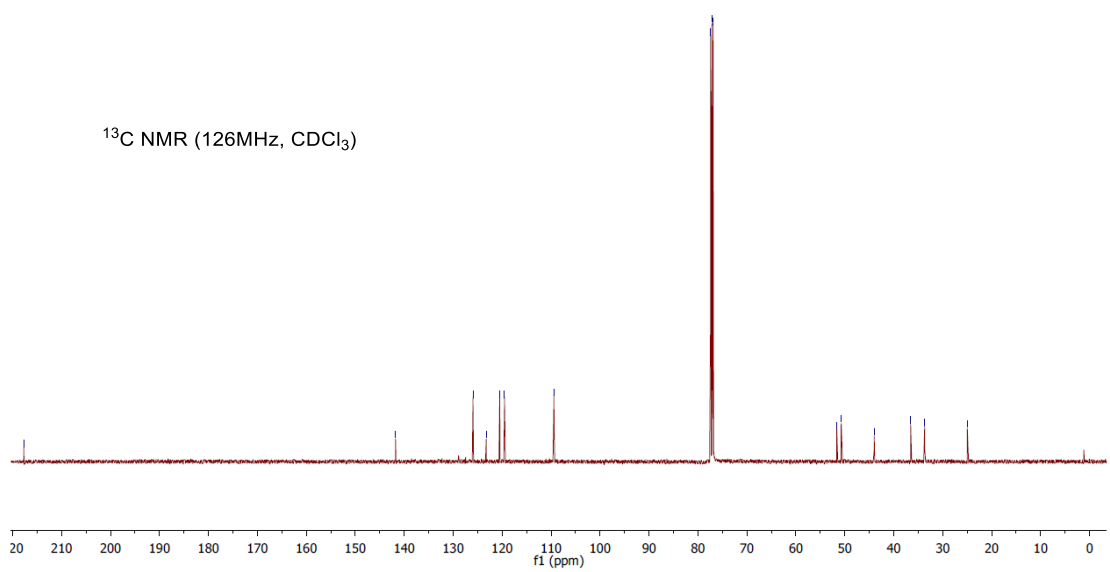

Supplementary Figure 28.  $^1\text{H}$  and  $^{13}\text{C}$  NMR spectra for compound **2o**

$^1\text{H}$  NMR (500MHz,  $\text{CDCl}_3$ )

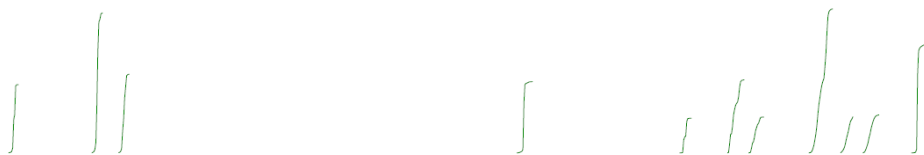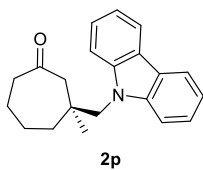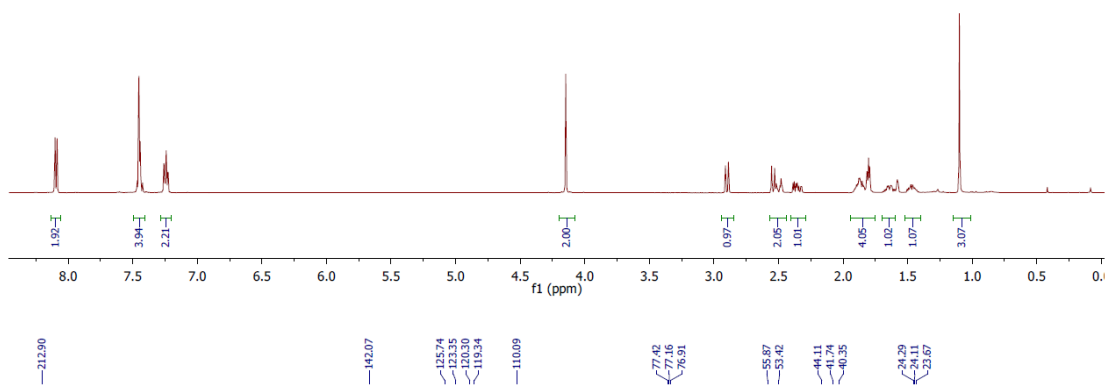

$^{13}\text{C}$  NMR (126MHz,  $\text{CDCl}_3$ )

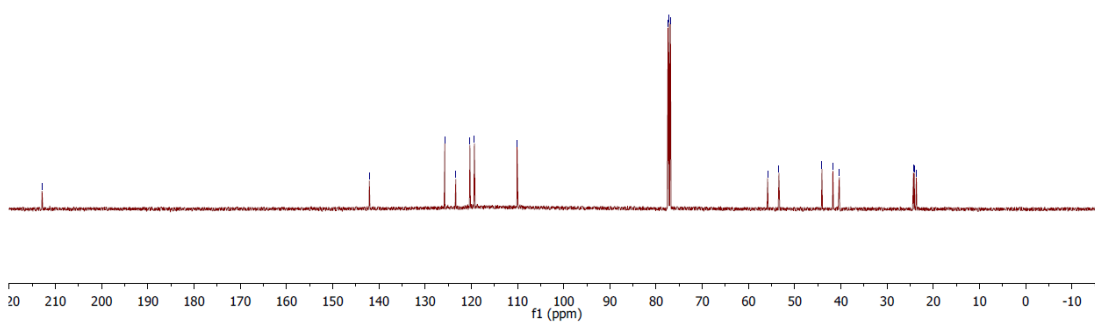

**Supplementary Figure 29.**  $^1\text{H}$  and  $^{13}\text{C}$  NMR spectra for compound **2p**



$^1\text{H}$  NMR (300MHz,  $\text{CDCl}_3$ )

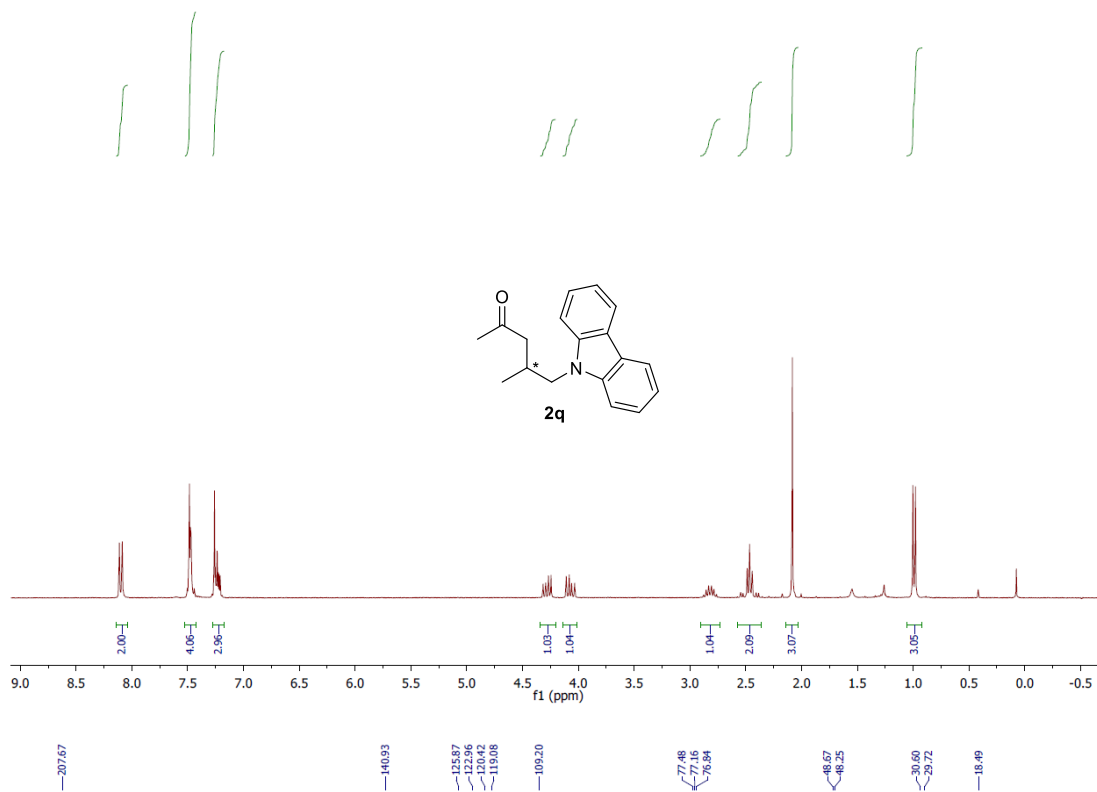

$^{13}\text{C}$  NMR (101MHz,  $\text{CDCl}_3$ )

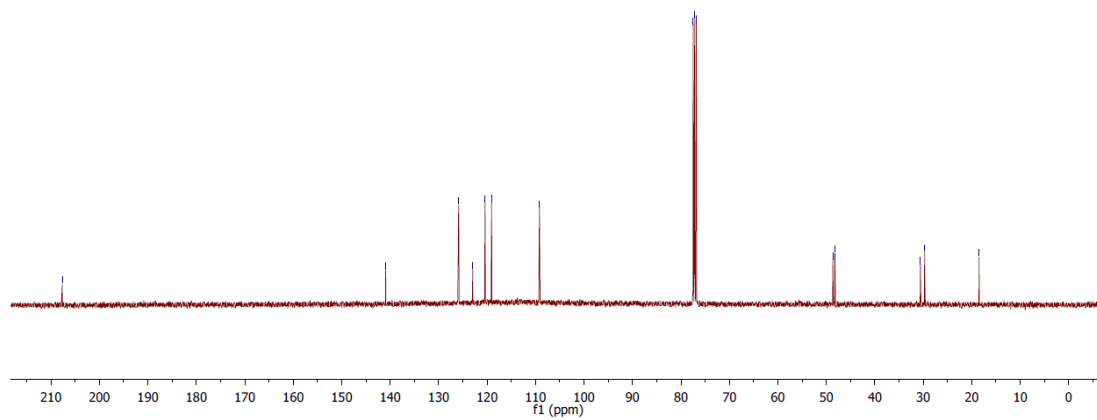

Supplementary Figure 30.  $^1\text{H}$  and  $^{13}\text{C}$  NMR spectra for compound **2q**

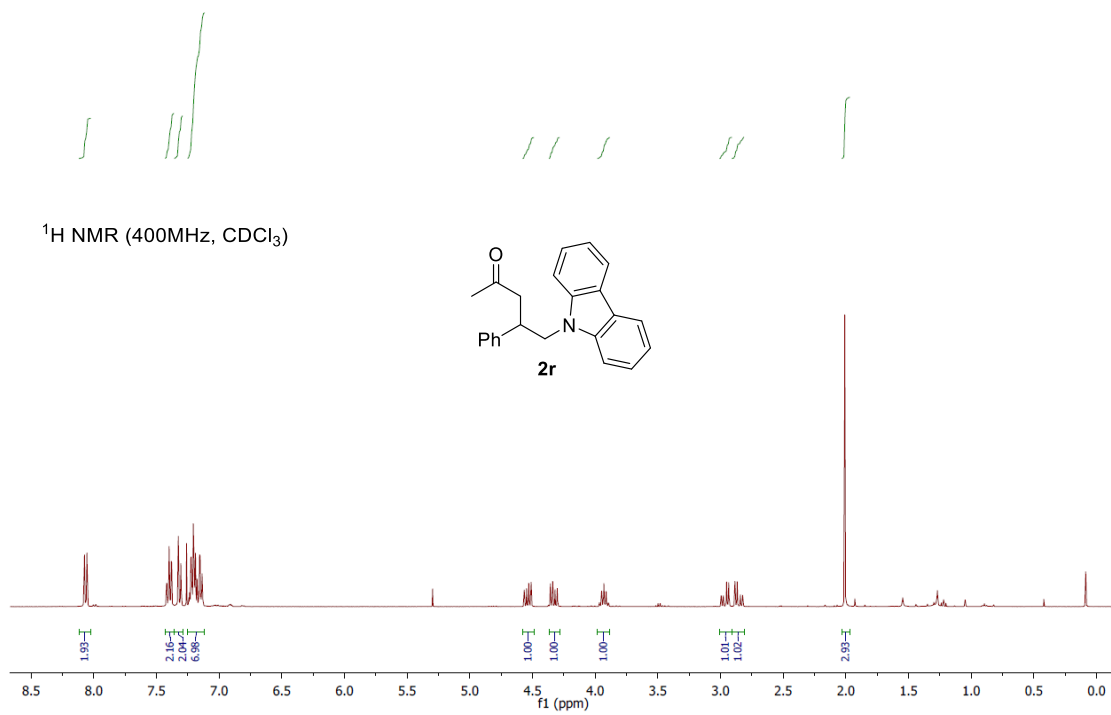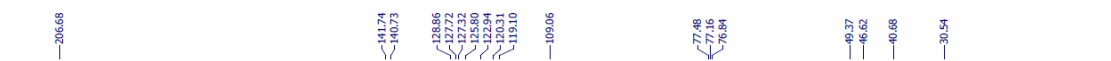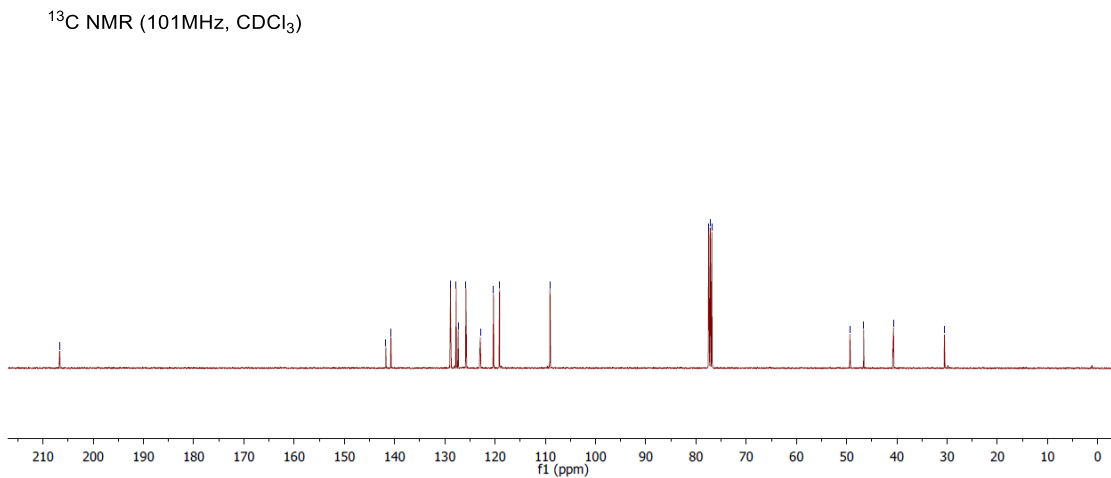

Supplementary Figure 31. <sup>1</sup>H and <sup>13</sup>C NMR spectra for compound **2r**

$^1\text{H}$  NMR (500MHz,  $\text{CDCl}_3$ )

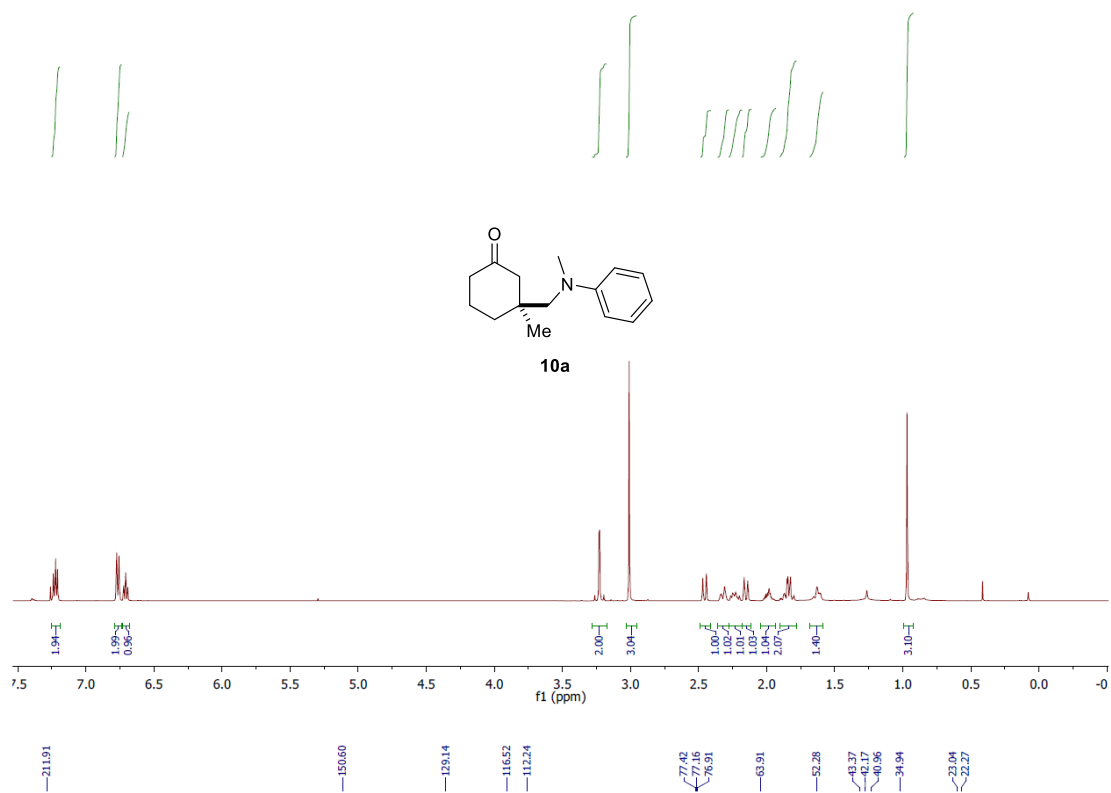

$^{13}\text{C}$  NMR (126MHz,  $\text{CDCl}_3$ )

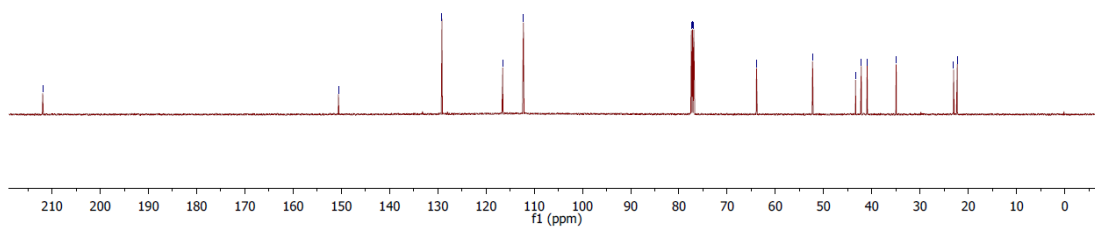

**Supplementary Figure 32.**  $^1\text{H}$  and  $^{13}\text{C}$  NMR spectra for compound **10a**

<sup>1</sup>H NMR (500MHz, CDCl<sub>3</sub>)

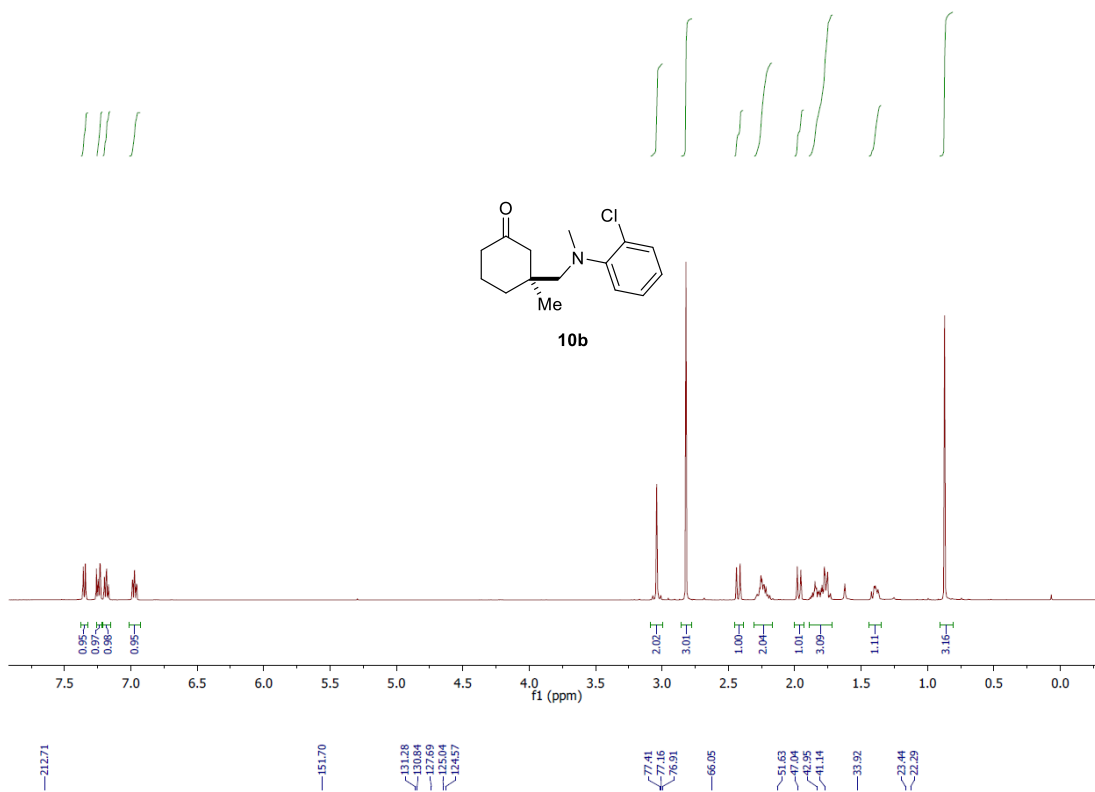

<sup>13</sup>C NMR (126MHz, CDCl<sub>3</sub>)

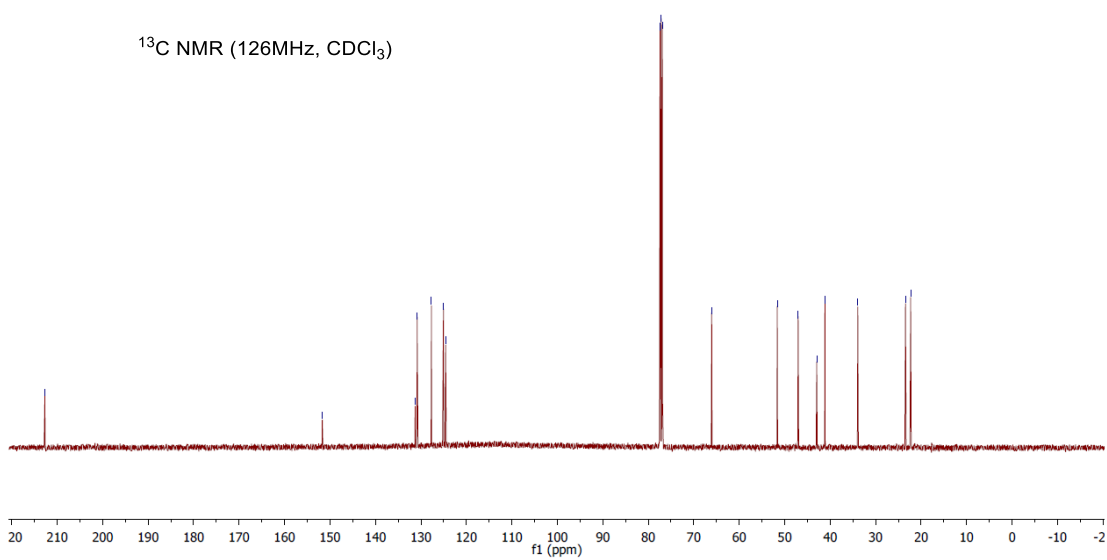

Supplementary Figure 33. <sup>1</sup>H and <sup>13</sup>C NMR spectra for compound **10b**

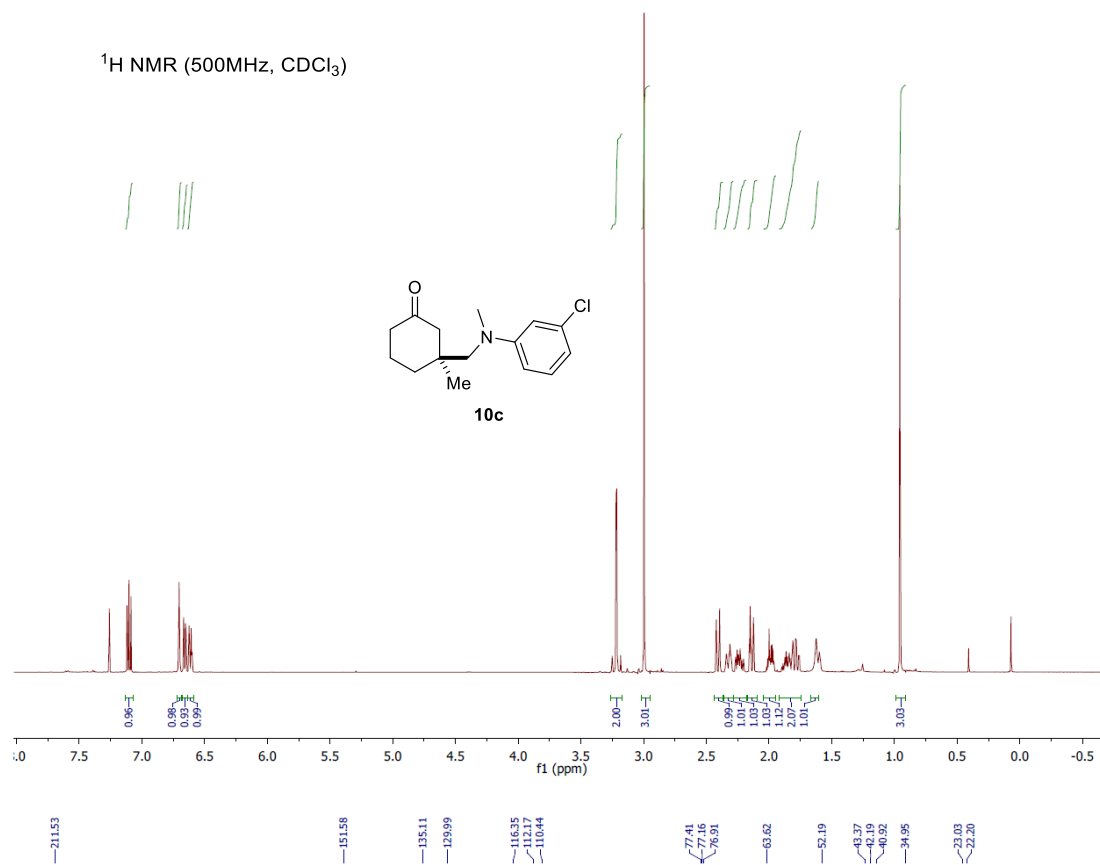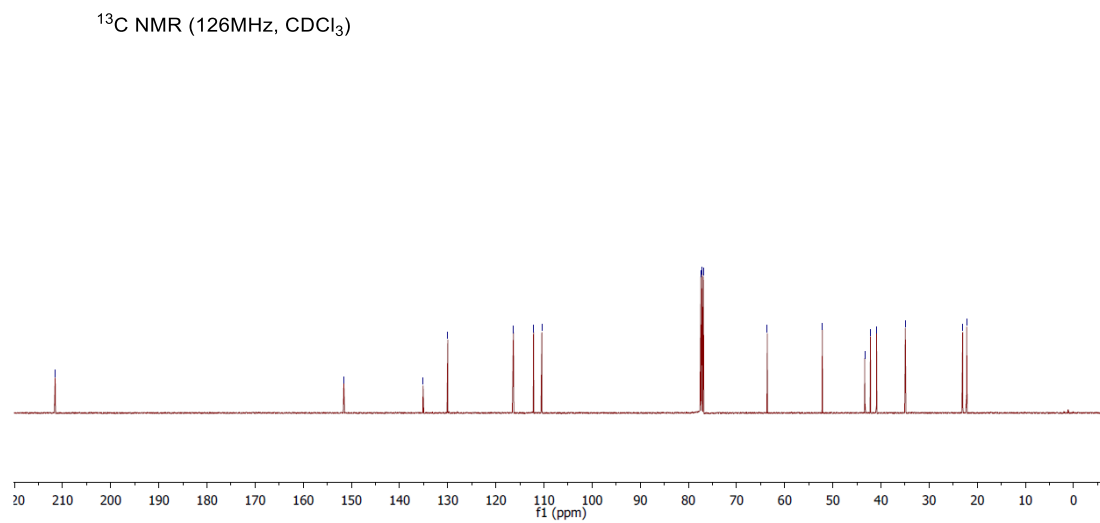

Supplementary Figure 34. <sup>1</sup>H and <sup>13</sup>C NMR spectra for compound **10c**

$^1\text{H}$  NMR (500MHz,  $\text{CDCl}_3$ )

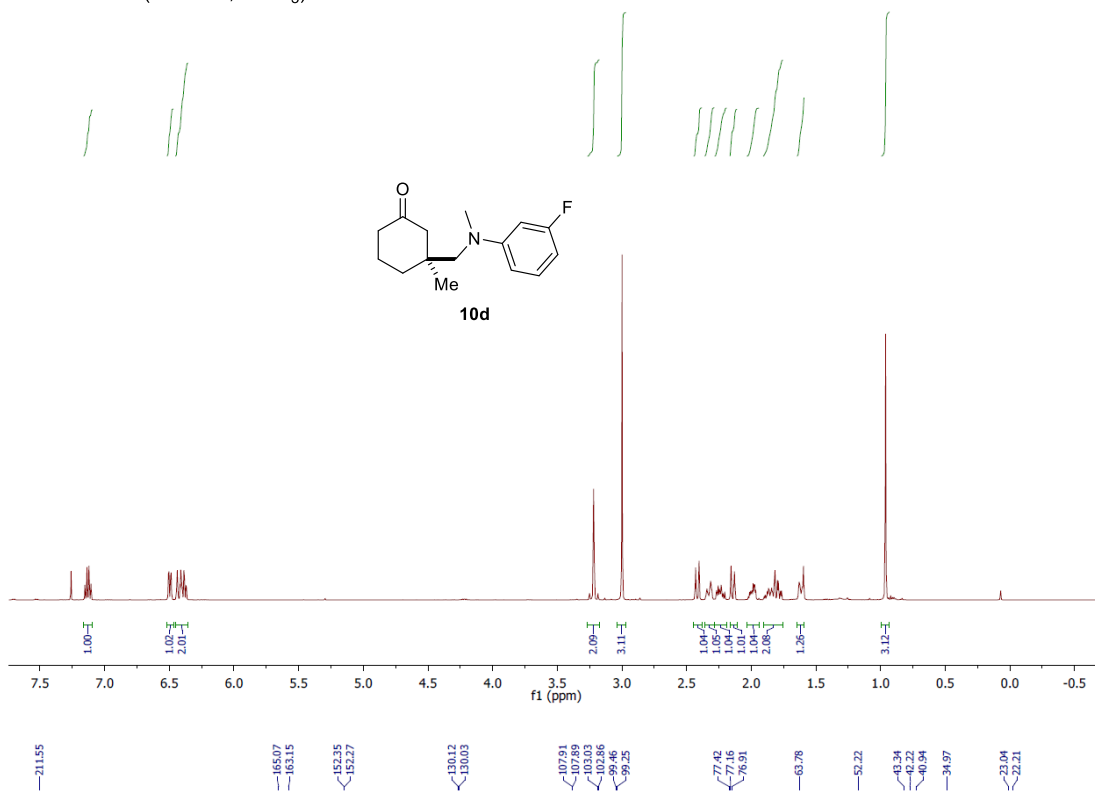

$^{13}\text{C}$  NMR (126MHz,  $\text{CDCl}_3$ )

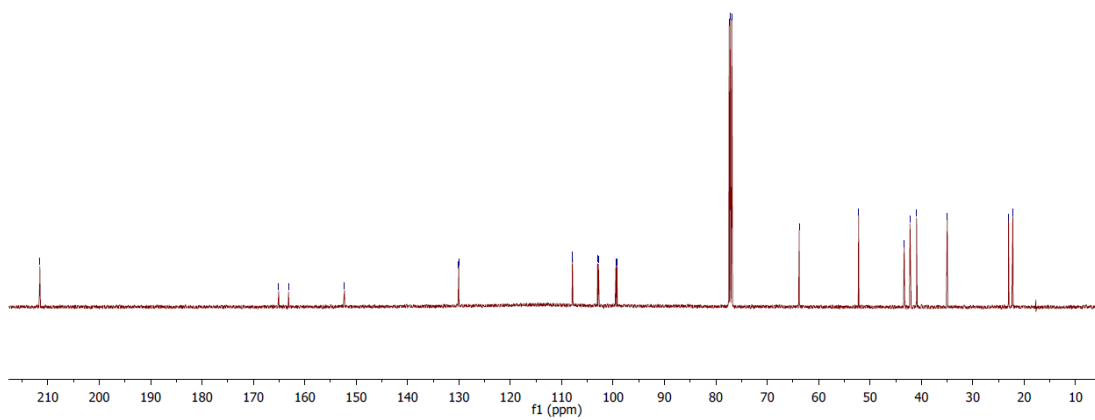

**Supplementary Figure 35.**  $^1\text{H}$  and  $^{13}\text{C}$  NMR spectra for compound **10d**

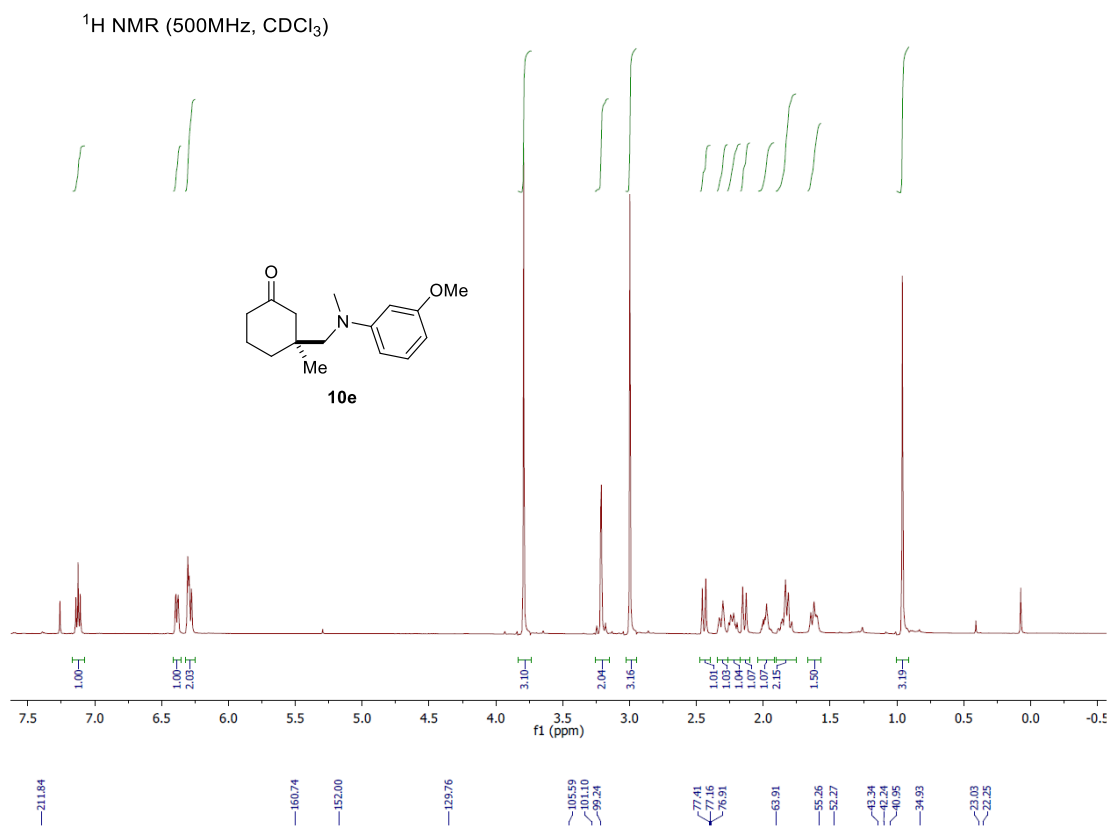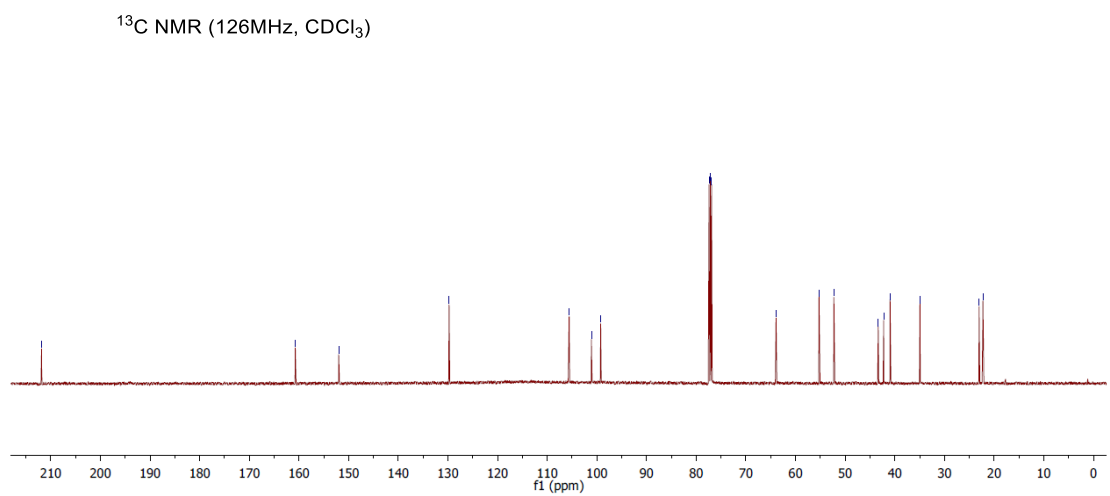

**Supplementary Figure 36.** <sup>1</sup>H and <sup>13</sup>C NMR spectra for compound **10e**

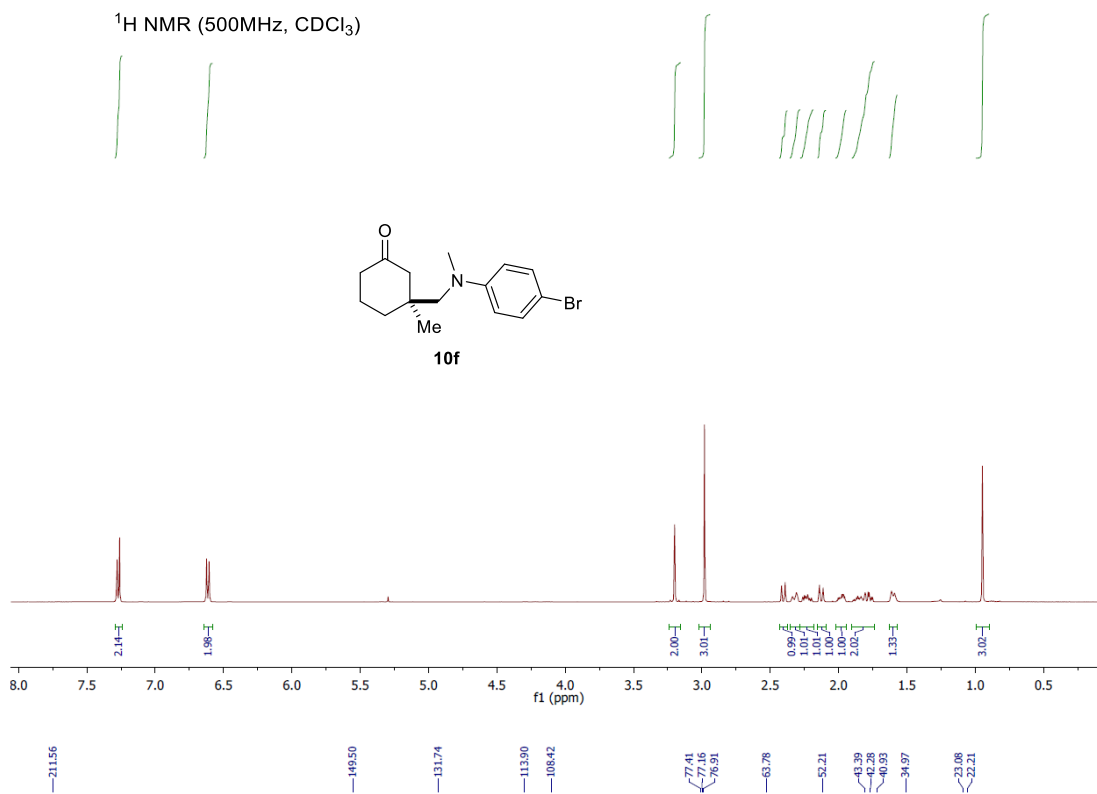

Supplementary Figure 37. <sup>1</sup>H and <sup>13</sup>C NMR spectra for compound **10f**



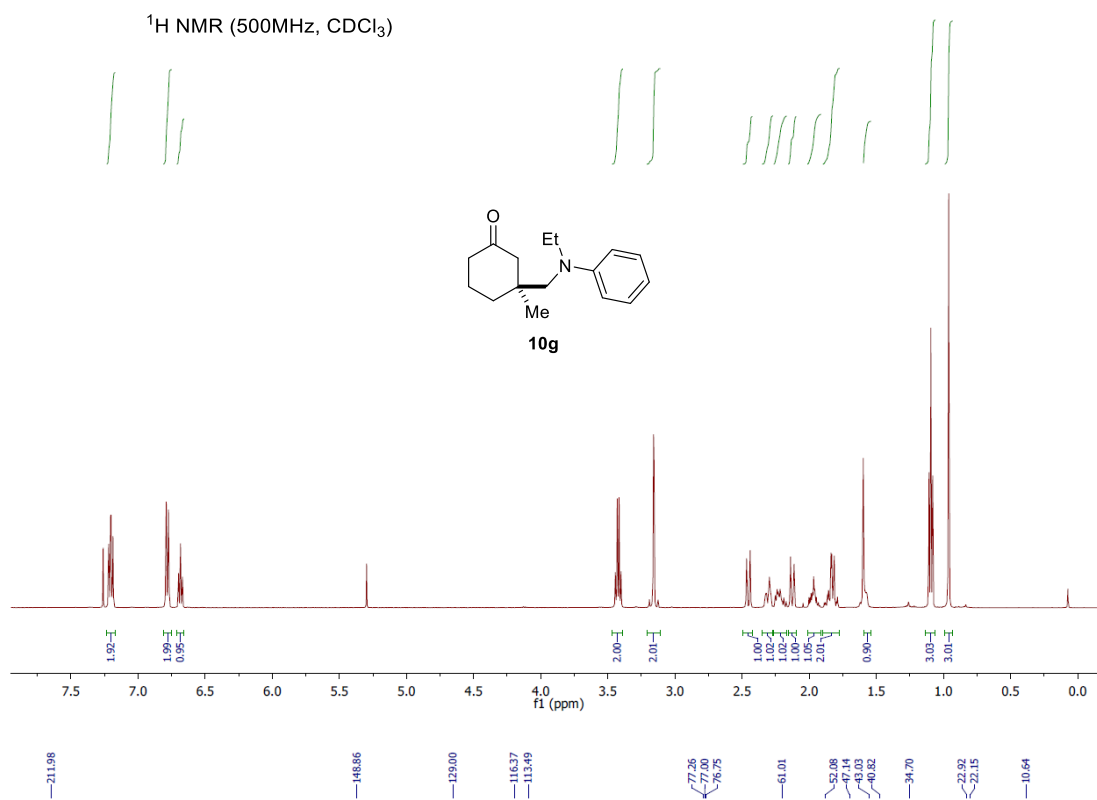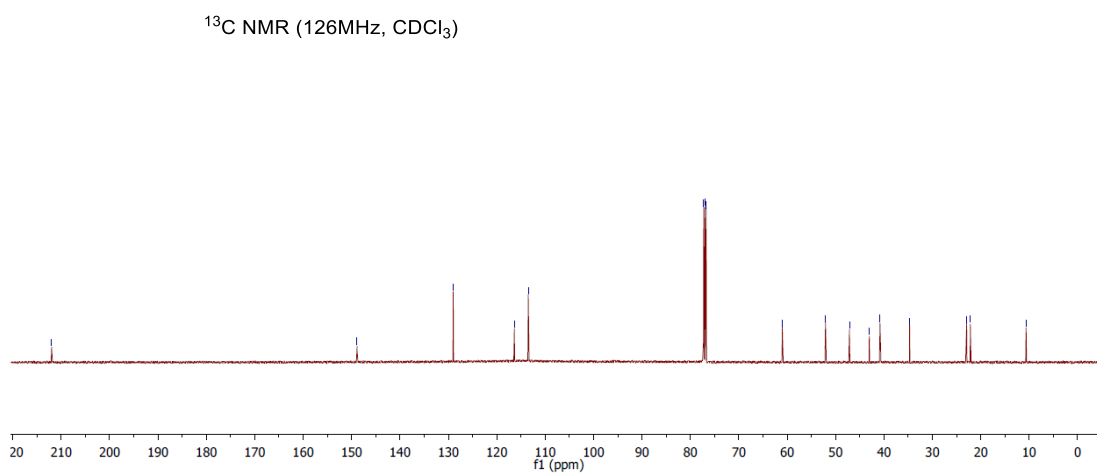

**Supplementary Figure 38.** <sup>1</sup>H and <sup>13</sup>C NMR spectra for compound **10g**

$^1\text{H}$  NMR (500MHz,  $\text{CDCl}_3$ )

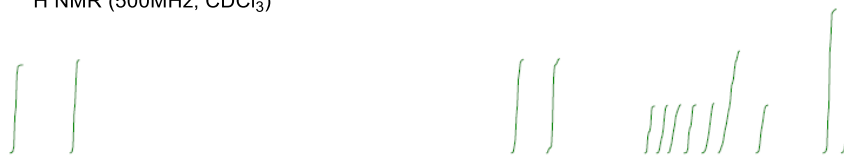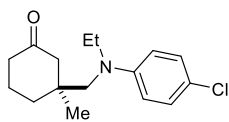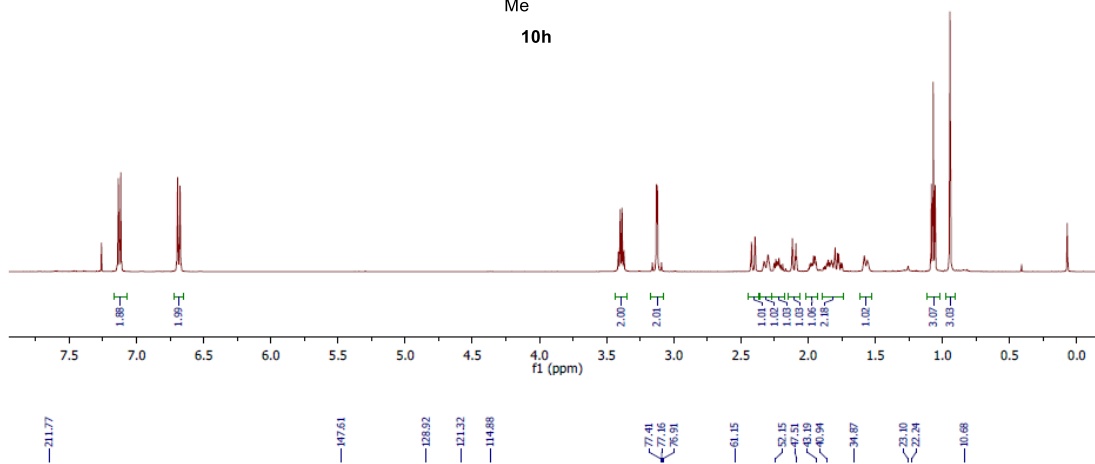

$^{13}\text{C}$  NMR (126MHz,  $\text{CDCl}_3$ )

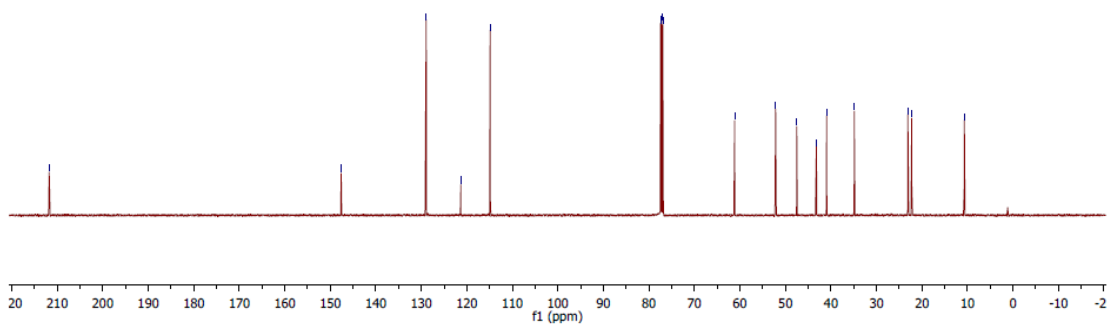

**Supplementary Figure 39.**  $^1\text{H}$  and  $^{13}\text{C}$  NMR spectra for compound **10h**

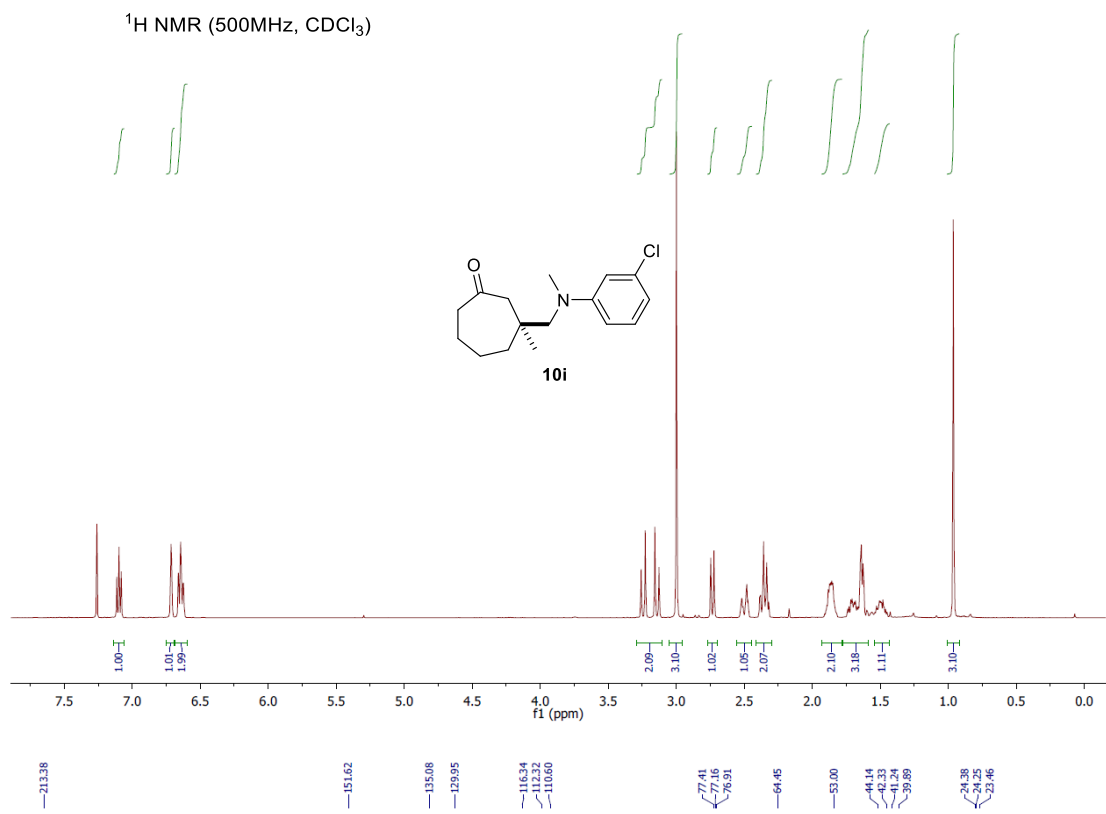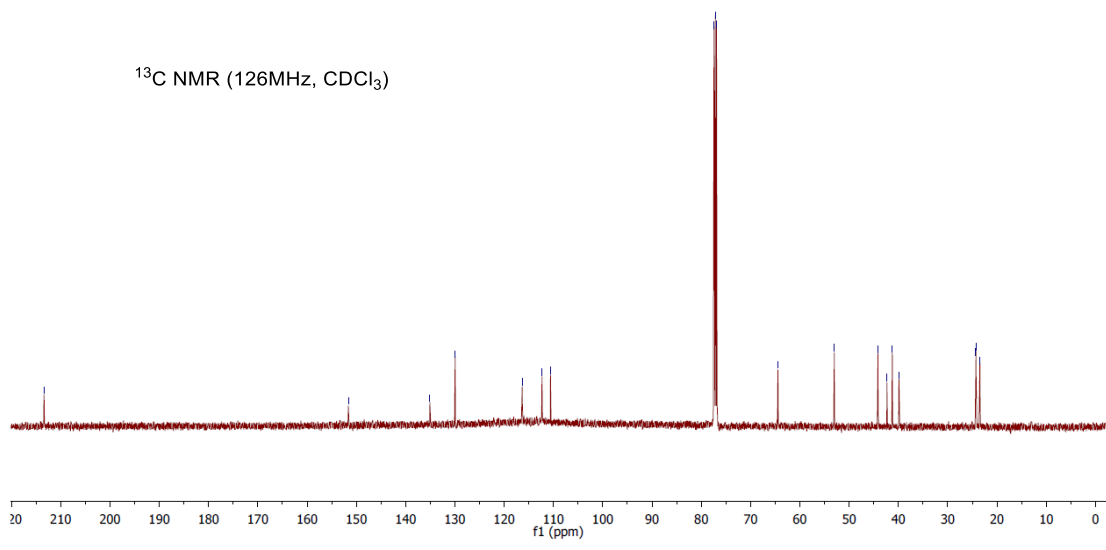

Supplementary Figure 40. <sup>1</sup>H and <sup>13</sup>C NMR spectra for compound **10i**

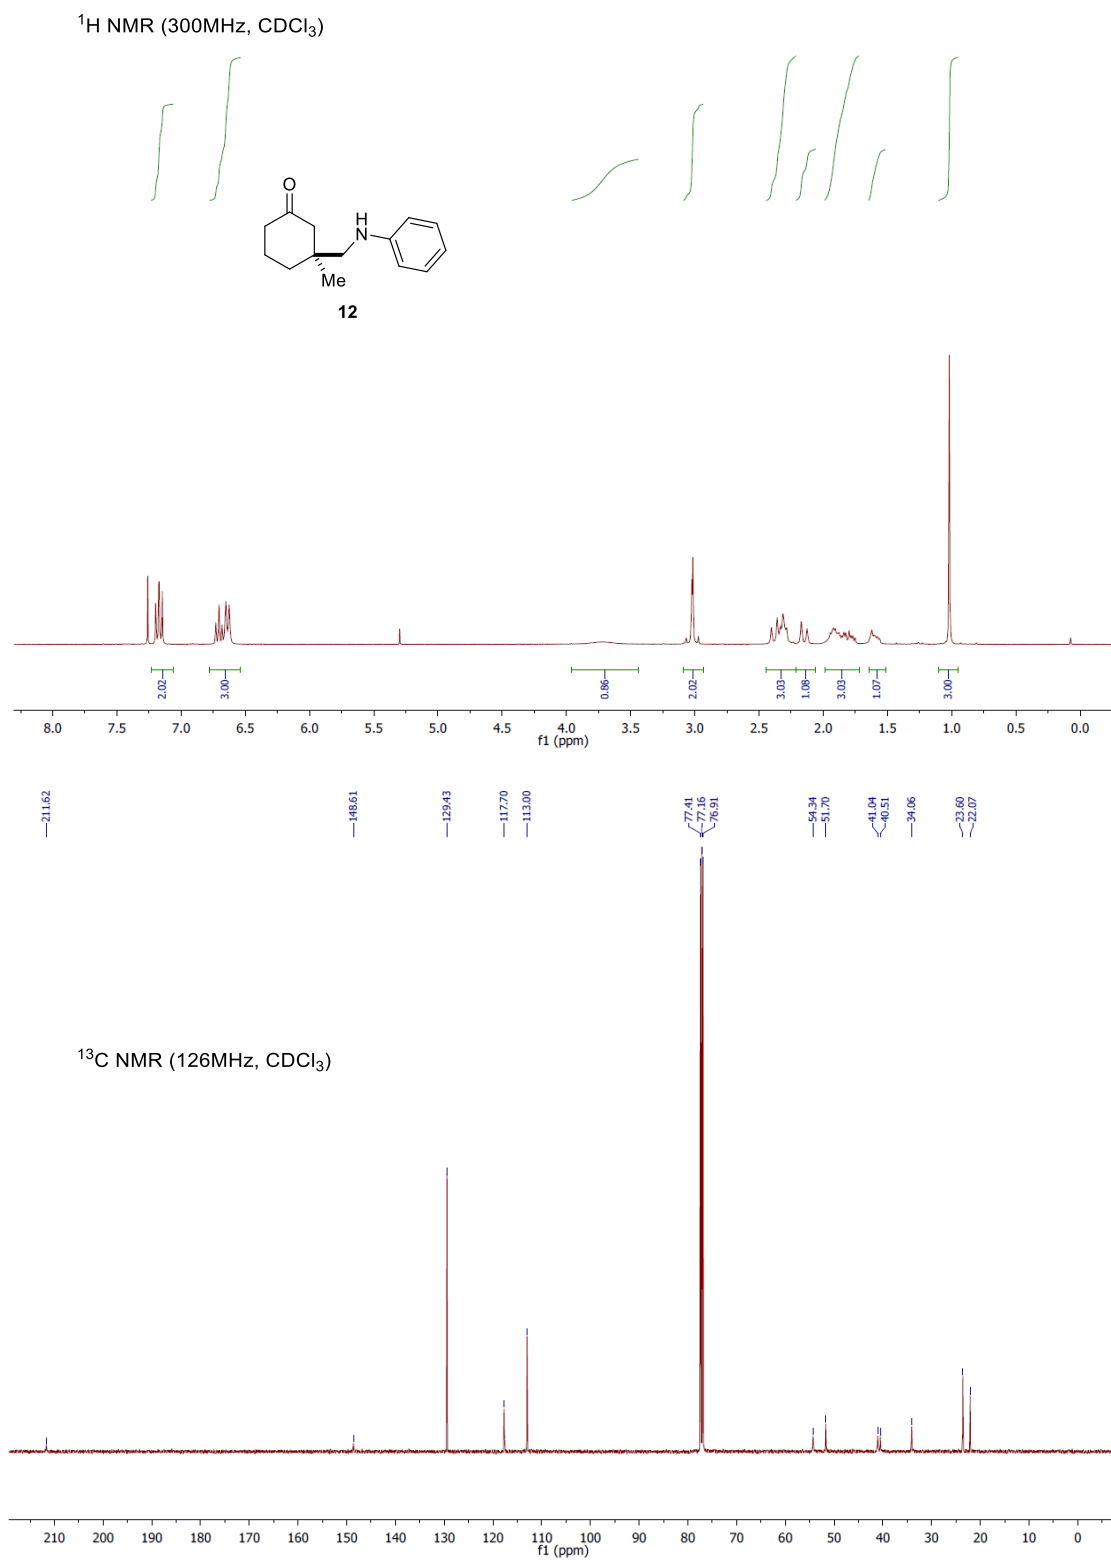

Supplementary Figure 41. <sup>1</sup>H and <sup>13</sup>C NMR spectra for compound **12**

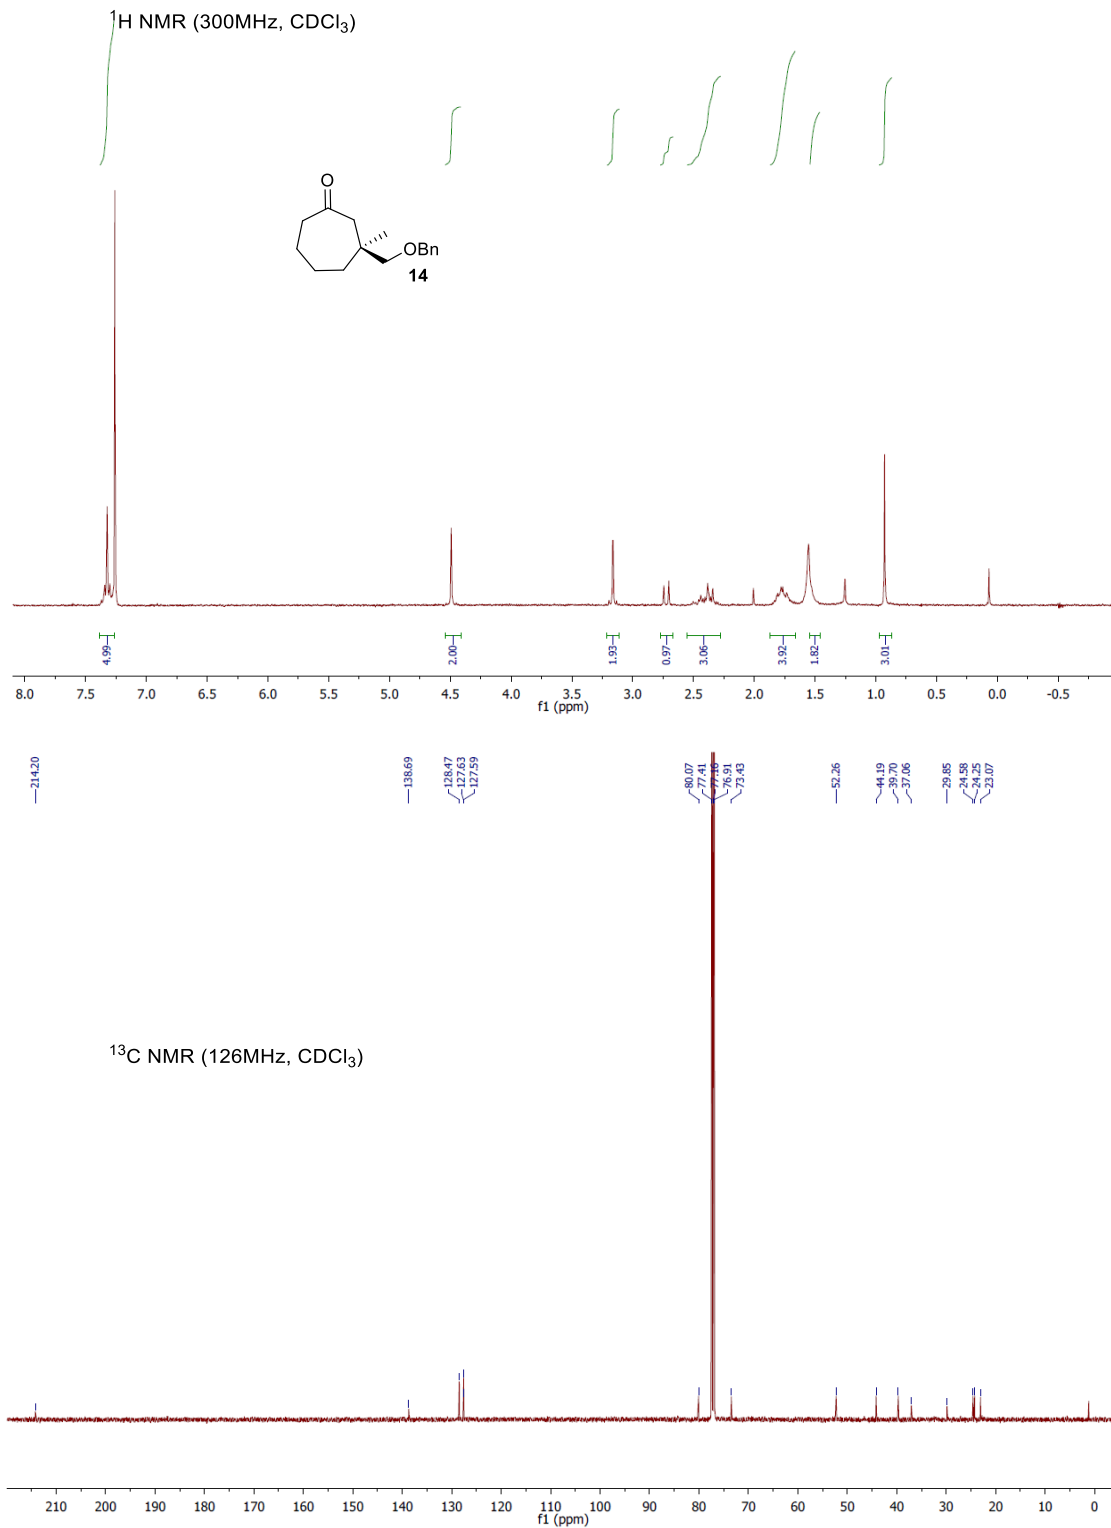

Supplementary Figure 42. <sup>1</sup>H and <sup>13</sup>C NMR spectra for compound **14**

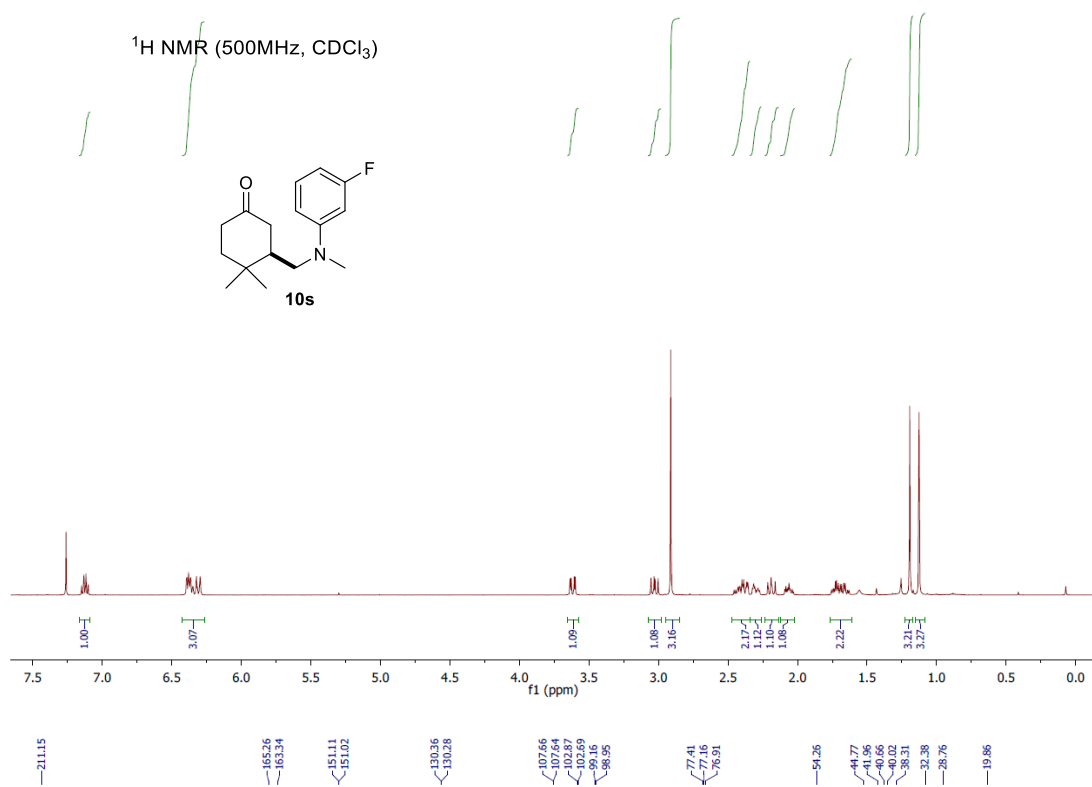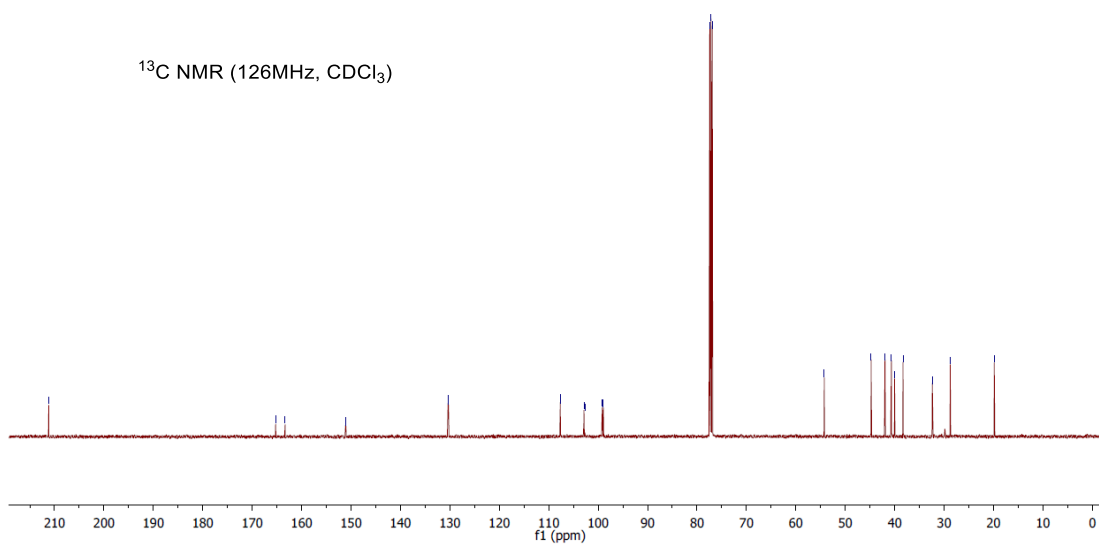

**Supplementary Figure 43.** <sup>1</sup>H and <sup>13</sup>C NMR spectra for compound **10s**

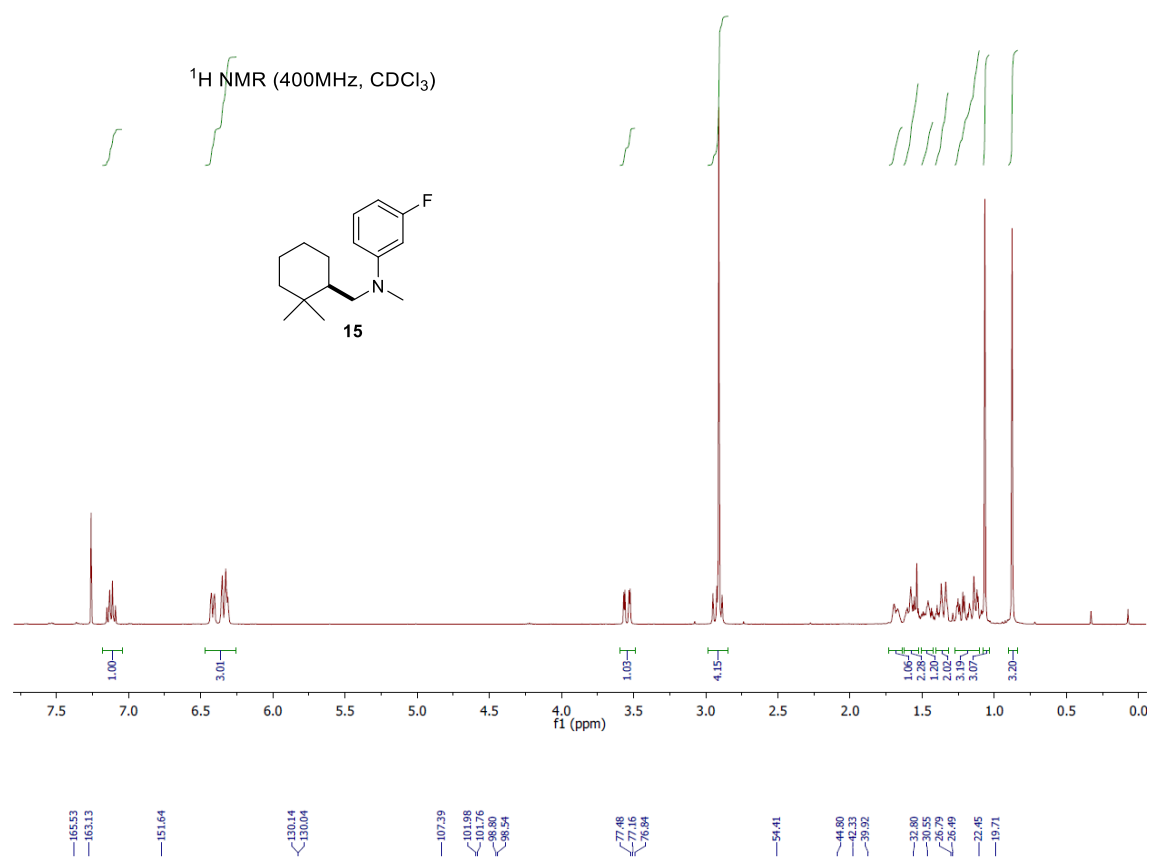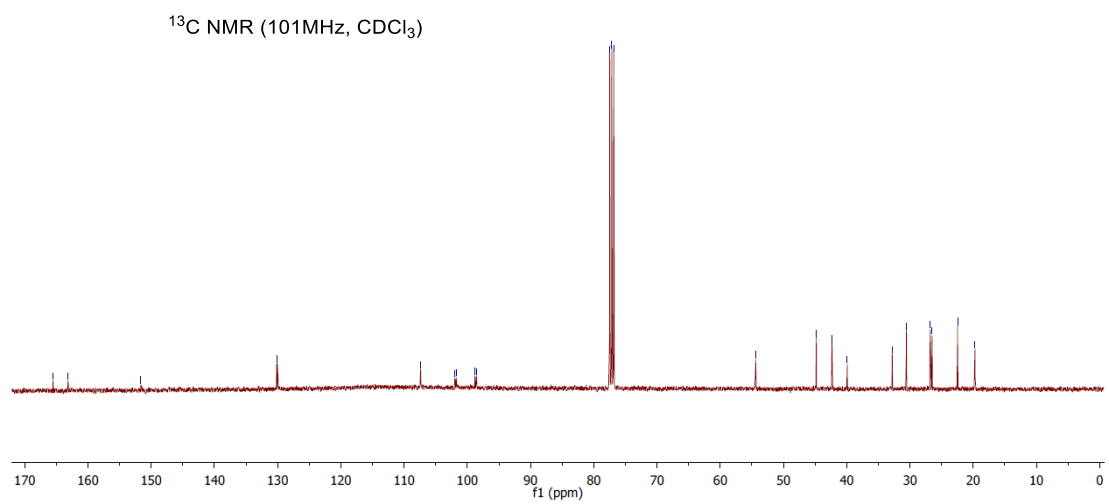

Supplementary Figure 44. <sup>1</sup>H and <sup>13</sup>C NMR spectra for compound **15**

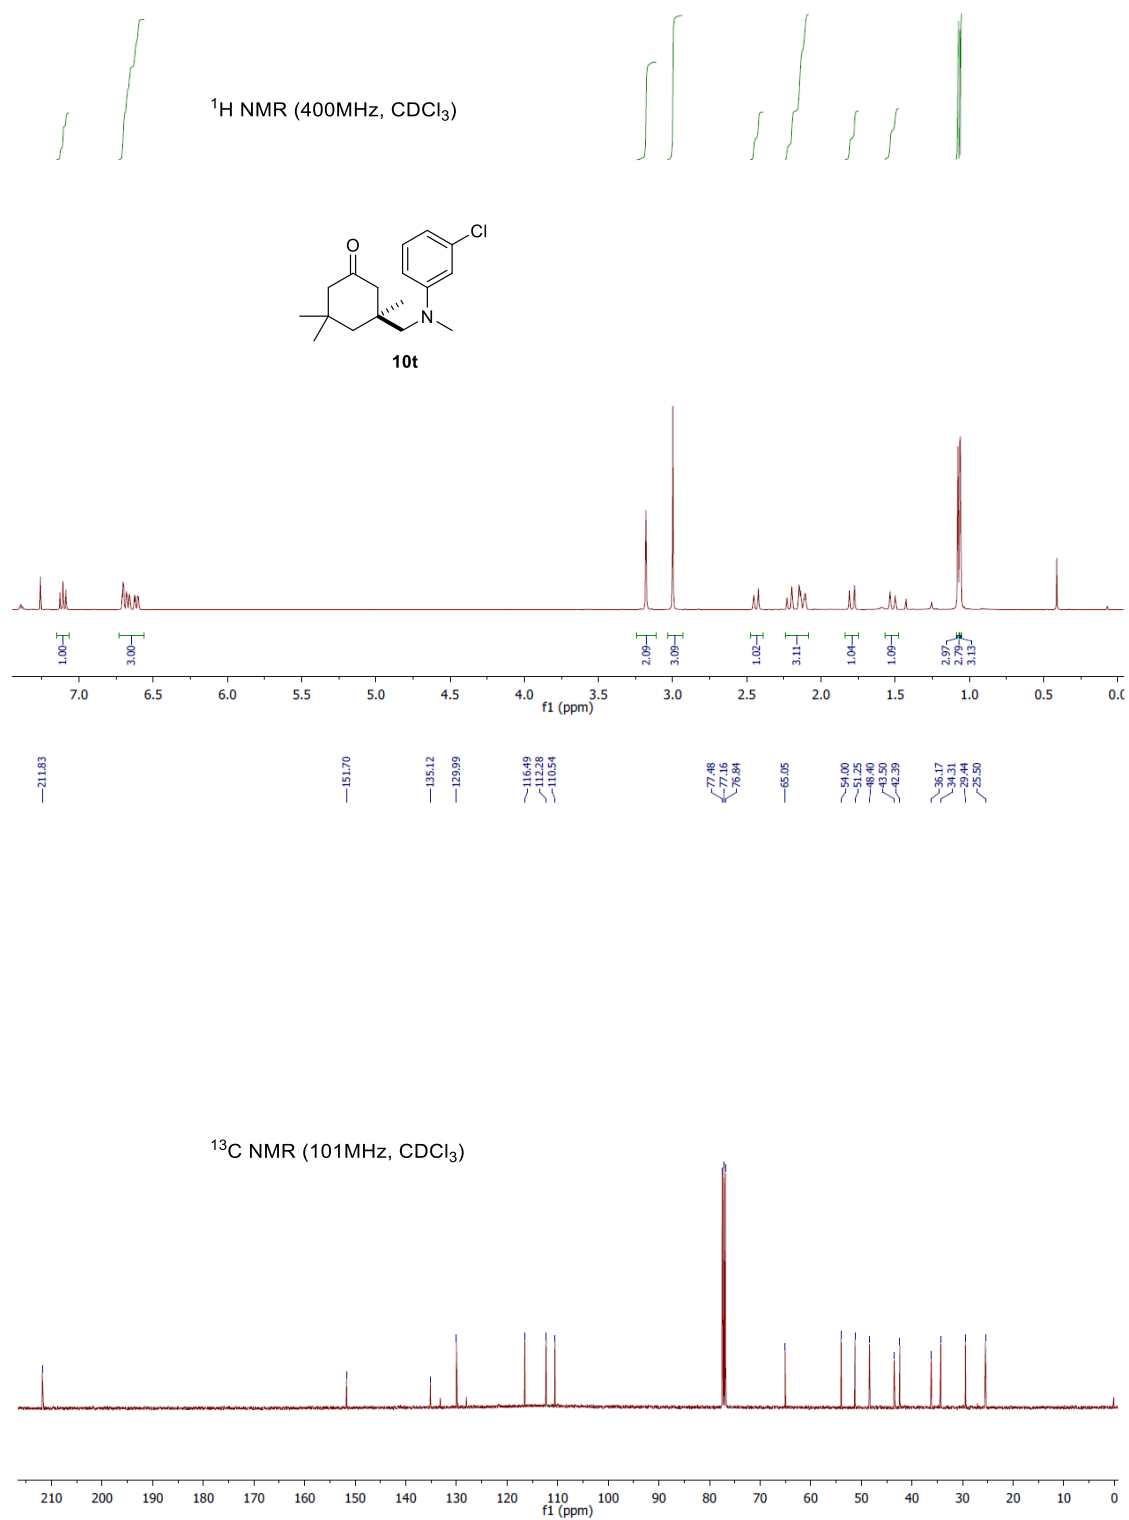

**Supplementary Figure 45.** <sup>1</sup>H and <sup>13</sup>C NMR spectra for compound **10t**



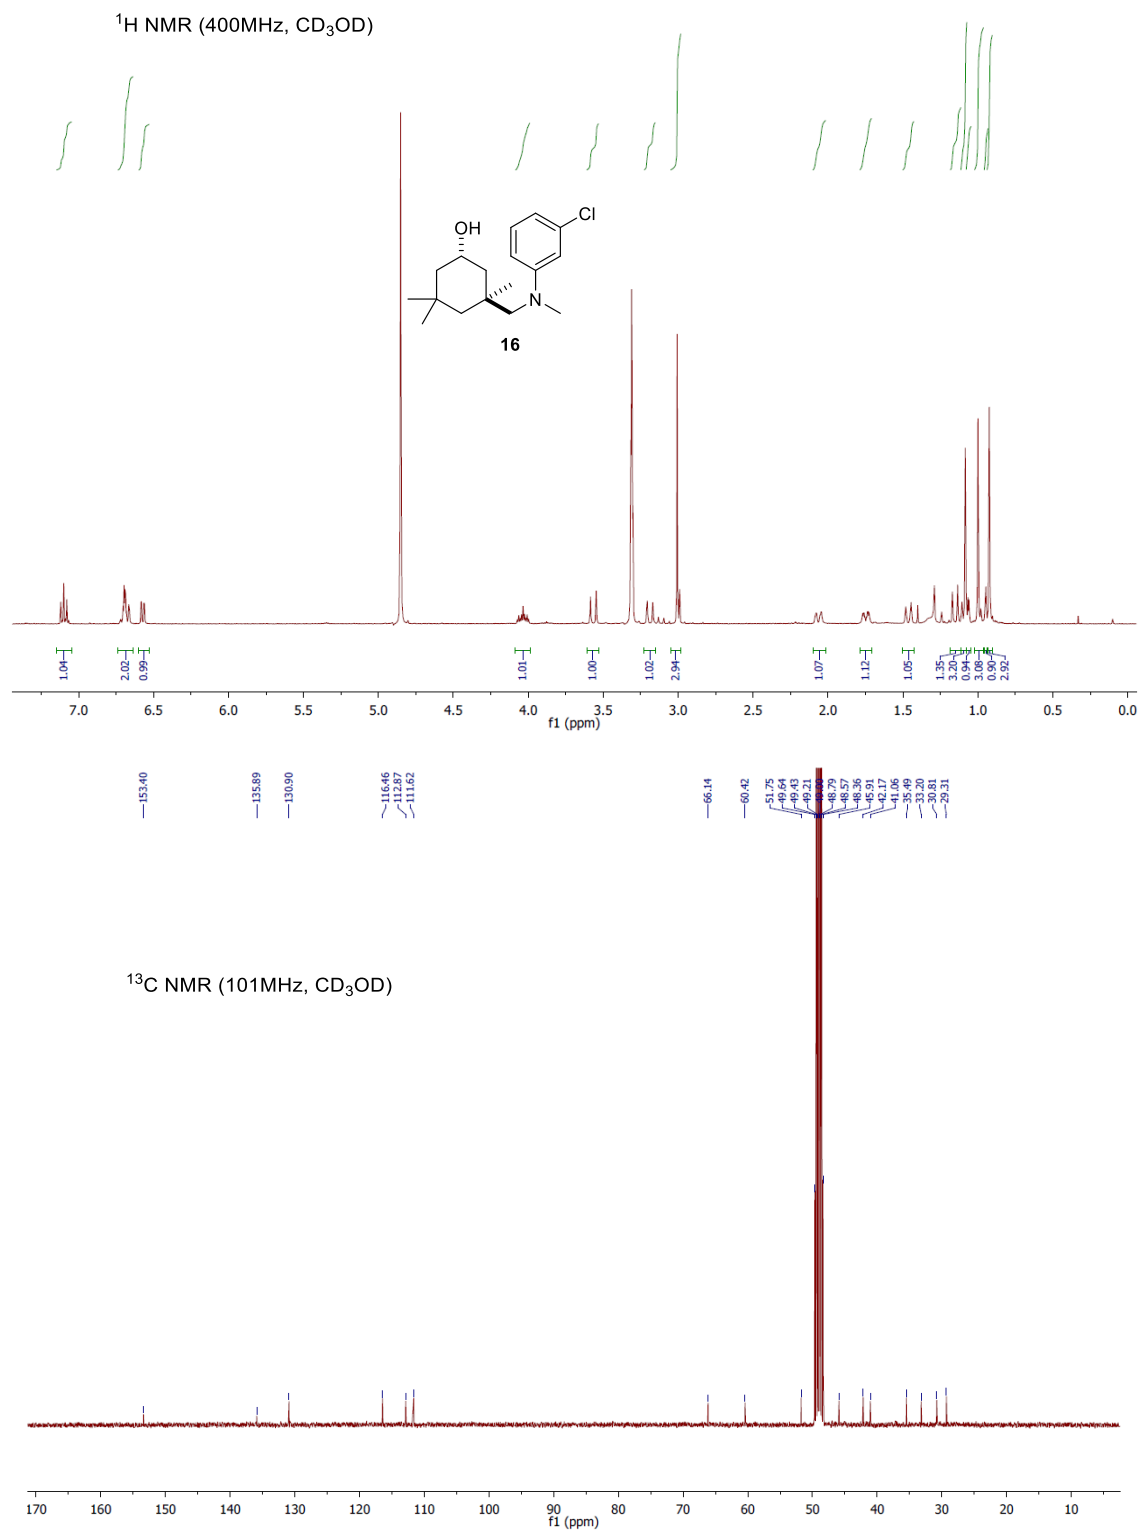

Supplementary Figure 46. <sup>1</sup>H and <sup>13</sup>C NMR spectra for compound 16

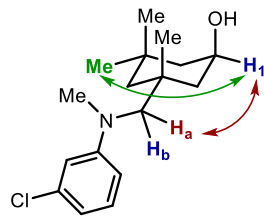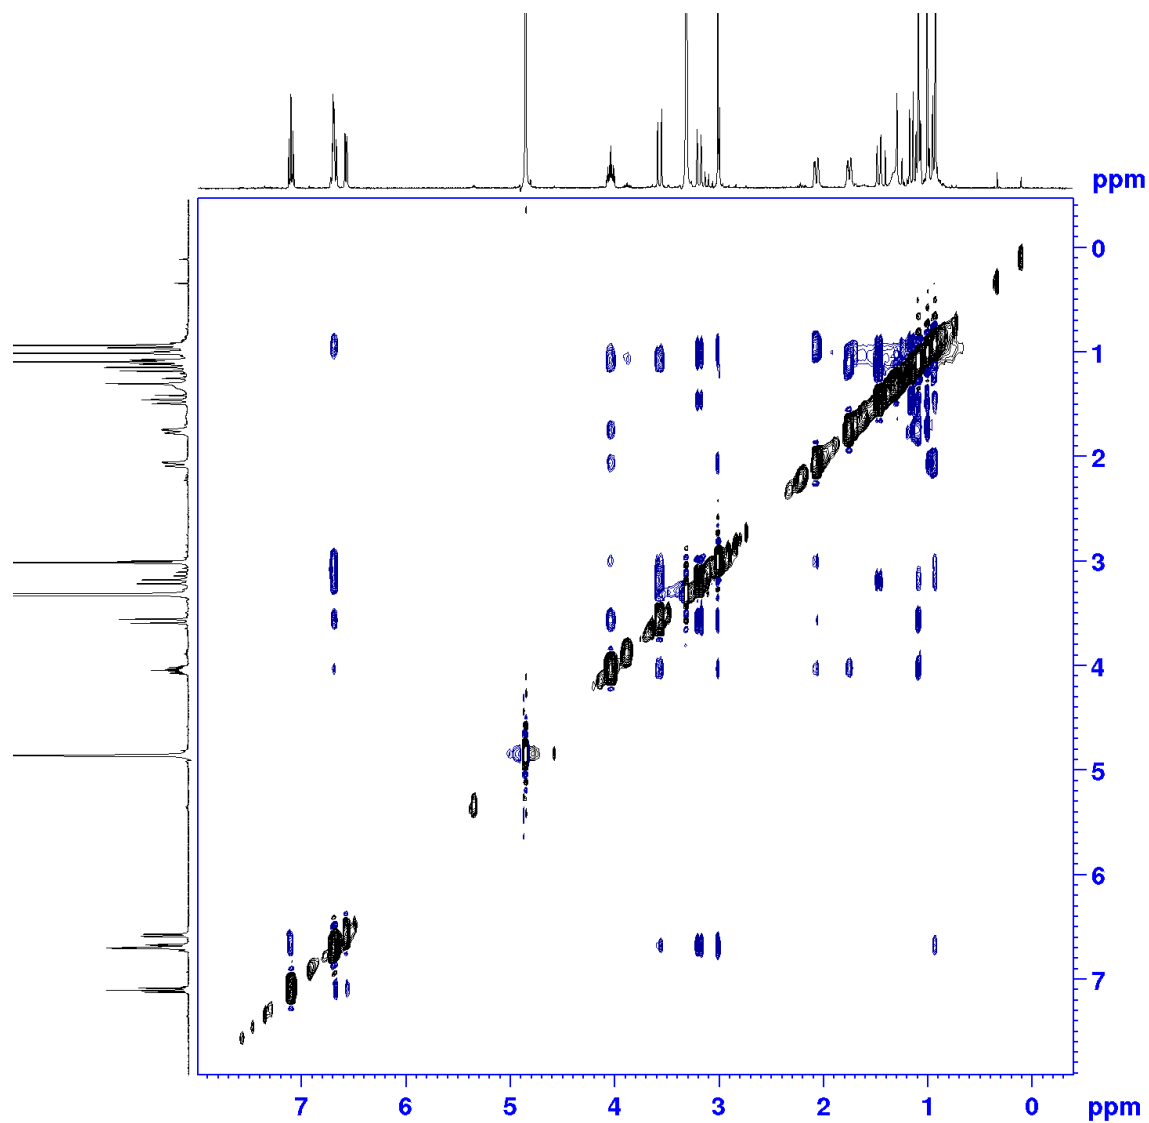

Supplementary Figure 47.  $^1\text{H}$ - $^1\text{H}$  NOESY analysis of product 16 (Diagnostic nOe interactions)

**Condition:** HPLC (Daicel Chiralpak IC-3 column, 95:5 hexane/*i*PrOH, flow rate: 1.00 mL/min,  $\lambda$  = 254 nm)

**Racemic sample 2a:**

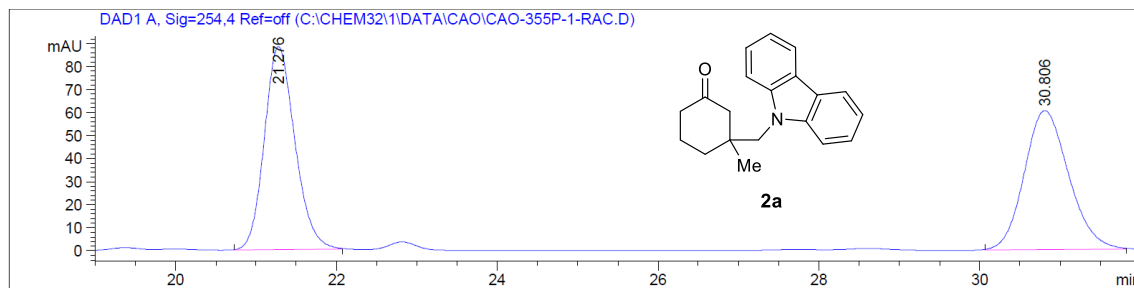

Signal 1: DAD1 A, Sig=254,4 Ref=off

| Peak # | RetTime [min] | Type | Width [min] | Area [mAU*s] | Height [mAU] | Area %  |
|--------|---------------|------|-------------|--------------|--------------|---------|
| 1      | 21.276        | BB   | 0.4072      | 2337.89917   | 88.22630     | 50.2017 |
| 2      | 30.806        | BB   | 0.5918      | 2319.11108   | 60.42317     | 49.7983 |

Totals : 4657.01025 148.64947

**Enantioenriched sample 2a:**

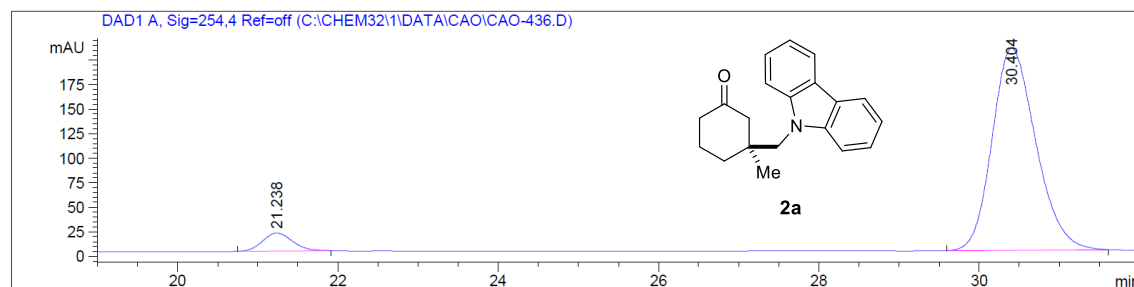

Signal 1: DAD1 A, Sig=254,4 Ref=off

| Peak # | RetTime [min] | Type | Width [min] | Area [mAU*s] | Height [mAU] | Area %  |
|--------|---------------|------|-------------|--------------|--------------|---------|
| 1      | 21.238        | BB   | 0.4063      | 491.93362    | 18.61522     | 5.9025  |
| 2      | 30.404        | BB   | 0.5853      | 7842.43799   | 206.39705    | 94.0975 |

Totals : 8334.37161 225.01227

**Supplementary Figure 48. HPLC spectra for compound 2a**

**Condition:** HPLC (Daicel Chiralpak IC-3 column, 90:10 hexane/*i*PrOH, flow rate: 1.00 mL/min,  $\lambda = 254$  nm)

**Racemic sample 2b:**

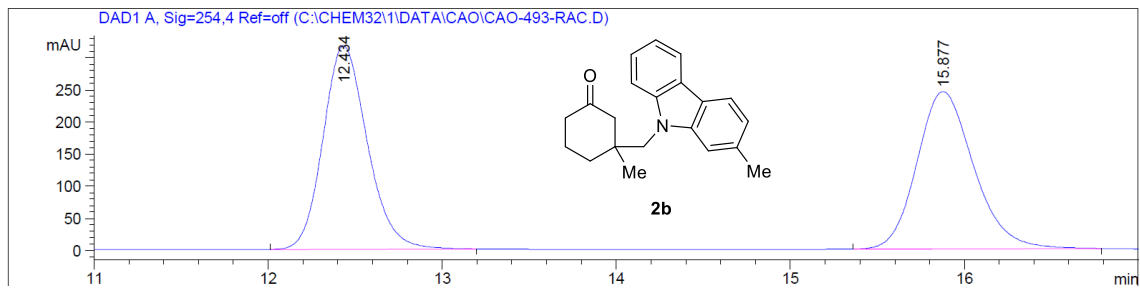

Signal 1: DAD1 A, Sig=254,4 Ref=off

| Peak # | RetTime [min] | Type | Width [min] | Area [mAU*s] | Height [mAU] | Area %  |
|--------|---------------|------|-------------|--------------|--------------|---------|
| 1      | 12.434        | BB   | 0.2724      | 5613.92090   | 317.36285    | 50.0993 |
| 2      | 15.877        | BB   | 0.3499      | 5591.67773   | 245.35324    | 49.9007 |

Totals : 1.12056e4 562.71609

**Enantioenriched sample 2b:**

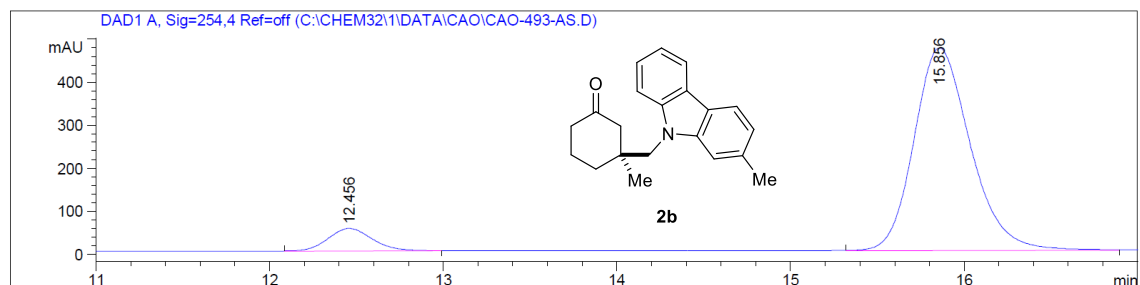

Signal 1: DAD1 A, Sig=254,4 Ref=off

| Peak # | RetTime [min] | Type | Width [min] | Area [mAU*s] | Height [mAU] | Area %  |
|--------|---------------|------|-------------|--------------|--------------|---------|
| 1      | 12.456        | BB   | 0.2765      | 935.13092    | 52.31479     | 8.0980  |
| 2      | 15.856        | BB   | 0.3472      | 1.06125e4    | 470.43481    | 91.9020 |

Totals : 1.15476e4 522.74960

**Supplementary Figure 49. HPLC spectra for compound 2b**

**Condition:** HPLC (Daicel Chiralpak IC-3 column, 90:10 hexane/*i*PrOH, flow rate: 1.00 mL/min,  $\lambda = 254$  nm)

### Racemic sample 2c:

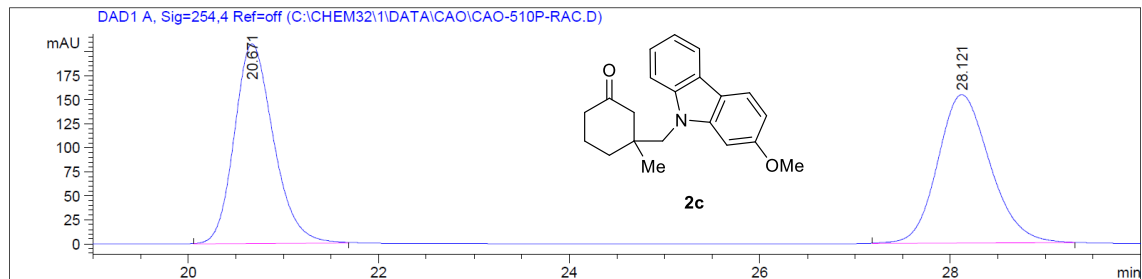

Signal 1: DAD1 A, Sig=254,4 Ref=off

| Peak # | RetTime [min] | Type | Width [min] | Area [mAU*s] | Height [mAU] | Area %  |
|--------|---------------|------|-------------|--------------|--------------|---------|
| 1      | 20.671        | BB   | 0.4383      | 5920.22314   | 207.85457    | 49.9584 |
| 2      | 28.121        | BB   | 0.5913      | 5930.07568   | 154.66113    | 50.0416 |

Totals : 1.18503e4 362.51570

### Enantioenriched sample 2c:

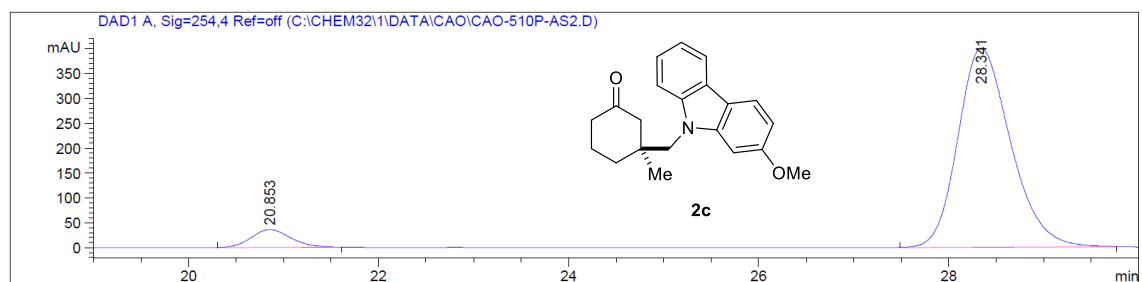

Signal 1: DAD1 A, Sig=254,4 Ref=off

| Peak # | RetTime [min] | Type | Width [min] | Area [mAU*s] | Height [mAU] | Area %  |
|--------|---------------|------|-------------|--------------|--------------|---------|
| 1      | 20.853        | BB   | 0.4430      | 1040.68933   | 36.02860     | 6.3133  |
| 2      | 28.341        | BB   | 0.5917      | 1.54435e4    | 400.67889    | 93.6867 |

Totals : 1.64842e4 436.70750

**Supplementary Figure 50.** HPLC spectra for compound 2c



**Condition:** HPLC (Daicel Chiralpak IC-3 column, 90:10 hexane/*i*PrOH, flow rate: 1.00 mL/min,  $\lambda = 254 \text{ nm}$ )

**Racemic sample 2e:**

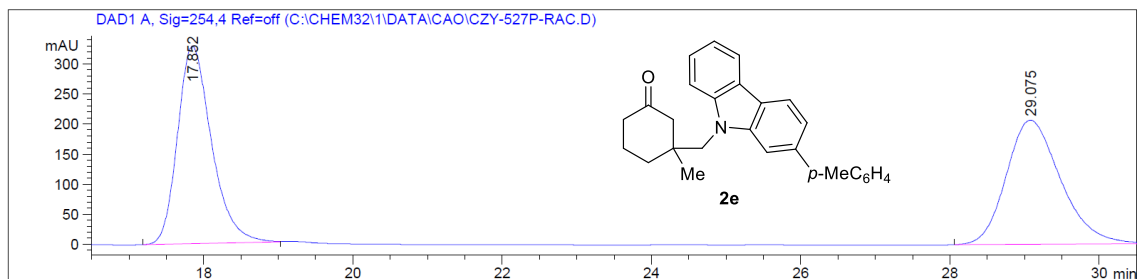

Signal 1: DAD1 A, Sig=254,4 Ref=off

| Peak # | RetTime [min] | Type | Width [min] | Area [mAU*s] | Height [mAU] | Area %  |
|--------|---------------|------|-------------|--------------|--------------|---------|
| 1      | 17.852        | BB   | 0.4826      | 1.03921e4    | 328.94534    | 49.7772 |
| 2      | 29.075        | BB   | 0.7755      | 1.04851e4    | 206.79938    | 50.2228 |

Totals : 2.08772e4 535.74472

**Enantioenriched sample 2e:**

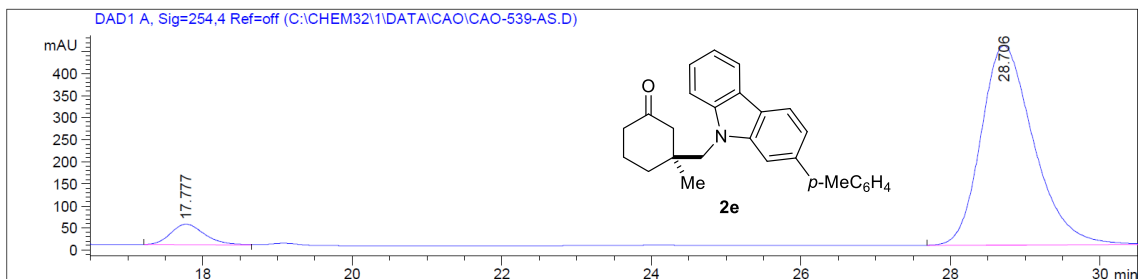

Signal 1: DAD1 A, Sig=254,4 Ref=off

| Peak # | RetTime [min] | Type | Width [min] | Area [mAU*s] | Height [mAU] | Area %  |
|--------|---------------|------|-------------|--------------|--------------|---------|
| 1      | 17.777        | BB   | 0.4843      | 1488.83105   | 46.90257     | 6.3231  |
| 2      | 28.706        | BB   | 0.7471      | 2.20570e4    | 452.17953    | 93.6769 |

Totals : 2.35458e4 499.08210

**Supplementary Figure 52. HPLC spectra for compound 2e**

**Condition:** HPLC (Daicel Chiralpak IC-3 column, 90:10 hexane/*i*PrOH, flow rate: 1.00 mL/min,  $\lambda = 215$  nm)

**Racemic sample 2f:**

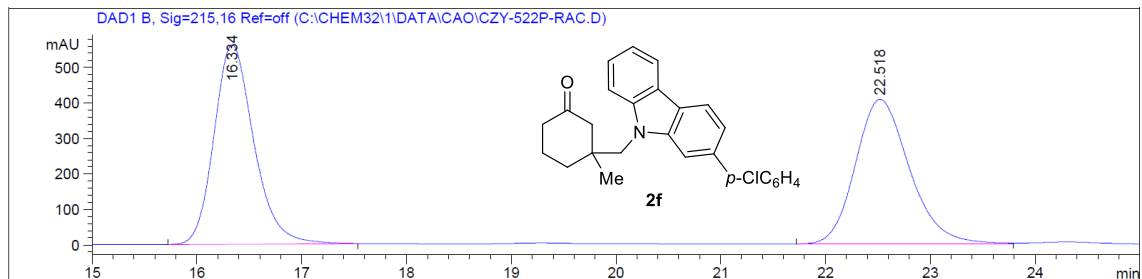

Signal 2: DAD1 B, Sig=215,16 Ref=off

| Peak # | RetTime [min] | Type | Width [min] | Area [mAU*s] | Height [mAU] | Area %  |
|--------|---------------|------|-------------|--------------|--------------|---------|
| 1      | 16.334        | BB   | 0.4062      | 1.48428e4    | 561.82562    | 50.2833 |
| 2      | 22.518        | BB   | 0.5540      | 1.46755e4    | 407.69623    | 49.7167 |

Totals : 2.95183e4 969.52185

**Enantioenriched sample 2f:**

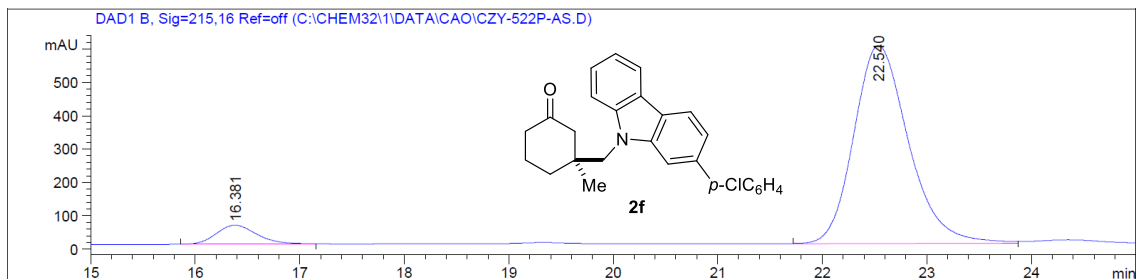

Signal 2: DAD1 B, Sig=215,16 Ref=off

| Peak # | RetTime [min] | Type | Width [min] | Area [mAU*s] | Height [mAU] | Area %  |
|--------|---------------|------|-------------|--------------|--------------|---------|
| 1      | 16.381        | BB   | 0.4149      | 1545.86853   | 57.28119     | 6.6782  |
| 2      | 22.540        | BB   | 0.5560      | 2.16021e4    | 594.36090    | 93.3218 |

Totals : 2.31480e4 651.64209

**Supplementary Figure 53.** HPLC spectra for compound 2f



**Condition:** HPLC (Daicel Chiralpak IC-3 column, 90:10 hexane/*i*PrOH, flow rate: 1.00 mL/min,  $\lambda = 254$  nm)

**Racemic sample 2g:**

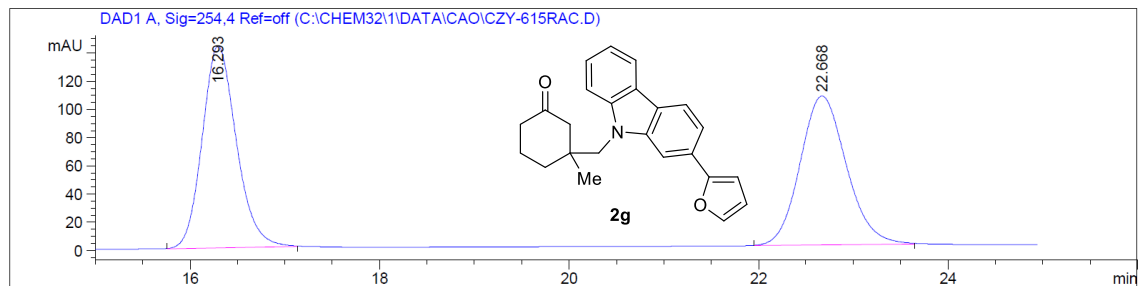

Signal 1: DAD1 A, Sig=254,4 Ref=off

| Peak # | RetTime [min] | Type | Width [min] | Area [mAU*s] | Height [mAU] | Area %  |
|--------|---------------|------|-------------|--------------|--------------|---------|
| 1      | 16.293        | BB   | 0.3869      | 3589.47803   | 142.99339    | 50.1061 |
| 2      | 22.668        | BB   | 0.5233      | 3574.28174   | 105.48942    | 49.8939 |

Totals : 7163.75977 248.48281

**Enantioenriched sample 2g:**

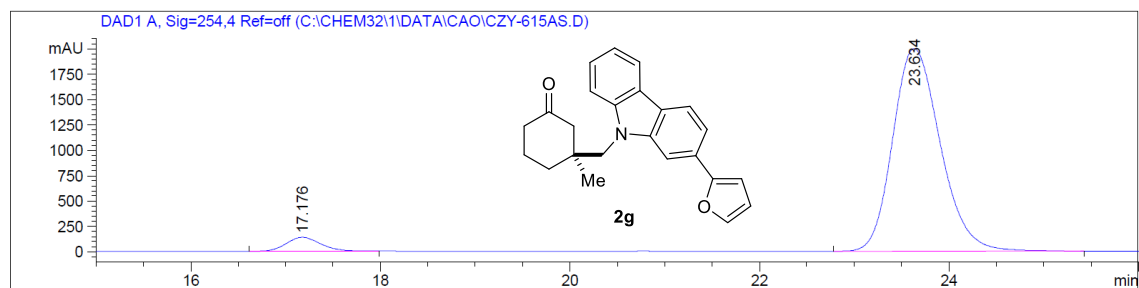

Signal 1: DAD1 A, Sig=254,4 Ref=off

| Peak # | RetTime [min] | Type | Width [min] | Area [mAU*s] | Height [mAU] | Area %  |
|--------|---------------|------|-------------|--------------|--------------|---------|
| 1      | 17.176        | BB   | 0.3909      | 3497.02588   | 137.43231    | 4.7850  |
| 2      | 23.634        | BB   | 0.5425      | 6.95864e4    | 1997.29517   | 95.2150 |

Totals : 7.30834e4 2134.72748

**Supplementary Figure 54. HPLC spectra for compound 2g**

**Condition:** HPLC (Daicel Chiralpak IC-3 column, 90:10 hexane/*i*PrOH, flow rate: 1.00 mL/min,  $\lambda = 254 \text{ nm}$ )

### Racemic sample 2h:

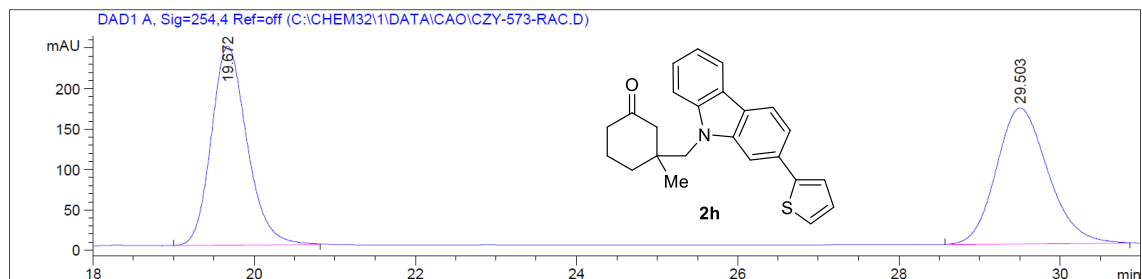

Signal 1: DAD1 A, Sig=254,4 Ref=off

| Peak # | RetTime [min] | Type | Width [min] | Area [mAU*s] | Height [mAU] | Area %  |
|--------|---------------|------|-------------|--------------|--------------|---------|
| 1      | 19.672        | BB   | 0.4722      | 7555.68164   | 246.11217    | 50.1735 |
| 2      | 29.503        | BB   | 0.6888      | 7503.42480   | 168.09425    | 49.8265 |

Totals : 1.50591e4 414.20642

### Enantioenriched sample 2h:

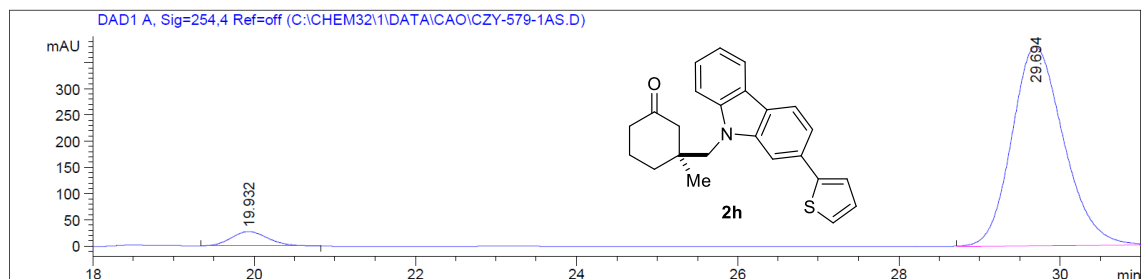

Signal 1: DAD1 A, Sig=254,4 Ref=off

| Peak # | RetTime [min] | Type | Width [min] | Area [mAU*s] | Height [mAU] | Area %  |
|--------|---------------|------|-------------|--------------|--------------|---------|
| 1      | 19.932        | BB   | 0.4930      | 877.72461    | 27.45457     | 4.9261  |
| 2      | 29.694        | BB   | 0.6865      | 1.69402e4    | 379.67194    | 95.0739 |

Totals : 1.78179e4 407.12651

**Supplementary Figure 55. HPLC spectra for compound 2h**

**Condition:** HPLC (Daicel Chiralpak IC-3 column, 90:10 hexane/*i*PrOH, flow rate: 1.00 mL/min,  $\lambda = 254 \text{ nm}$ )

**Racemic sample 2i:**

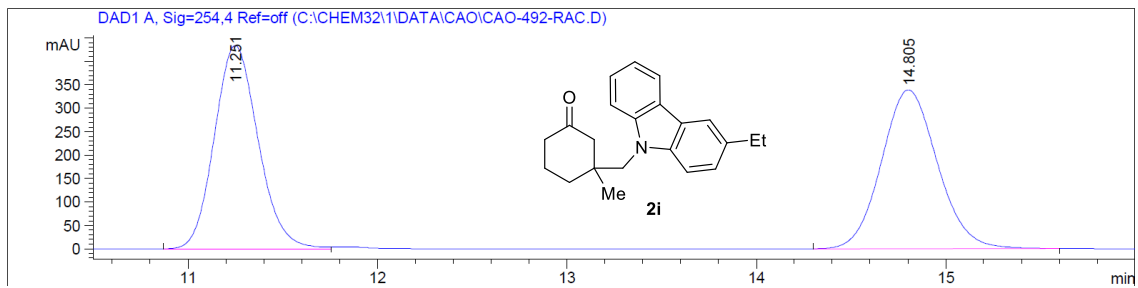

Signal 1: DAD1 A, Sig=254,4 Ref=off

| Peak # | RetTime [min] | Type | Width [min] | Area [mAU*s] | Height [mAU] | Area %  |
|--------|---------------|------|-------------|--------------|--------------|---------|
| 1      | 11.251        | BV   | 0.2495      | 6972.34033   | 433.91388    | 49.9675 |
| 2      | 14.805        | BB   | 0.3182      | 6981.41211   | 339.12308    | 50.0325 |

Totals : 1.39538e4 773.03696

**Enantioenriched sample 2i:**

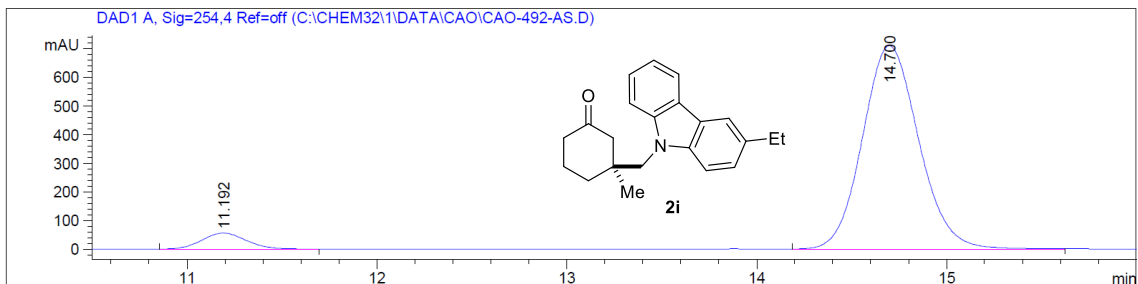

Signal 1: DAD1 A, Sig=254,4 Ref=off

| Peak # | RetTime [min] | Type | Width [min] | Area [mAU*s] | Height [mAU] | Area %  |
|--------|---------------|------|-------------|--------------|--------------|---------|
| 1      | 11.192        | BB   | 0.2548      | 919.95361    | 56.23726     | 5.9348  |
| 2      | 14.700        | BB   | 0.3176      | 1.45811e4    | 709.97058    | 94.0652 |

Totals : 1.55011e4 766.20784

**Supplementary Figure 56.** HPLC spectra for compound **2i**

**Condition:** HPLC (Daicel Chiralpak IC-3 column, 90:10 hexane/*i*PrOH, flow rate: 1.00 mL/min,  $\lambda = 254$  nm)

**Racemic sample 2j:**

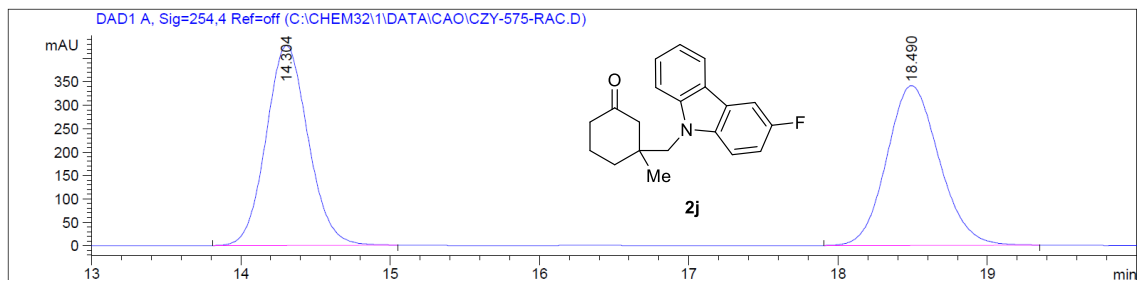

Signal 1: DAD1 A, Sig=254,4 Ref=off

| Peak # | RetTime [min] | Type | Width [min] | Area [mAU*s] | Height [mAU] | Area %  |
|--------|---------------|------|-------------|--------------|--------------|---------|
| 1      | 14.304        | BB   | 0.3021      | 8349.49512   | 427.04382    | 50.0603 |
| 2      | 18.490        | BB   | 0.3786      | 8329.37793   | 341.45773    | 49.9397 |

Totals : 1.66789e4 768.50156

**Enantioenriched sample 2j:**

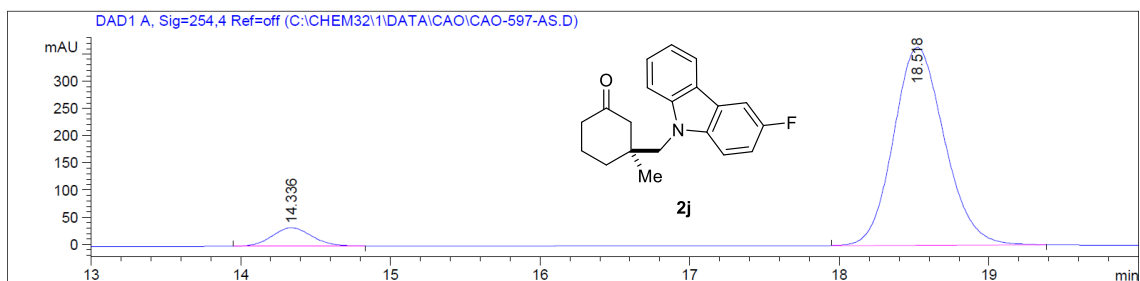

Signal 1: DAD1 A, Sig=254,4 Ref=off

| Peak # | RetTime [min] | Type | Width [min] | Area [mAU*s] | Height [mAU] | Area %  |
|--------|---------------|------|-------------|--------------|--------------|---------|
| 1      | 14.336        | BB   | 0.2872      | 633.24164    | 34.01905     | 6.8495  |
| 2      | 18.518        | BB   | 0.3661      | 8611.88965   | 363.88864    | 93.1505 |

Totals : 9245.13129 397.90769

**Supplementary Figure 57.** HPLC spectra for compound 2j

**Condition:** HPLC (Daicel Chiralpak IC-3 column, 90:10 hexane/*i*PrOH, flow rate: 1.00 mL/min,  $\lambda = 254 \text{ nm}$ )

**Racemic sample 2k:**

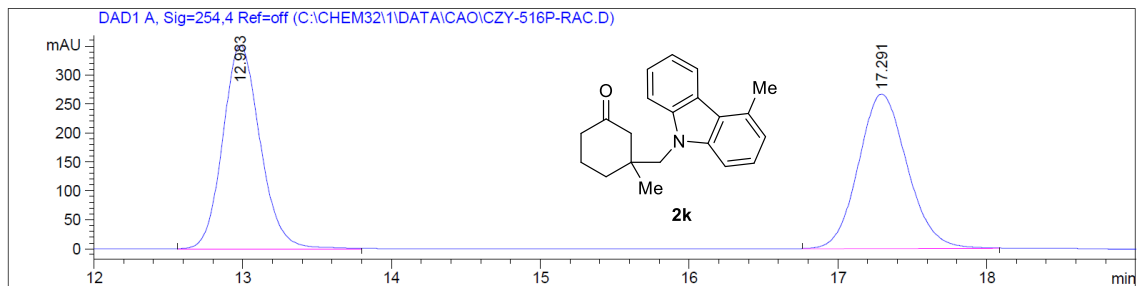

Signal 1: DAD1 A, Sig=254,4 Ref=off

| Peak # | RetTime [min] | Type | Width [min] | Area [mAU*s] | Height [mAU] | Area %  |
|--------|---------------|------|-------------|--------------|--------------|---------|
| 1      | 12.983        | BB   | 0.2666      | 6103.65234   | 351.56015    | 50.1745 |
| 2      | 17.291        | BB   | 0.3512      | 6061.20898   | 266.68472    | 49.8255 |

Totals : 1.21649e4 618.24487

**Enantioenriched sample 2k:**

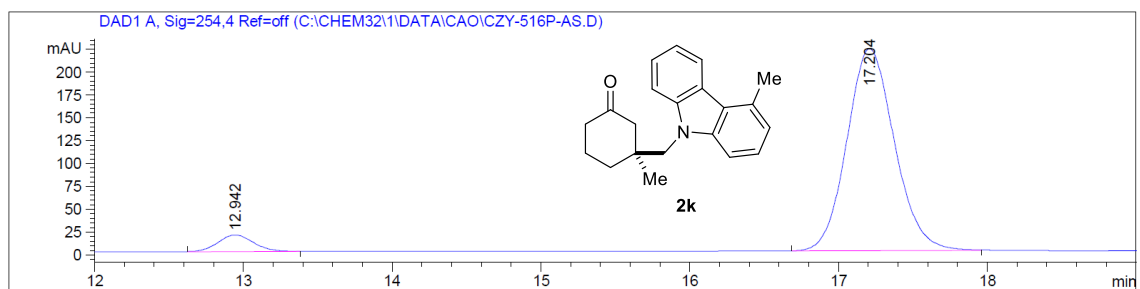

Signal 1: DAD1 A, Sig=254,4 Ref=off

| Peak # | RetTime [min] | Type | Width [min] | Area [mAU*s] | Height [mAU] | Area %  |
|--------|---------------|------|-------------|--------------|--------------|---------|
| 1      | 12.942        | BB   | 0.2586      | 305.01288    | 18.28305     | 5.8567  |
| 2      | 17.204        | BB   | 0.3430      | 4902.91895   | 220.84532    | 94.1433 |

Totals : 5207.93182 239.12837

**Supplementary Figure 58.** HPLC spectra for compound 2k

**Condition:** HPLC (Daicel Chiralpak IC-3 column, 90:10 hexane/*i*PrOH, flow rate: 1.00 mL/min,  $\lambda = 254 \text{ nm}$ )

**Racemic sample 2l:**

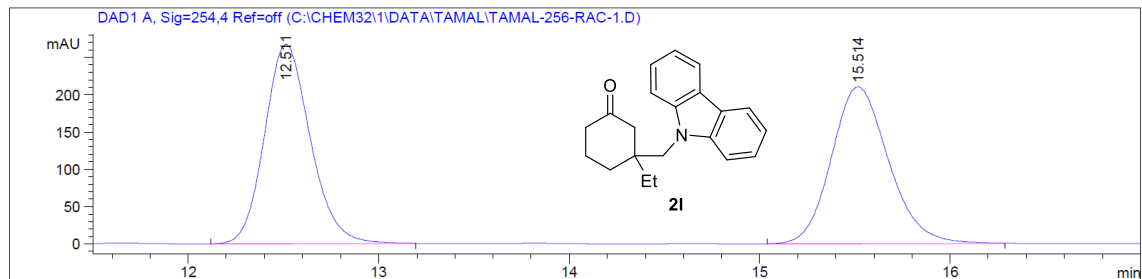

Signal 1: DAD1 A, Sig=254,4 Ref=off

| Peak # | RetTime [min] | Type | Width [min] | Area [mAU*s] | Height [mAU] | Area %  |
|--------|---------------|------|-------------|--------------|--------------|---------|
| 1      | 12.511        | BB   | 0.2569      | 4460.25439   | 267.04309    | 50.4417 |
| 2      | 15.514        | BB   | 0.3215      | 4382.14355   | 209.93507    | 49.5583 |

Totals : 8842.39795 476.97816

**Enantioenriched sample 2l:**

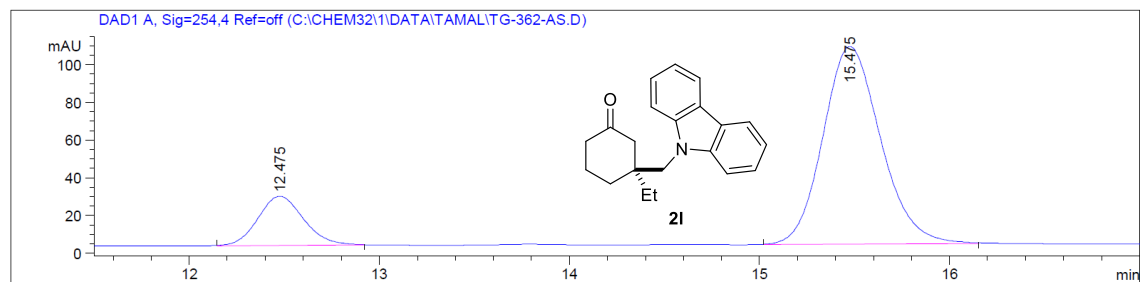

Signal 1: DAD1 A, Sig=254,4 Ref=off

| Peak # | RetTime [min] | Type | Width [min] | Area [mAU*s] | Height [mAU] | Area %  |
|--------|---------------|------|-------------|--------------|--------------|---------|
| 1      | 12.475        | BB   | 0.2571      | 436.55951    | 26.10285     | 16.5171 |
| 2      | 15.475        | BB   | 0.3233      | 2206.52075   | 104.94261    | 83.4829 |

Totals : 2643.08026 131.04546

**Supplementary Figure 59.** HPLC spectra for compound 2l

**Condition:** HPLC (Daicel Chiralpak IC-3 column, 90:10 hexane/*i*PrOH, flow rate: 1.00 mL/min,  $\lambda = 254 \text{ nm}$ )

**Racemic sample 2m:**

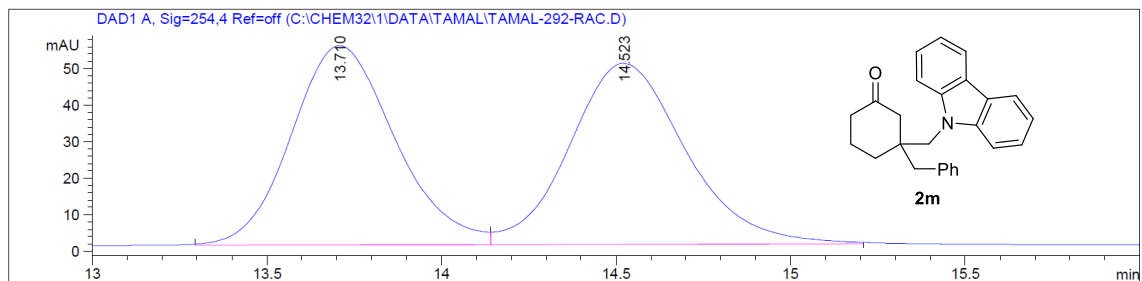

Signal 1: DAD1 A, Sig=254,4 Ref=off

| Peak # | RetTime [min] | Type | Width [min] | Area [mAU*s] | Height [mAU] | Area %  |
|--------|---------------|------|-------------|--------------|--------------|---------|
| 1      | 13.710        | BV   | 0.3192      | 1129.25830   | 54.62945     | 49.5546 |
| 2      | 14.523        | VB   | 0.3544      | 1149.55847   | 49.60733     | 50.4454 |

Totals : 2278.81677 104.23678

**Enantioenriched sample 2m:**

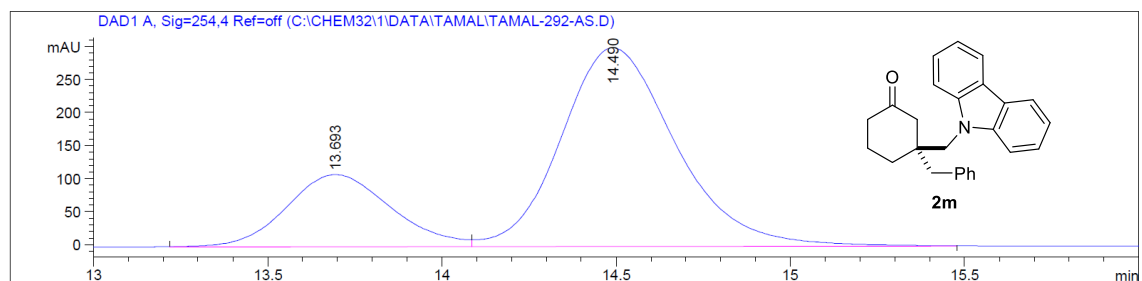

Signal 1: DAD1 A, Sig=254,4 Ref=off

| Peak # | RetTime [min] | Type | Width [min] | Area [mAU*s] | Height [mAU] | Area %  |
|--------|---------------|------|-------------|--------------|--------------|---------|
| 1      | 13.693        | BV   | 0.3223      | 2286.58496   | 109.21271    | 24.8951 |
| 2      | 14.490        | VB   | 0.3517      | 6898.29297   | 300.60345    | 75.1049 |

Totals : 9184.87793 409.81616

**Supplementary Figure 60. HPLC spectra for compound 2m**

**Condition:** HPLC (Daicel Chiralpak IC-3 column, 90:10 hexane/*i*PrOH, flow rate: 1.00 mL/min,  $\lambda = 254$  nm)

**Racemic sample 2n:**

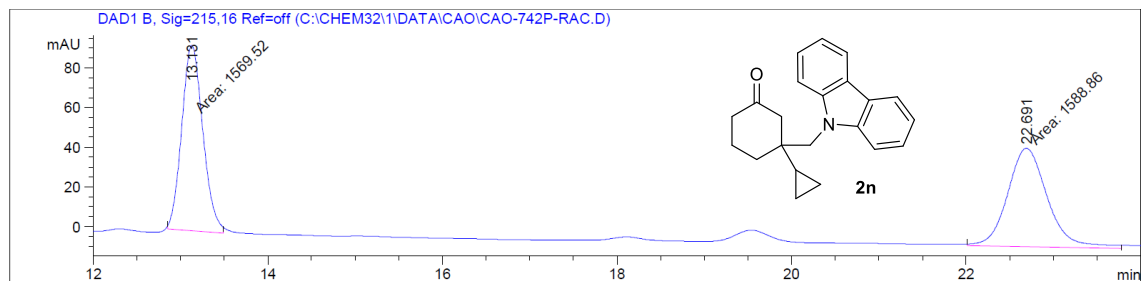

Signal 2: DAD1 B, Sig=215,16 Ref=off

| Peak # | RetTime [min] | Type | Width [min] | Area [mAU*s] | Height [mAU] | Area %  |
|--------|---------------|------|-------------|--------------|--------------|---------|
| 1      | 13.131        | MM   | 0.2797      | 1569.52222   | 93.52643     | 49.6939 |
| 2      | 22.691        | MM   | 0.5323      | 1588.85950   | 49.74448     | 50.3061 |

Totals : 3158.38171 143.27090

**Enantioenriched sample 2n:**

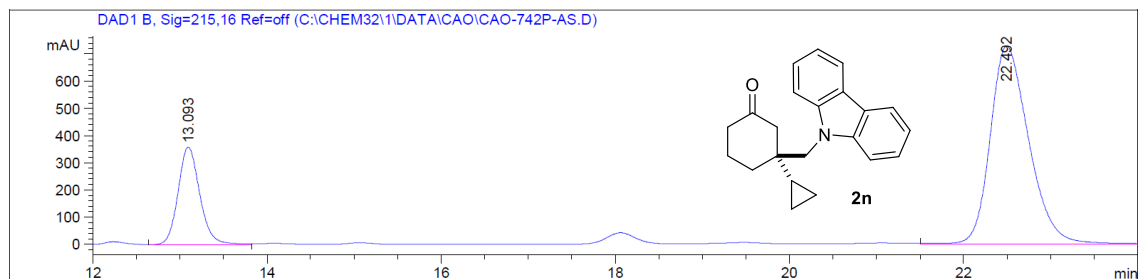

Signal 2: DAD1 B, Sig=215,16 Ref=off

| Peak # | RetTime [min] | Type | Width [min] | Area [mAU*s] | Height [mAU] | Area %  |
|--------|---------------|------|-------------|--------------|--------------|---------|
| 1      | 13.093        | VB   | 0.2657      | 6194.79492   | 358.29019    | 21.8159 |
| 2      | 22.492        | VB   | 0.4725      | 2.22010e4    | 726.51312    | 78.1841 |

Totals : 2.83958e4 1084.80331

**Supplementary Figure 61.** HPLC spectra for compound **2n**



**Condition:** HPLC (Daicel Chiralpak ID-3 column, 90:10 hexane/*i*PrOH, flow rate: 1.00 mL/min,  $\lambda = 254$  nm)

**Racemic sample 2o:**

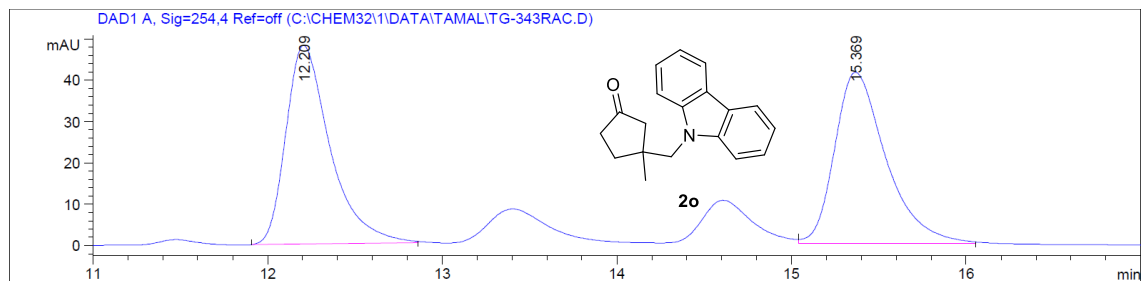

Signal 1: DAD1 A, Sig=254,4 Ref=off

| Peak # | RetTime [min] | Type | Width [min] | Area [mAU*s] | Height [mAU] | Area %  |
|--------|---------------|------|-------------|--------------|--------------|---------|
| 1      | 12.209        | BB   | 0.2655      | 846.99664    | 48.08387     | 50.1375 |
| 2      | 15.369        | VB   | 0.3079      | 842.35028    | 41.30038     | 49.8625 |

Totals : 1689.34692 89.38425

**Enantioenriched sample 2o:**

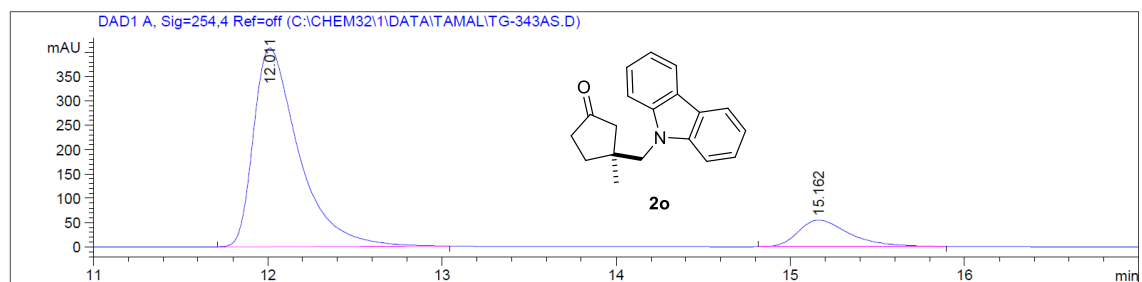

Signal 1: DAD1 A, Sig=254,4 Ref=off

| Peak # | RetTime [min] | Type | Width [min] | Area [mAU*s] | Height [mAU] | Area %  |
|--------|---------------|------|-------------|--------------|--------------|---------|
| 1      | 12.011        | BB   | 0.2698      | 7347.42188   | 408.48520    | 86.8085 |
| 2      | 15.162        | BB   | 0.3079      | 1116.51660   | 54.75738     | 13.1915 |

Totals : 8463.93848 463.24258

**Supplementary Figure 62. HPLC spectra for compound 2o**

**Condition:** HPLC (Daicel Chiralpak IC-3 column, 90:10 hexane/*i*PrOH, flow rate: 1.00 mL/min,  $\lambda = 254 \text{ nm}$ )

**Racemic sample 2p:**

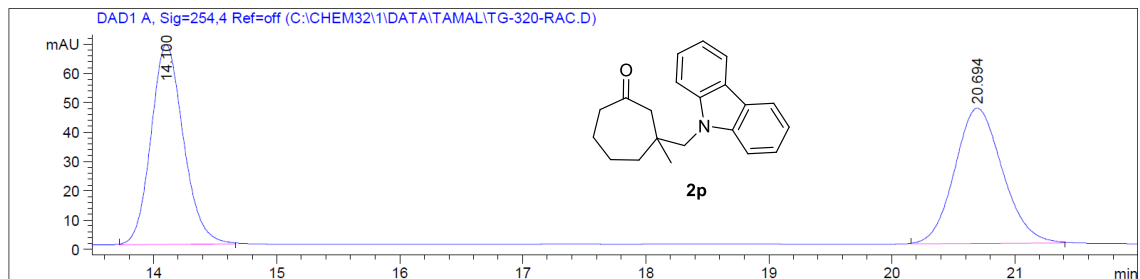

Signal 1: DAD1 A, Sig=254,4 Ref=off

| Peak # | RetTime [min] | Type | Width [min] | Area [mAU*s] | Height [mAU] | Area %  |
|--------|---------------|------|-------------|--------------|--------------|---------|
| 1      | 14.100        | BB   | 0.2815      | 1245.83081   | 68.07520     | 49.9693 |
| 2      | 20.694        | BB   | 0.4172      | 1247.36206   | 46.17547     | 50.0307 |

Totals : 2493.19287 114.25067

**Enantioenriched sample 2p:**

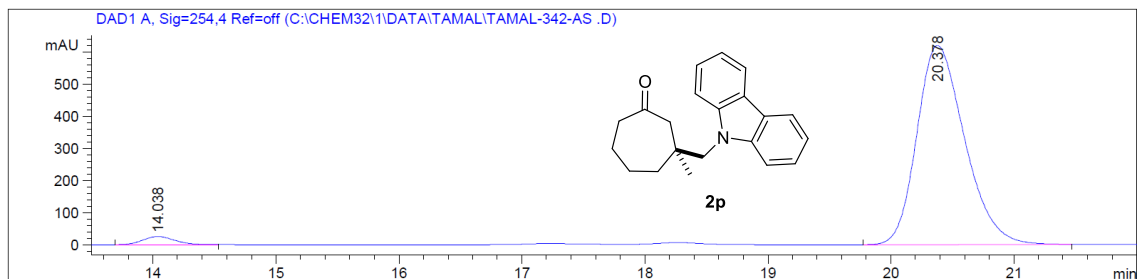

Signal 1: DAD1 A, Sig=254,4 Ref=off

| Peak # | RetTime [min] | Type | Width [min] | Area [mAU*s] | Height [mAU] | Area %  |
|--------|---------------|------|-------------|--------------|--------------|---------|
| 1      | 14.038        | BB   | 0.2800      | 466.03348    | 25.64517     | 2.6992  |
| 2      | 20.378        | BB   | 0.4155      | 1.67993e4    | 621.22626    | 97.3008 |

Totals : 1.72653e4 646.87143

**Supplementary Figure 63. HPLC spectra for compound 2p**

**Condition:** HPLC (Daicel Chiralpak IC-3 column, 90:10 hexane/*i*PrOH, flow rate: 1.00 mL/min,  $\lambda = 254$  nm)

### Racemic sample 2q:

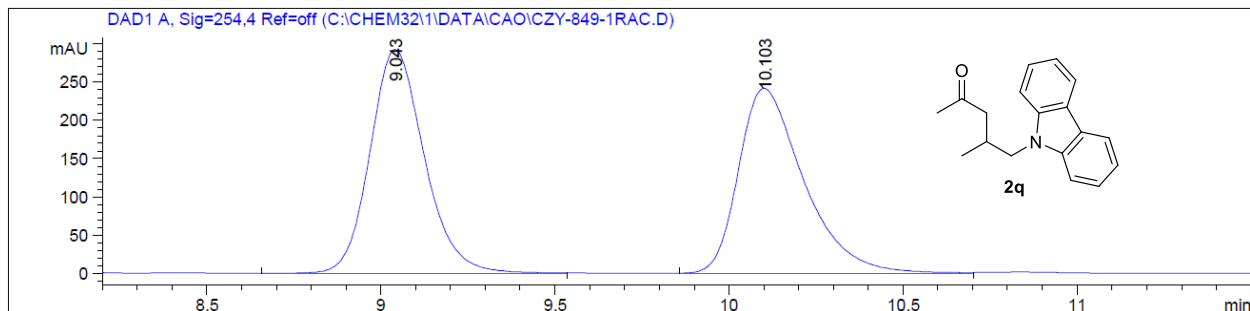

Signal 1: DAD1 A, Sig=254,4 Ref=off

| Peak # | RetTime [min] | Type | Width [min] | Area [mAU*s] | Height [mAU] | Area %  |
|--------|---------------|------|-------------|--------------|--------------|---------|
| 1      | 9.043         | VB   | 0.1667      | 3176.43896   | 292.41522    | 50.2434 |
| 2      | 10.103        | BB   | 0.1960      | 3145.66284   | 241.48729    | 49.7566 |

Totals : 6322.10181 533.90251

### Enantioenriched sample 2q:

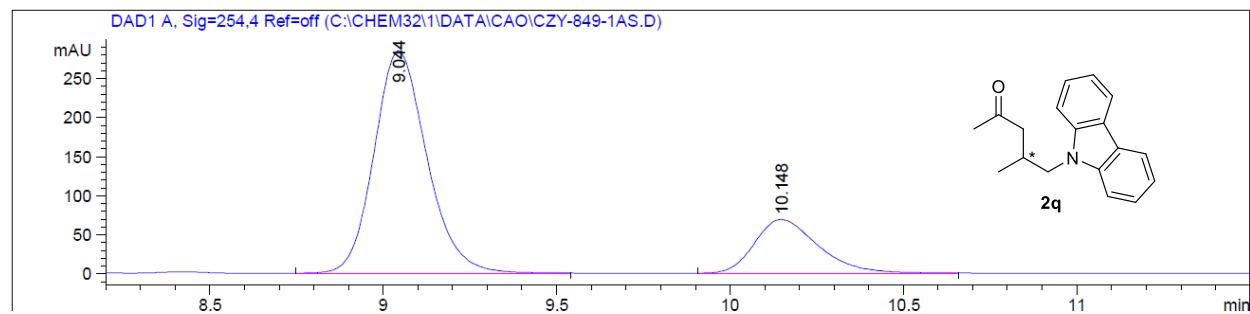

Signal 1: DAD1 A, Sig=254,4 Ref=off

| Peak # | RetTime [min] | Type | Width [min] | Area [mAU*s] | Height [mAU] | Area %  |
|--------|---------------|------|-------------|--------------|--------------|---------|
| 1      | 9.044         | BB   | 0.1640      | 3025.33545   | 284.66684    | 77.4145 |
| 2      | 10.148        | BB   | 0.1955      | 882.63629    | 68.89301     | 22.5855 |

Totals : 3907.97174 353.55984

**Supplementary Figure 64.** HPLC spectra for compound 2q

**Condition:** HPLC (Daicel Chiralpak IC-3 column, 90:10 hexane/*i*PrOH, flow rate: 1.00 mL/min,  $\lambda = 215$  nm)

**Racemic sample 2r:**

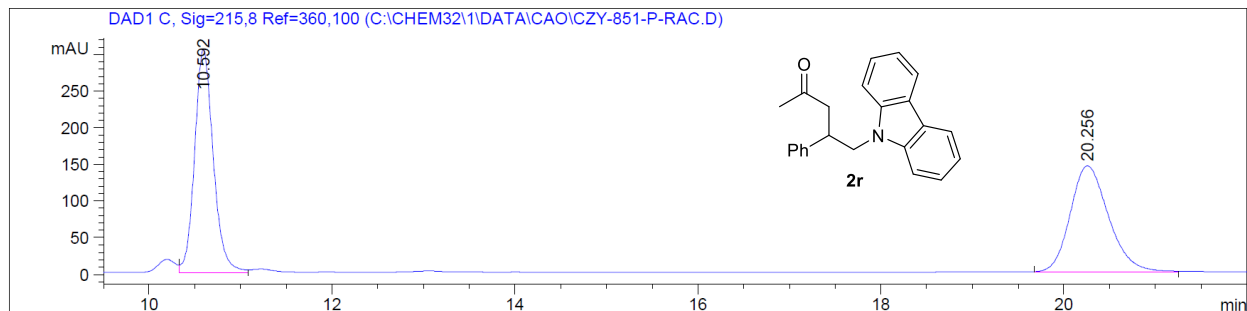

Signal 3: DAD1 C, Sig=215,8 Ref=360,100

| Peak # | RetTime [min] | Type | Width [min] | Area [mAU*s] | Height [mAU] | Area %  |
|--------|---------------|------|-------------|--------------|--------------|---------|
| 1      | 10.592        | VV   | 0.2155      | 4320.49512   | 304.50745    | 50.6765 |
| 2      | 20.256        | BB   | 0.4469      | 4205.14062   | 144.76852    | 49.3235 |

Totals : 8525.63574 449.27597

**Enantioenriched sample 2r:**

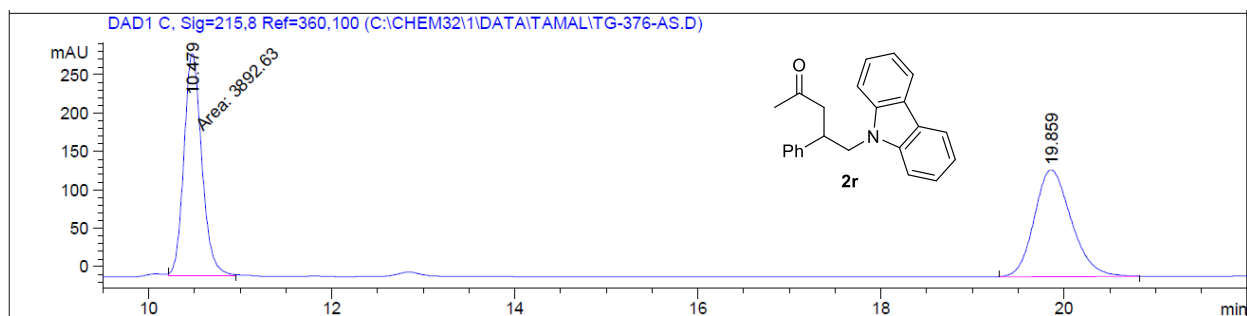

Signal 3: DAD1 C, Sig=215,8 Ref=360,100

| Peak # | RetTime [min] | Type | Width [min] | Area [mAU*s] | Height [mAU] | Area %  |
|--------|---------------|------|-------------|--------------|--------------|---------|
| 1      | 10.479        | MM   | 0.2246      | 3892.63135   | 288.90680    | 49.8966 |
| 2      | 19.859        | BB   | 0.4316      | 3908.76855   | 139.21344    | 50.1034 |

Totals : 7801.39990 428.12024

**Supplementary Figure 65. HPLC spectra for compound 2r**

**Condition:** HPLC (Daicel Chiralpak IC-3 column, 90:10 hexane/*i*PrOH, flow rate: 1.00 mL/min,  $\lambda = 254 \text{ nm}$ )

**Racemic sample 10a:**

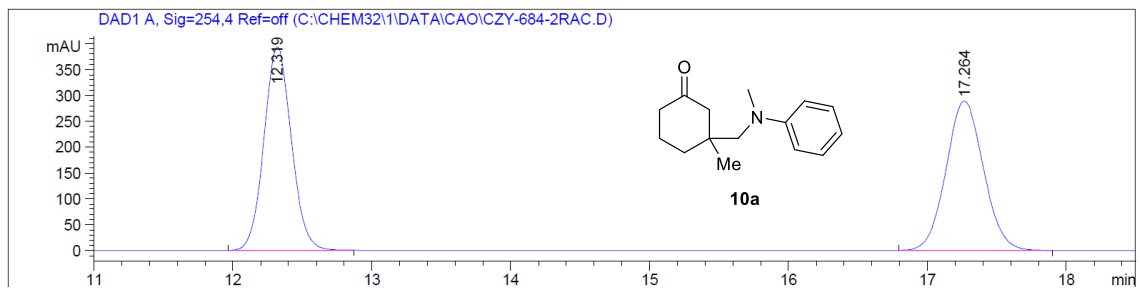

Signal 1: DAD1 A, Sig=254,4 Ref=off

| Peak # | RetTime [min] | Type | Width [min] | Area [mAU*s] | Height [mAU] | Area %  |
|--------|---------------|------|-------------|--------------|--------------|---------|
| 1      | 12.319        | BB   | 0.2142      | 5410.11133   | 393.93042    | 49.9329 |
| 2      | 17.264        | BB   | 0.2910      | 5424.64746   | 288.92307    | 50.0671 |

Totals : 1.08348e4 682.85349

**Enantioenriched sample 10a:**

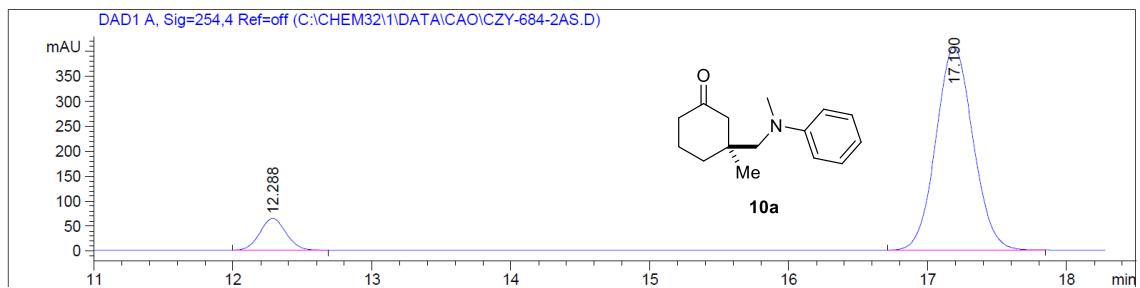

Signal 1: DAD1 A, Sig=254,4 Ref=off

| Peak # | RetTime [min] | Type | Width [min] | Area [mAU*s] | Height [mAU] | Area %  |
|--------|---------------|------|-------------|--------------|--------------|---------|
| 1      | 12.288        | BB   | 0.2038      | 839.46582    | 63.69313     | 9.9694  |
| 2      | 17.190        | BB   | 0.2892      | 7580.99023   | 407.19931    | 90.0306 |

Totals : 8420.45605 470.89244

**Supplementary Figure 66. HPLC spectra for compound 10a**

**Condition:** HPLC (Daicel Chiralpak IC-3 column, 95:5 hexane/*i*PrOH, flow rate: 1.00 mL/min,  $\lambda$  = 254 nm)

**Racemic sample 10b:**

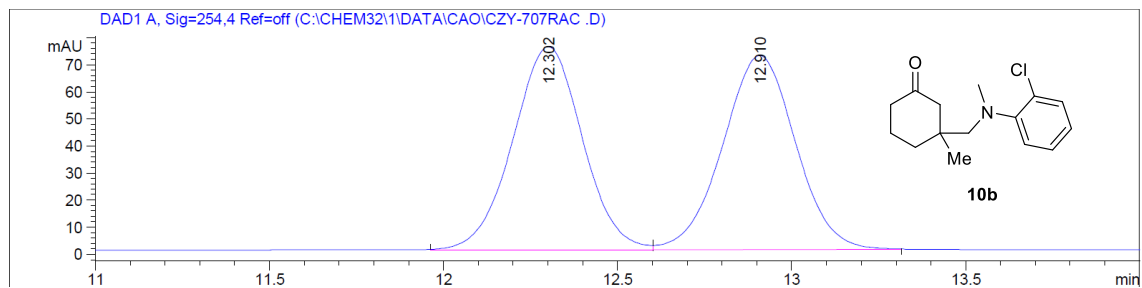

Signal 1: DAD1 A, Sig=254,4 Ref=off

| Peak # | RetTime [min] | Type | Width [min] | Area [mAU*s] | Height [mAU] | Area %  |
|--------|---------------|------|-------------|--------------|--------------|---------|
| 1      | 12.302        | BV   | 0.2160      | 1041.71069   | 75.03359     | 49.9322 |
| 2      | 12.910        | VB   | 0.2261      | 1044.53784   | 71.63832     | 50.0678 |

Totals : 2086.24854 146.67191

**Enantioenriched sample 10b:**

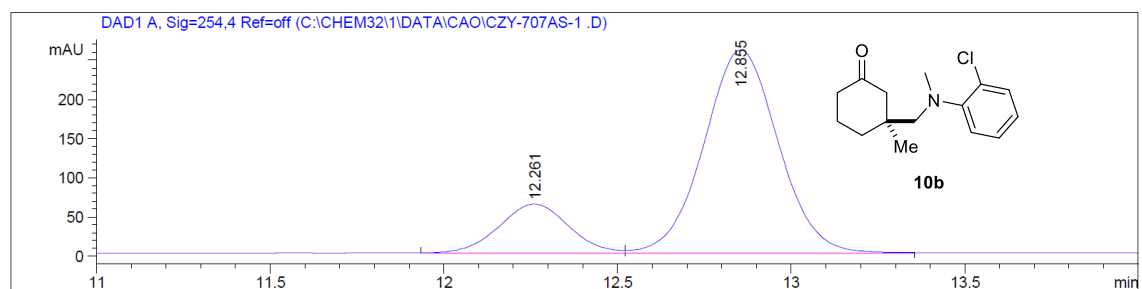

Signal 1: DAD1 A, Sig=254,4 Ref=off

| Peak # | RetTime [min] | Type | Width [min] | Area [mAU*s] | Height [mAU] | Area %  |
|--------|---------------|------|-------------|--------------|--------------|---------|
| 1      | 12.261        | BV   | 0.2160      | 867.07813    | 62.43952     | 18.4054 |
| 2      | 12.855        | VB   | 0.2293      | 3843.91089   | 258.77542    | 81.5946 |

Totals : 4710.98901 321.21494

**Supplementary Figure 67. HPLC spectra for compound 10b**

**Condition:** HPLC (Daicel Chiralpak IC-3 column, 90:10 hexane/*i*PrOH, flow rate: 1.00 mL/min,  $\lambda = 254 \text{ nm}$ )

**Racemic sample 10c:**

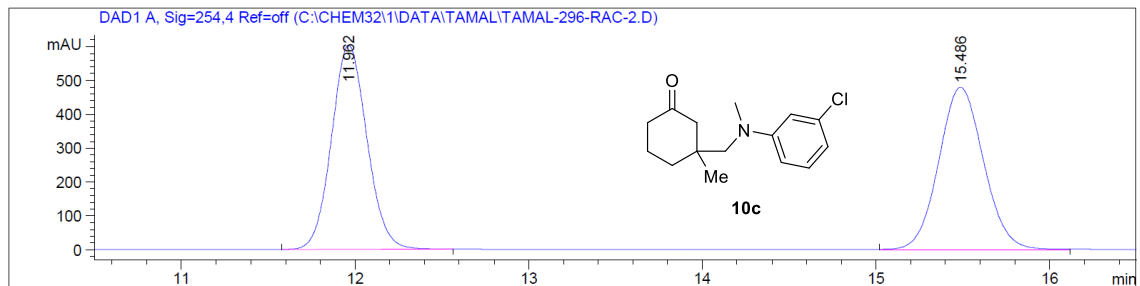

Signal 1: DAD1 A, Sig=254,4 Ref=off

| Peak # | RetTime [min] | Type | Width [min] | Area [mAU*s] | Height [mAU] | Area %  |
|--------|---------------|------|-------------|--------------|--------------|---------|
| 1      | 11.962        | BB   | 0.2215      | 8570.57422   | 604.05499    | 50.0217 |
| 2      | 15.486        | BB   | 0.2786      | 8563.12891   | 478.90897    | 49.9783 |

Totals : 1.71337e4 1082.96396

**Enantioenriched sample 10c:**

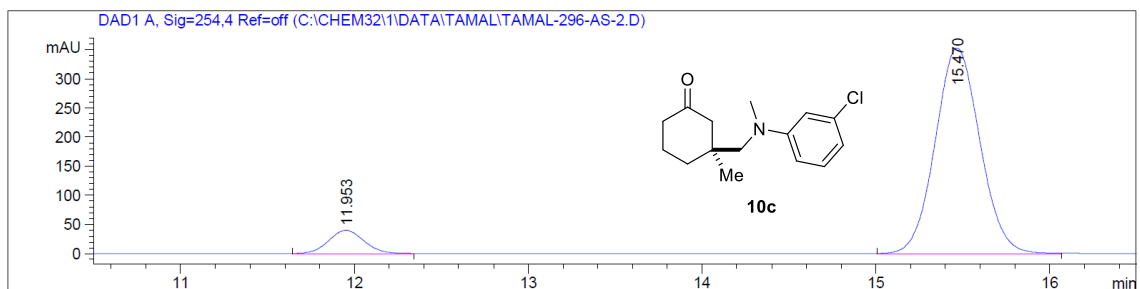

Signal 1: DAD1 A, Sig=254,4 Ref=off

| Peak # | RetTime [min] | Type | Width [min] | Area [mAU*s] | Height [mAU] | Area %  |
|--------|---------------|------|-------------|--------------|--------------|---------|
| 1      | 11.953        | BB   | 0.2212      | 566.16919    | 39.97834     | 8.2499  |
| 2      | 15.470        | BB   | 0.2783      | 6296.59180   | 352.74298    | 91.7501 |

Totals : 6862.76099 392.72132

**Supplementary Figure 68. HPLC spectra for compound 10c**

**Condition:** HPLC (Daicel Chiralpak IC-3 column, 90:10 hexane/*i*PrOH, flow rate: 1.00 mL/min,  $\lambda = 254$  nm)

**Racemic sample 10d:**

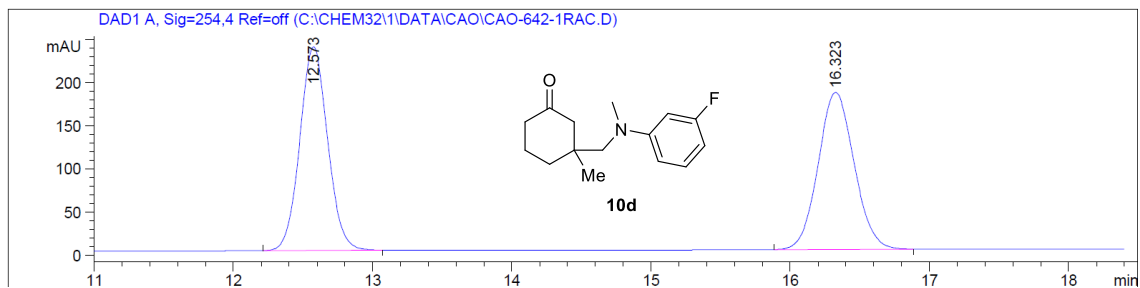

Signal 1: DAD1 A, Sig=254,4 Ref=off

| Peak # | RetTime [min] | Type | Width [min] | Area [mAU*s] | Height [mAU] | Area %  |
|--------|---------------|------|-------------|--------------|--------------|---------|
| 1      | 12.573        | BB   | 0.2145      | 3287.36304   | 236.08261    | 50.0839 |
| 2      | 16.323        | BB   | 0.2800      | 3276.34668   | 182.04158    | 49.9161 |

Totals : 6563.70972 418.12419

**Enantioenriched sample 10d:**

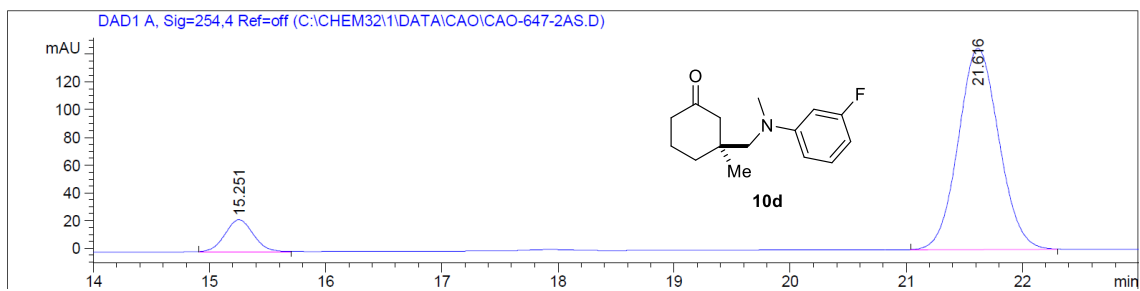

Signal 1: DAD1 A, Sig=254,4 Ref=360,100

| Peak # | RetTime [min] | Type | Width [min] | Area [mAU*s] | Height [mAU] | Area %  |
|--------|---------------|------|-------------|--------------|--------------|---------|
| 1      | 12.833        | BB   | 0.2257      | 3436.17041   | 233.41516    | 10.6497 |
| 2      | 16.624        | BB   | 0.2988      | 2.88292e4    | 1496.39490   | 89.3503 |

Totals : 3.22653e4 1729.81006

**Supplementary Figure 69. HPLC spectra for compound 10d**



**Condition:** HPLC (Daicel Chiralpak IC-3 column, 85:15 hexane/*i*PrOH, flow rate: 1.00 mL/min,  $\lambda = 254$  nm)

**Racemic sample 10e:**

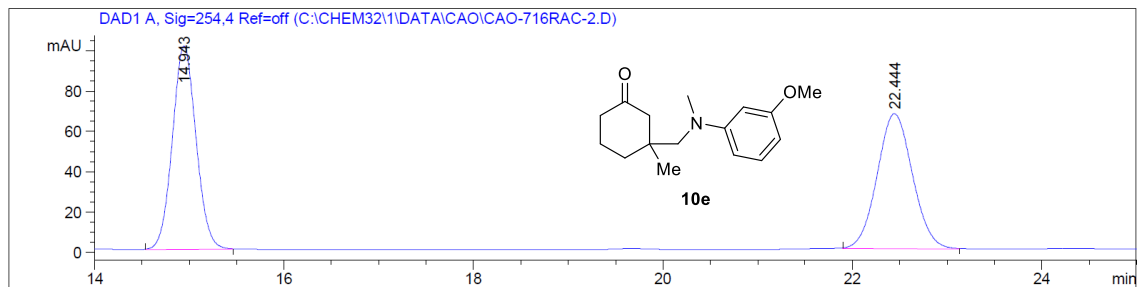

Signal 1: DAD1 A, Sig=254,4 Ref=off

| Peak # | RetTime [min] | Type | Width [min] | Area [mAU*s] | Height [mAU] | Area %  |
|--------|---------------|------|-------------|--------------|--------------|---------|
| 1      | 14.943        | BB   | 0.2703      | 1748.85840   | 100.84283    | 50.2020 |
| 2      | 22.444        | BB   | 0.4026      | 1734.78662   | 66.88544     | 49.7980 |

Totals : 3483.64502 167.72827

**Enantioenriched sample 10e:**

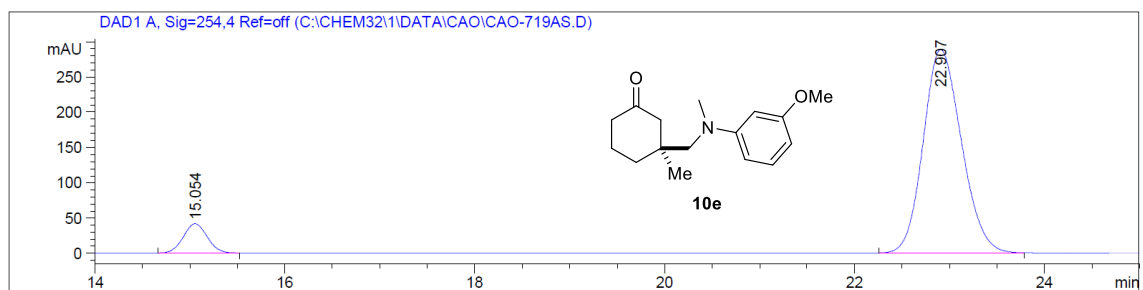

Signal 1: DAD1 A, Sig=254,4 Ref=off

| Peak # | RetTime [min] | Type | Width [min] | Area [mAU*s] | Height [mAU] | Area %  |
|--------|---------------|------|-------------|--------------|--------------|---------|
| 1      | 15.054        | BB   | 0.2724      | 737.66089    | 41.69281     | 8.3603  |
| 2      | 22.907        | BB   | 0.4328      | 8085.70703   | 288.64108    | 91.6397 |

Totals : 8823.36792 330.33389

**Supplementary Figure 70. HPLC spectra for compound 10e**

**Condition:** HPLC (Daicel Chiralpak IC-3 column, 90:10 hexane/*i*PrOH, flow rate: 1.00 mL/min,  $\lambda = 254 \text{ nm}$ )

**Racemic sample 10f:**

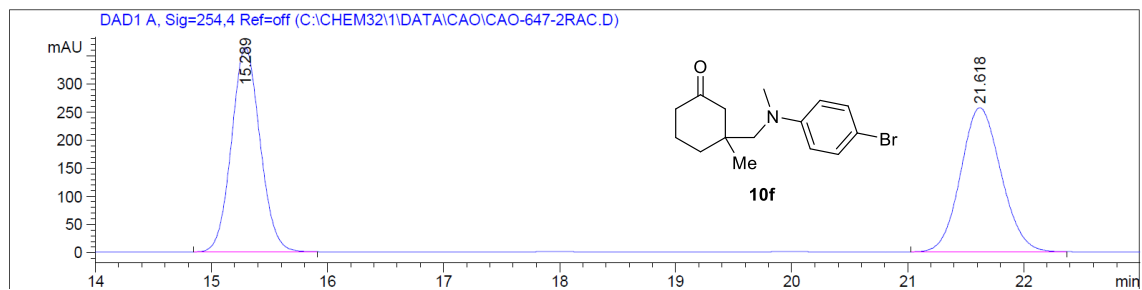

Signal 1: DAD1 A, Sig=254,4 Ref=off

| Peak # | RetTime [min] | Type | Width [min] | Area [mAU*s] | Height [mAU] | Area %  |
|--------|---------------|------|-------------|--------------|--------------|---------|
| 1      | 15.289        | BB   | 0.2657      | 6233.47656   | 364.25131    | 49.9975 |
| 2      | 21.618        | BB   | 0.3751      | 6234.10938   | 256.93427    | 50.0025 |

Totals : 1.24676e4 621.18558

**Enantioenriched sample 10f:**

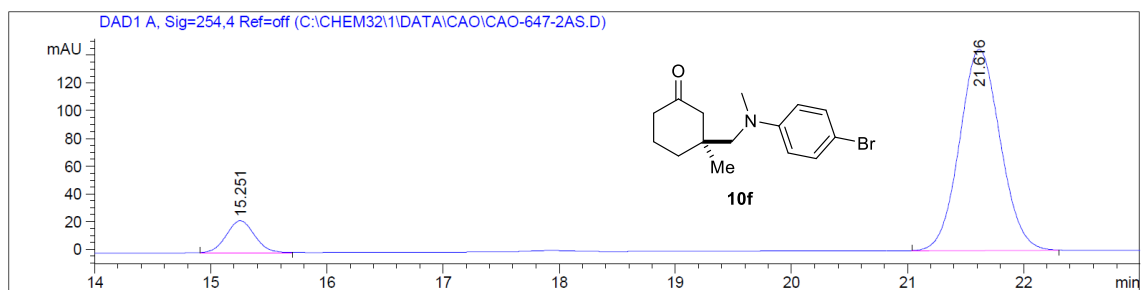

Signal 1: DAD1 A, Sig=254,4 Ref=off

| Peak # | RetTime [min] | Type | Width [min] | Area [mAU*s] | Height [mAU] | Area %  |
|--------|---------------|------|-------------|--------------|--------------|---------|
| 1      | 15.251        | BB   | 0.2614      | 390.80927    | 23.09367     | 9.9518  |
| 2      | 21.616        | BB   | 0.3779      | 3536.20215   | 145.29626    | 90.0482 |

Totals : 3927.01141 168.38993

**Supplementary Figure 71. HPLC spectra for compound 10f**

**Condition:** HPLC (Daicel Chiralpak IC-3 column, 90:10 hexane/*i*PrOH, flow rate: 1.00 mL/min,  $\lambda = 254 \text{ nm}$ )

**Racemic sample 10g:**

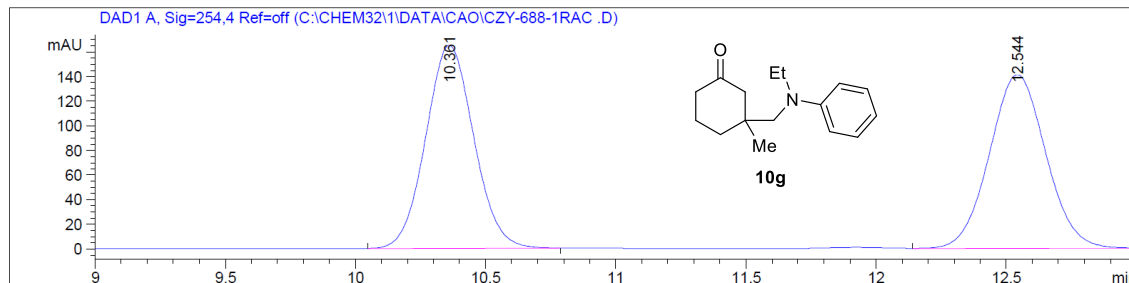

Signal 1: DAD1 A, Sig=254,4 Ref=off

| Peak # | RetTime [min] | Type | Width [min] | Area [mAU*s] | Height [mAU] | Area %  |
|--------|---------------|------|-------------|--------------|--------------|---------|
| 1      | 10.361        | BB   | 0.2000      | 2122.39941   | 165.03960    | 50.0063 |
| 2      | 12.544        | VB   | 0.2334      | 2121.86743   | 141.13148    | 49.9937 |

Totals : 4244.26685 306.17108

**Enantioenriched sample 10g:**

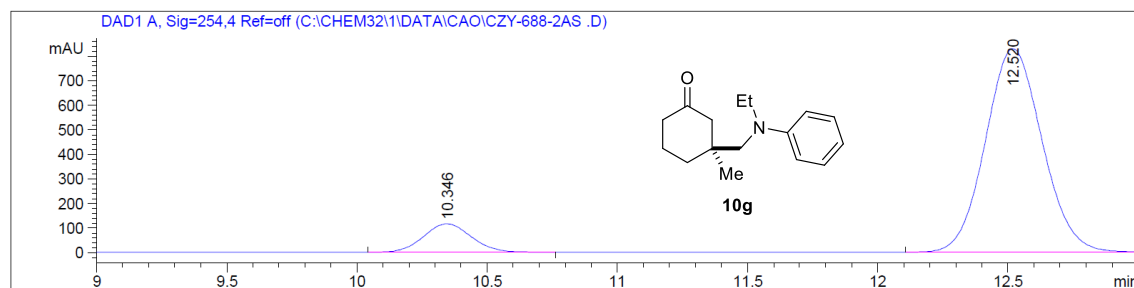

Signal 1: DAD1 A, Sig=254,4 Ref=off

| Peak # | RetTime [min] | Type | Width [min] | Area [mAU*s] | Height [mAU] | Area %  |
|--------|---------------|------|-------------|--------------|--------------|---------|
| 1      | 10.346        | BB   | 0.1994      | 1486.55383   | 116.12269    | 10.5908 |
| 2      | 12.520        | BB   | 0.2347      | 1.25498e4    | 828.79462    | 89.4092 |

Totals : 1.40363e4 944.91730

**Supplementary Figure 72. HPLC spectra for compound 10g**

**Condition:** HPLC (Daicel Chiralpak IC-3 column, 90:10 hexane/*i*PrOH, flow rate: 1.00 mL/min,  $\lambda = 254 \text{ nm}$ )

**Racemic sample 10h:**

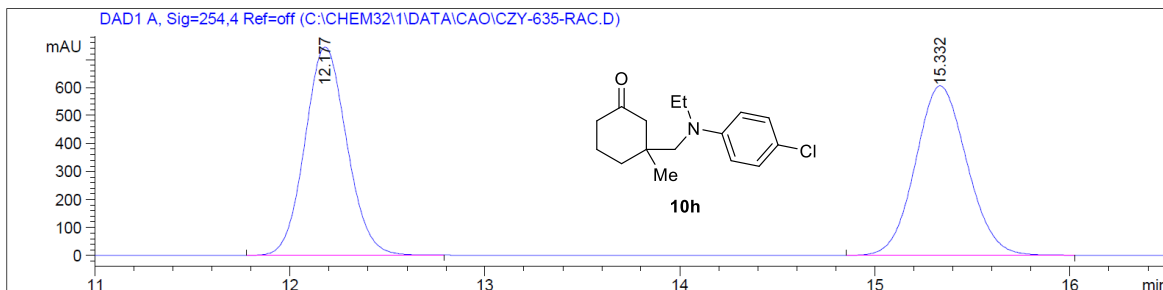

Signal 1: DAD1 A, Sig=254,4 Ref=off

| Peak # | RetTime [min] | Type | Width [min] | Area [mAU*s] | Height [mAU] | Area %  |
|--------|---------------|------|-------------|--------------|--------------|---------|
| 1      | 12.177        | BB   | 0.2324      | 1.11246e4    | 744.39746    | 49.9557 |
| 2      | 15.332        | BB   | 0.2866      | 1.11443e4    | 605.86829    | 50.0443 |

Totals : 2.22688e4 1350.26575

**Enantioenriched sample 10h:**

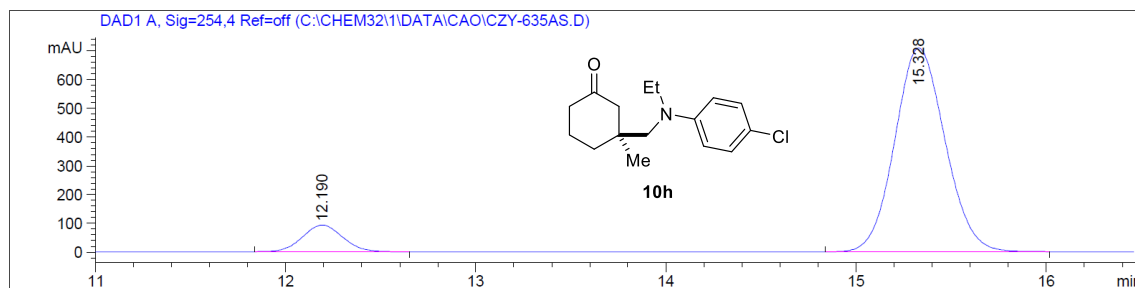

Signal 1: DAD1 A, Sig=254,4 Ref=off

| Peak # | RetTime [min] | Type | Width [min] | Area [mAU*s] | Height [mAU] | Area %  |
|--------|---------------|------|-------------|--------------|--------------|---------|
| 1      | 12.190        | BB   | 0.2292      | 1381.30042   | 93.03397     | 9.5818  |
| 2      | 15.328        | BB   | 0.2867      | 1.30345e4    | 708.31348    | 90.4182 |

Totals : 1.44158e4 801.34745

**Supplementary Figure 73. HPLC spectra for compound 10h**

**Condition:** HPLC (Daicel Chiralpak IC-3 column, 90:10 hexane/*i*PrOH, flow rate: 1.00 mL/min,  $\lambda = 254$  nm)

**Racemic sample 10i:**

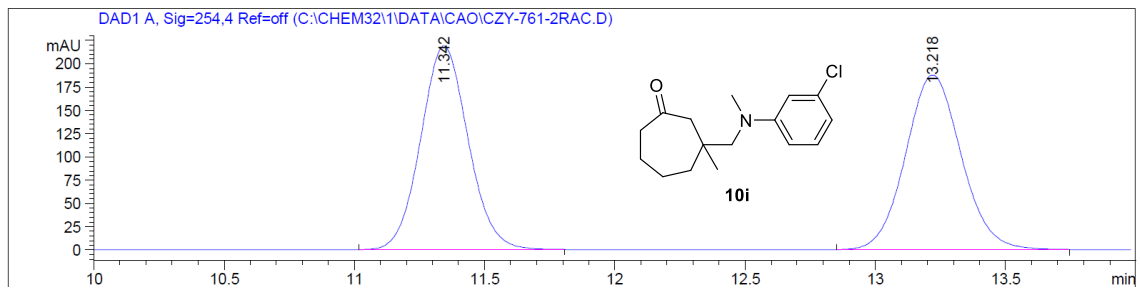

Signal 1: DAD1 A, Sig=254,4 Ref=off

| Peak # | RetTime [min] | Type | Width [min] | Area [mAU*s] | Height [mAU] | Area %  |
|--------|---------------|------|-------------|--------------|--------------|---------|
| 1      | 11.342        | BB   | 0.1962      | 2781.48218   | 219.03716    | 49.8587 |
| 2      | 13.218        | BB   | 0.2318      | 2797.24536   | 187.77988    | 50.1413 |

Totals : 5578.72754 406.81703

**Enantioenriched sample 10i:**

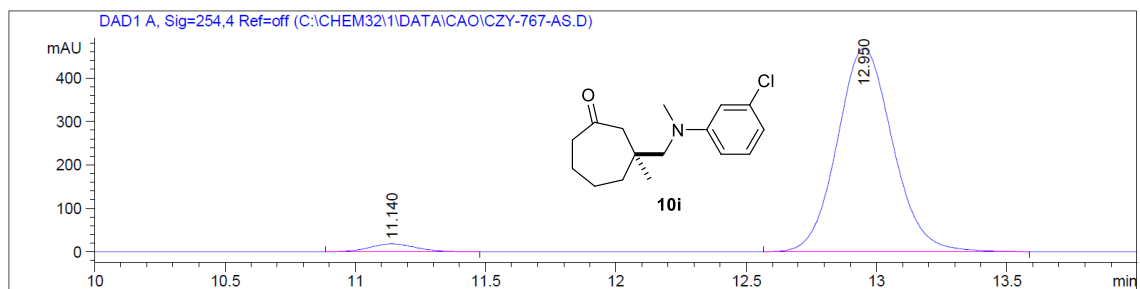

Signal 1: DAD1 A, Sig=254,4 Ref=off

| Peak # | RetTime [min] | Type | Width [min] | Area [mAU*s] | Height [mAU] | Area %  |
|--------|---------------|------|-------------|--------------|--------------|---------|
| 1      | 11.140        | BB   | 0.1958      | 232.55956    | 18.35465     | 3.2516  |
| 2      | 12.950        | BB   | 0.2287      | 6919.67285   | 467.44443    | 96.7484 |

Totals : 7152.23241 485.79907

**Supplementary Figure 74. HPLC spectra for compound 10i**

Condition: HPLC (Daicel Chiralpak IC-3: 90/10 hexane/IPA, flow rate 1.0 mL/min,  $\lambda = 254$  nm)

### Racemic sample 12:

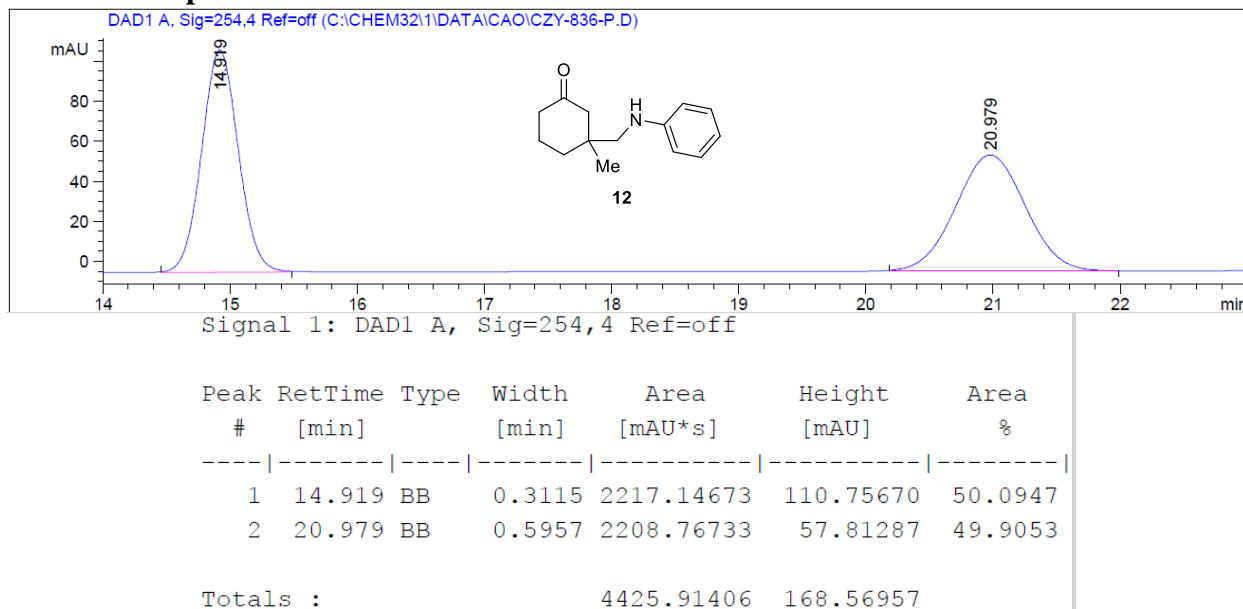

### Enantioenriched sample 12:

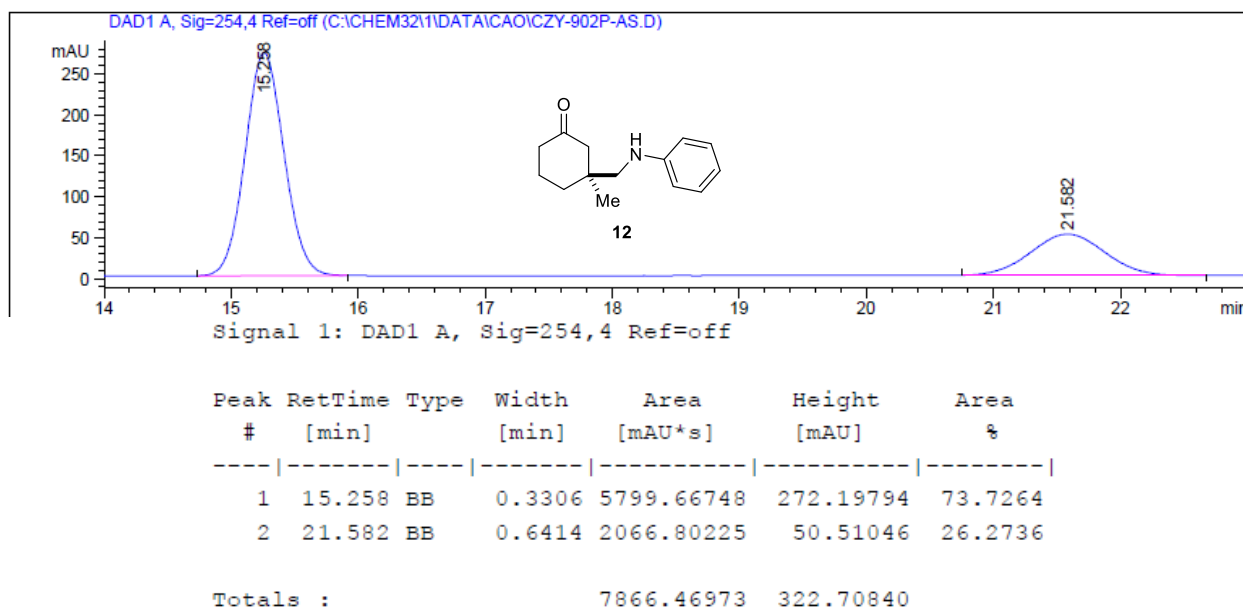

Supplementary Figure 75. HPLC spectra for compound 12

Condition: HPLC (Daicel Chiralpak IC-3: 90/10 hexane/IPA, flow rate 1.0 mL/min,  $\lambda = 215$  nm)

### Racemic sample 14:

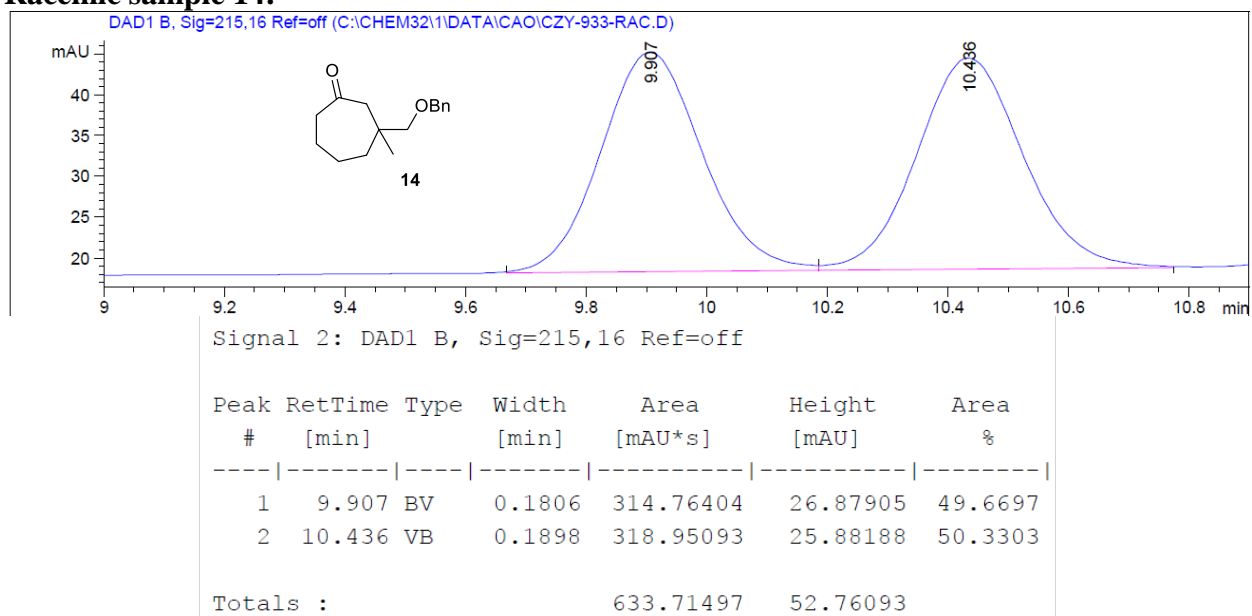

### Enantioenriched sample 14:

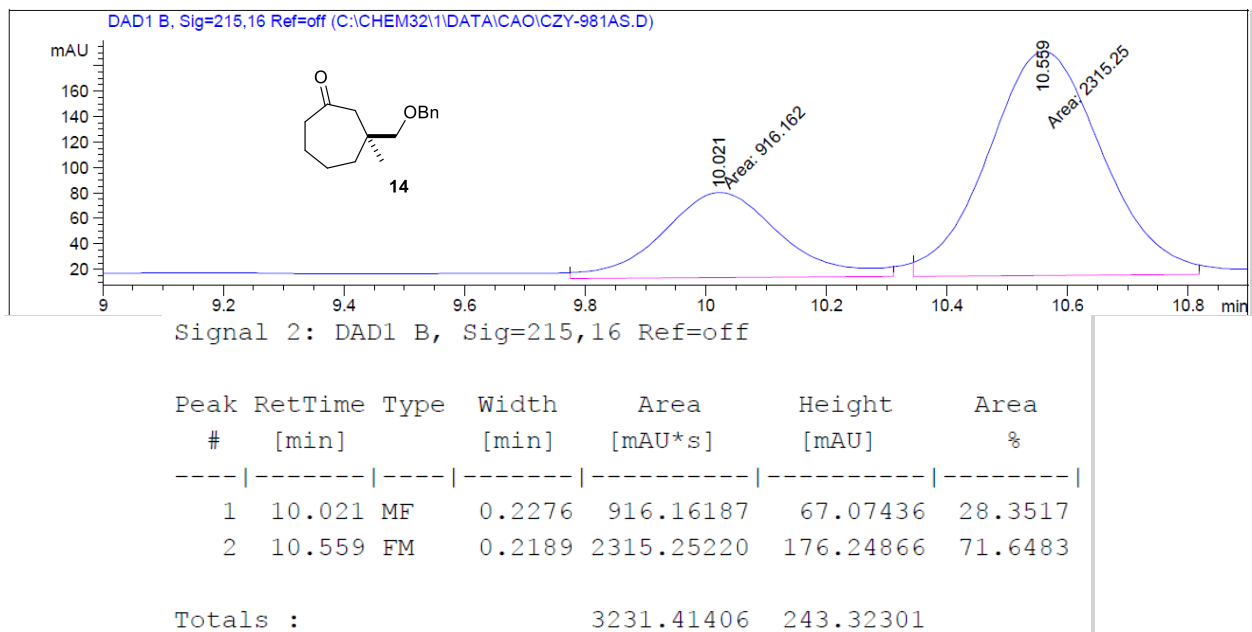

Supplementary Figure 76. HPLC spectra for compound 14

Condition: HPLC (Daicel Chiralpak IC-3: 90/10 hexane/IPA, flow rate 1.0 mL/min,  $\lambda = 254$  nm)

### Racemic sample 10s:

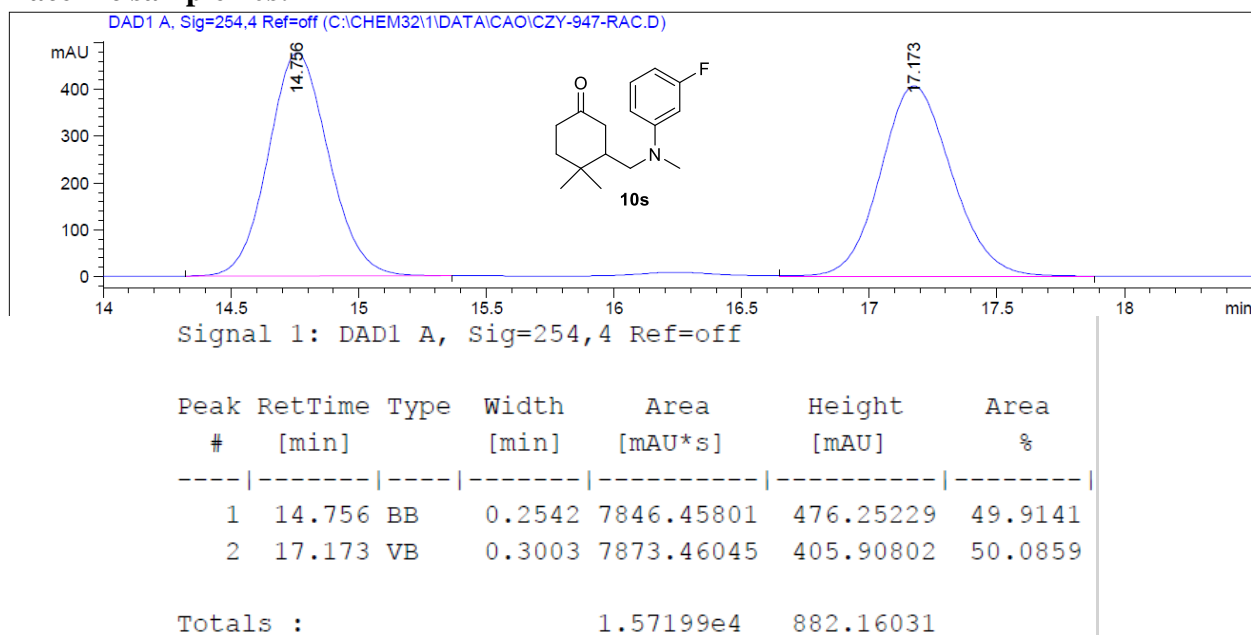

### Enantioenriched sample 10s:

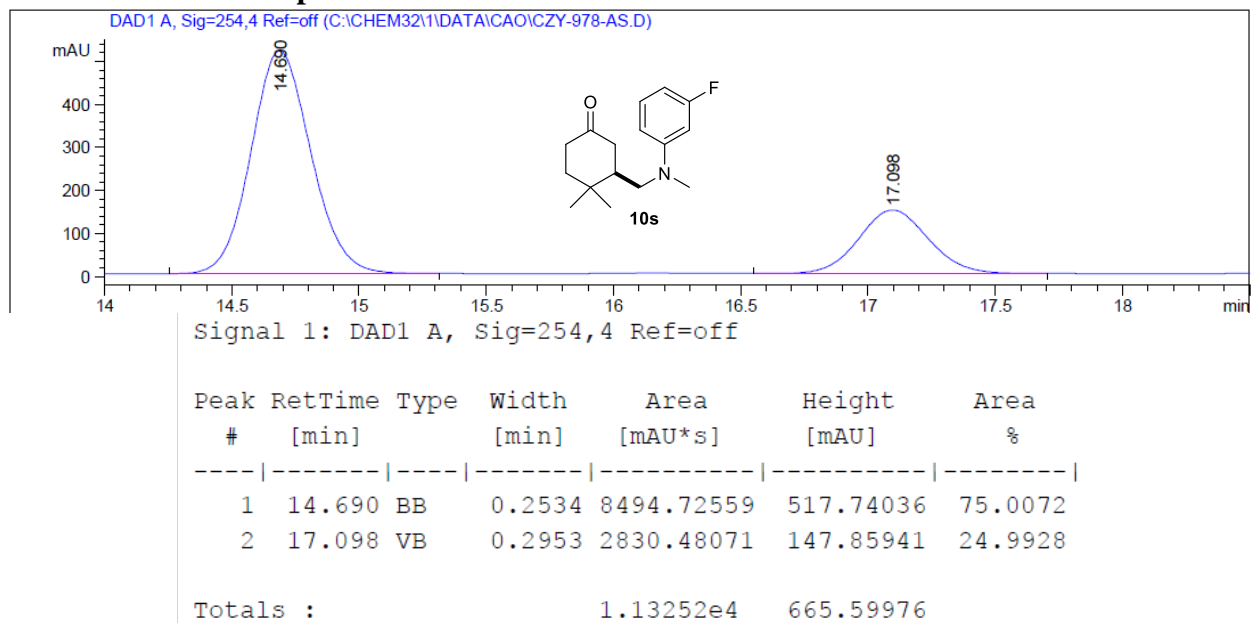

Supplementary Figure 77. HPLC spectra for compound 10s



**Condition:** UPC<sup>2</sup> (Acquity Trefoil IB column with a gradient (100% CO<sub>2</sub> to 60/40 CO<sub>2</sub>/MeOH over 2 minutes, curve 6), flow rate 3 mL/min,  $\lambda = 230$  nm)

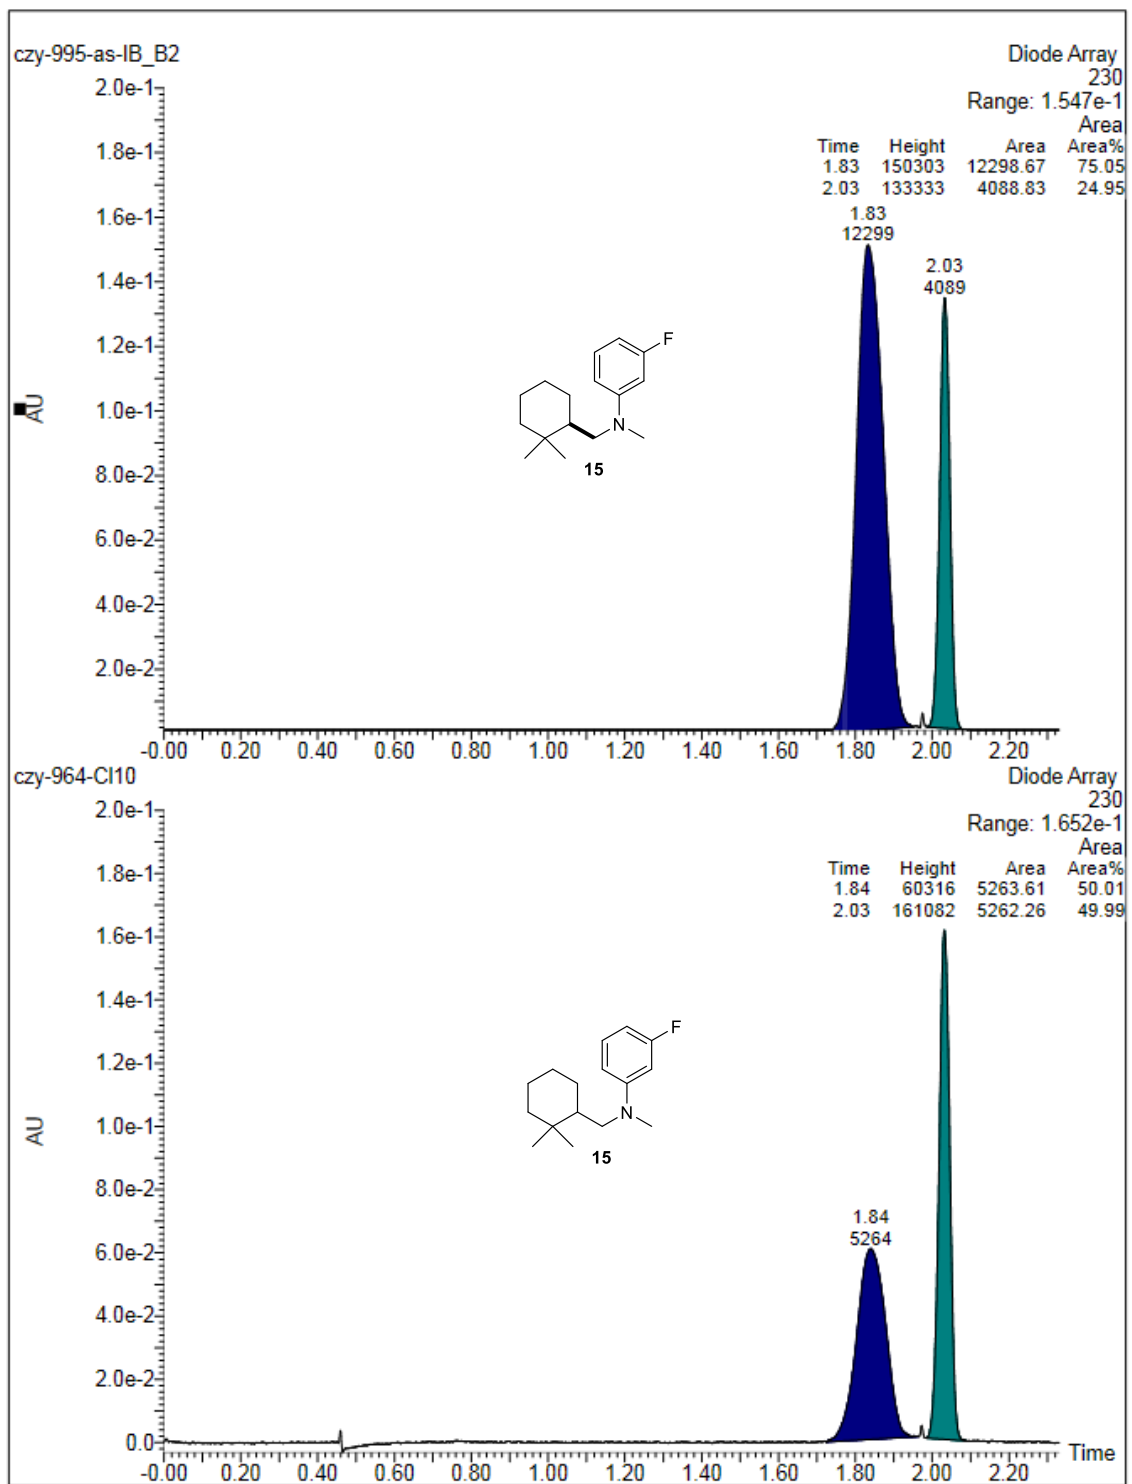

**Supplementary Figure 78.** UPC<sup>2</sup> spectra for compound 15

Condition: HPLC (Daicel Chiralpak IC-3: 90/10 hexane/IPA, flow rate 1.0 mL/min,  $\lambda = 230$  nm)

### Racemic sample 10t:

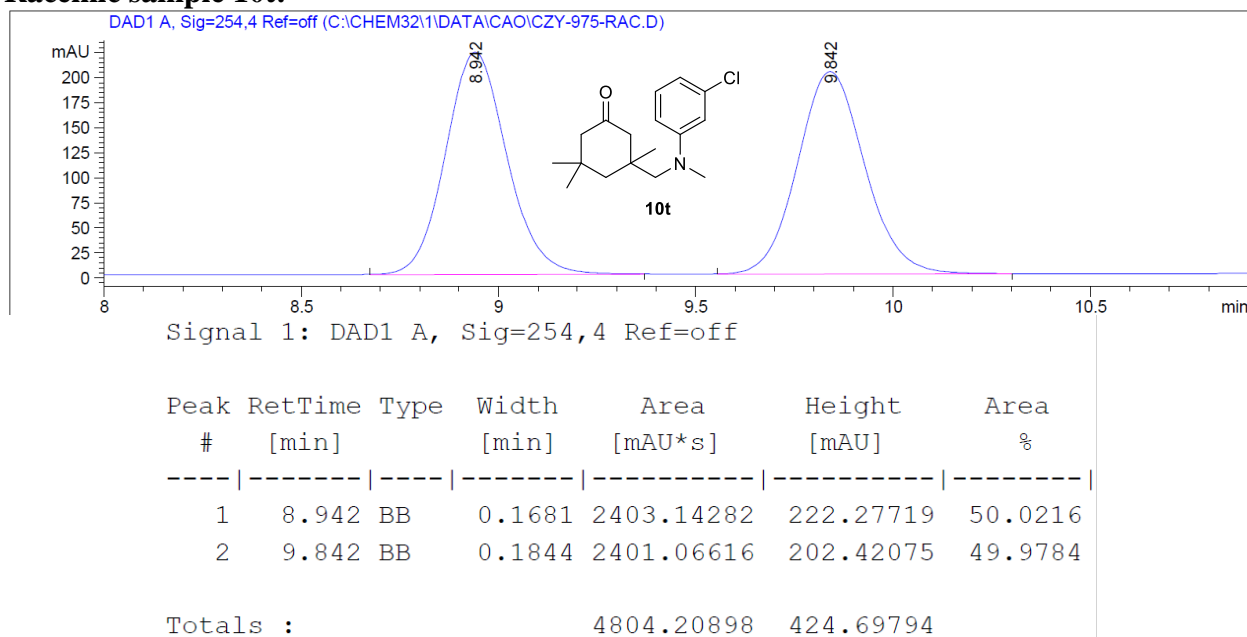

### Enantioenriched sample 10t:

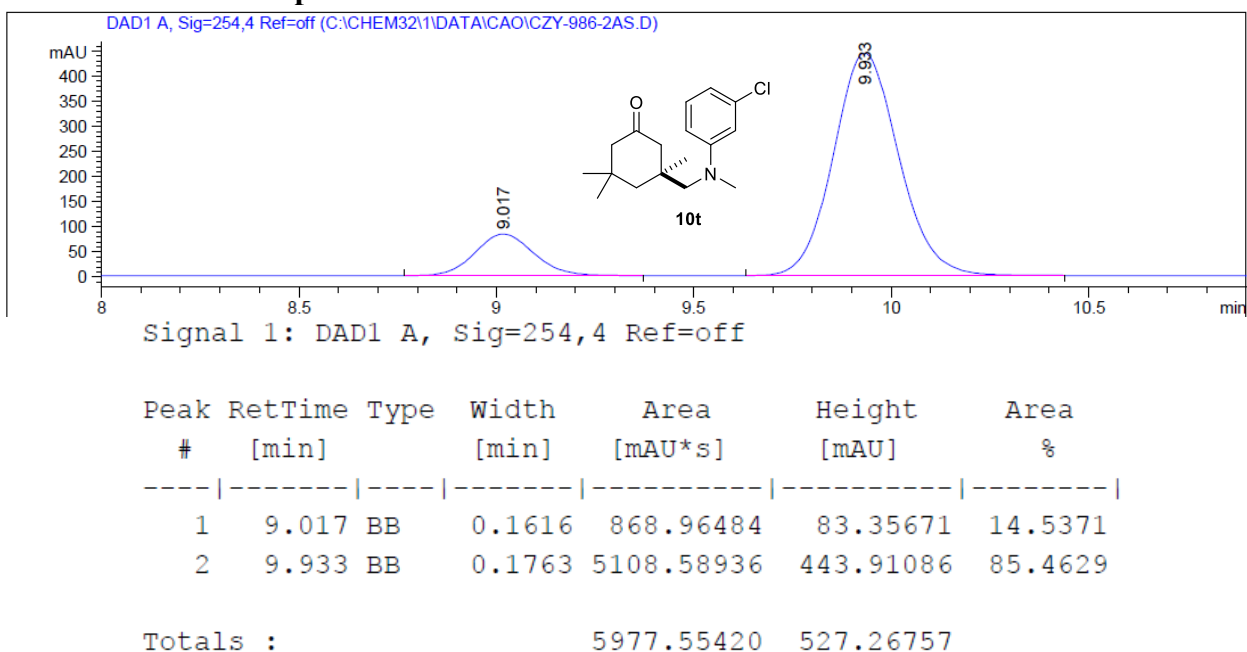

Supplementary Figure 79. HPLC spectra for compound 10t

**Condition:** UPC<sup>2</sup> (Acquity Trefoil CEL1 column with a gradient (100% CO<sub>2</sub> to 60/40 CO<sub>2</sub>/MeOH over 6 minutes, curve 6), flow rate 2 mL/min,  $\lambda$  = 215 nm)

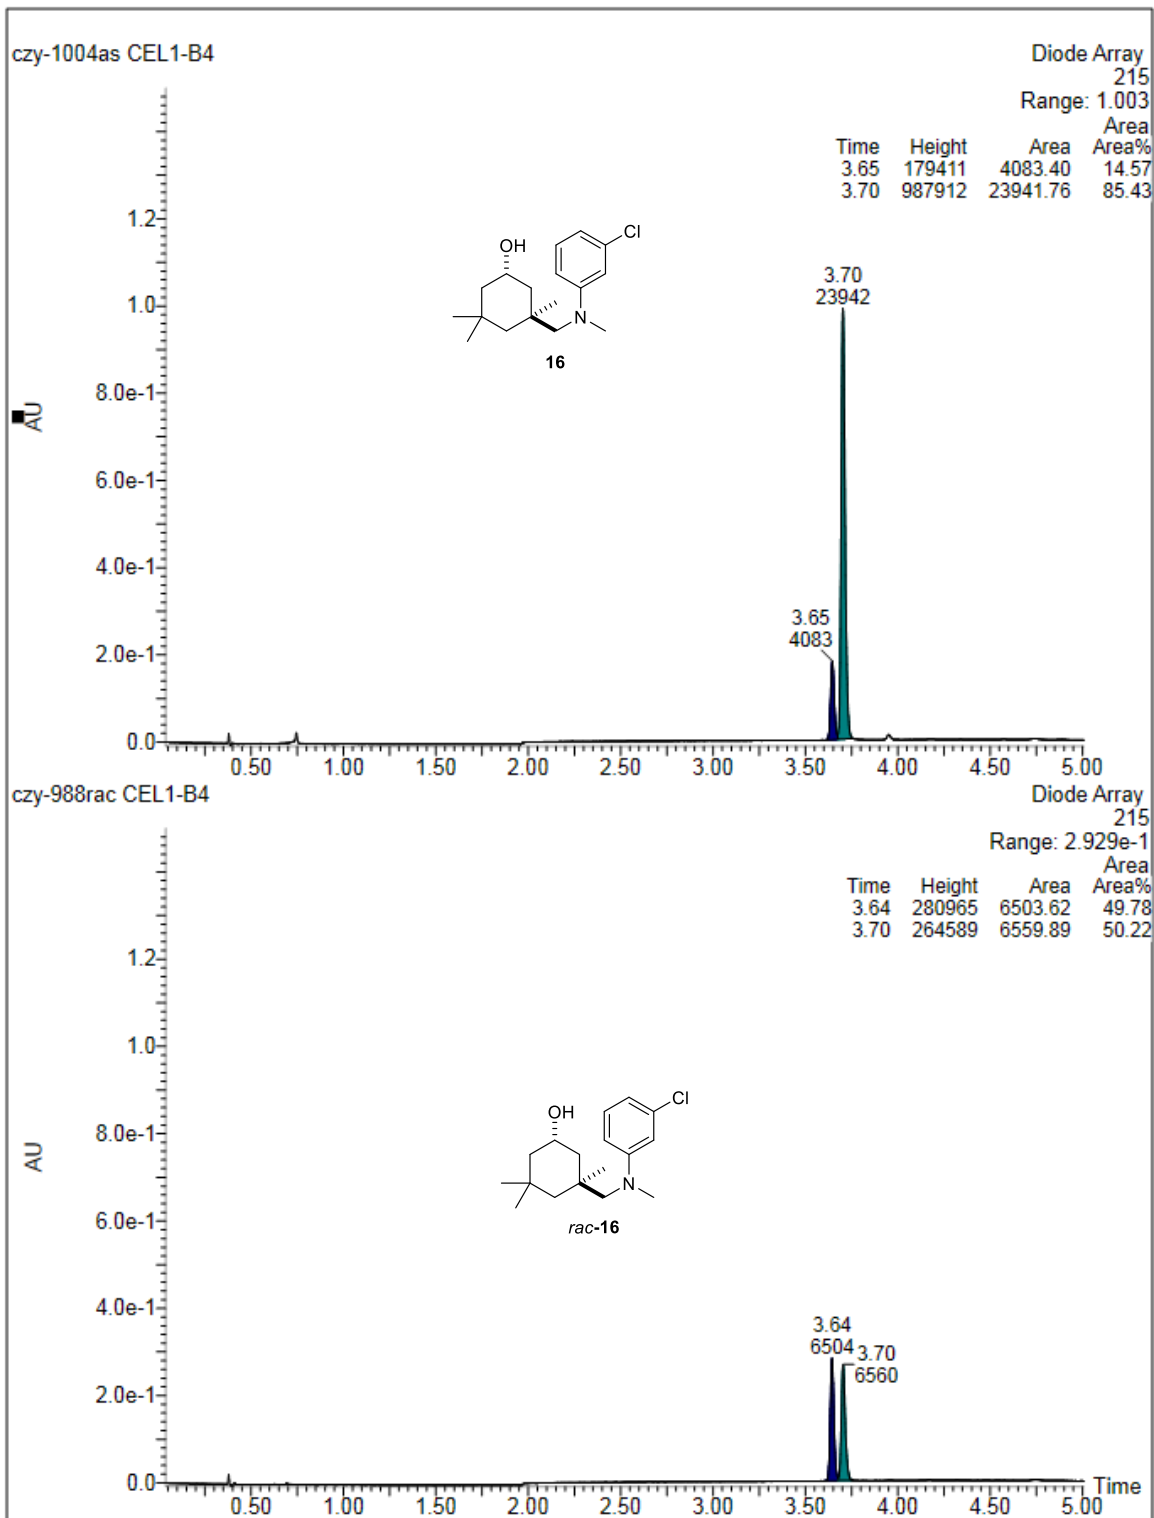

**Supplementary Figure 80.** UPC<sup>2</sup> spectra for compound **16**

## Single Crystal X-ray Diffraction Data for the Product 2a

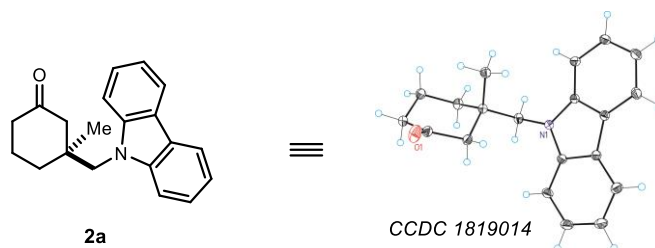

**Supplementary Figure 81.** Single crystal X-ray diffraction data and determination of the absolute configuration of **2a** (CCDC 1819014). Crystals of the compound **2a** were obtained by slow evaporation of a CH<sub>3</sub>CN solution. *Data Collection.* Measurements were made on a Bruker-Nonius diffractometer equipped with an APPEX 24K CCD area detector, a FR591 rotating anode with MoK $\alpha$  radiation, Montel mirrors and a Cryostream Plus low temperature device ( $T = 100\text{K}$ ). Full-sphere data collection was used with  $\omega$  and  $\phi$  scans.

## Supplementary Tables

**Supplementary Table 1.** Crystal data and structure refinement for **2a**.

|                                   |                                             |          |
|-----------------------------------|---------------------------------------------|----------|
| Empirical formula                 | C <sub>20</sub> H <sub>21</sub> N O         |          |
| Formula weight                    | 291.38                                      |          |
| Temperature                       | 100(2) K                                    |          |
| Wavelength                        | 0.71073 Å                                   |          |
| Crystal system                    | Orthorhombic                                |          |
| Space group                       | P2(1)2(1)2(1)                               |          |
| Unit cell dimensions              | a = 5.97270(5)Å                             | a = 90°. |
|                                   | b = 14.47004(13)Å                           | b = 90°. |
|                                   | c = 17.80667(17)Å                           | g = 90°. |
| Volume                            | 1538.95(2) Å <sup>3</sup>                   |          |
| Z                                 | 4                                           |          |
| Density (calculated)              | 1.258 Mg/m <sup>3</sup>                     |          |
| Absorption coefficient            | 0.076 mm <sup>-1</sup>                      |          |
| F(000)                            | 624                                         |          |
| Crystal size                      | 0.2 x 0.2 x 0.05 mm <sup>3</sup>            |          |
| Theta range for data collection   | 1.813 to 53.017°.                           |          |
| Index ranges                      | -12<=h<=13,-32<=k<=25,-18<=l<=39            |          |
| Reflections collected             | 55982                                       |          |
| Independent reflections           | 18128[R(int) = 0.0170]                      |          |
| Completeness to theta =53.017°    | 99.6%                                       |          |
| Absorption correction             | Multi-scan                                  |          |
| Max. and min. transmission        | 0.996 and 0.766                             |          |
| Refinement method                 | Full-matrix least-squares on F <sup>2</sup> |          |
| Data / restraints / parameters    | 18128/ 0/ 283                               |          |
| Goodness-of-fit on F <sup>2</sup> | 1.031                                       |          |
| Final R indices [I>2sigma(I)]     | R1 = 0.0310, wR2 = 0.0800                   |          |
| R indices (all data)              | R1 = 0.0373, wR2 = 0.0833                   |          |
| Flack parameter                   | x =0.02(13)                                 |          |
| Largest diff. peak and hole       | 0.455 and -0.179 e.Å <sup>-3</sup>          |          |

**Supplementary Table 2.** Bond lengths [Å] and angles [°] for **2a**.

| Bond lengths | Angles    |
|--------------|-----------|
| O1-C16       | 1.2194(6) |
| N1-C1        | 1.3881(5) |
| N1-C12       | 1.3936(5) |
| N1-C13       | 1.4528(5) |
| C1-C2        | 1.3999(5) |
| C1-C6        | 1.4149(5) |
| C2-C3        | 1.3913(6) |
| C2-H2        | 0.973(12) |
| C3-C4        | 1.4053(7) |
| C3-H3        | 0.941(12) |
| C4-C5        | 1.3894(7) |
| C4-H4        | 0.949(16) |
| C5-C6        | 1.3980(5) |
| C5-H5        | 0.963(12) |
| C7-C8        | 1.3997(6) |
| C7-C12       | 1.4129(6) |
| C7-C6        | 1.4429(5) |
| C8-C9        | 1.3905(7) |
| C8-H8        | 0.966(11) |
| C9-C10       | 1.4051(8) |
| C9-H9        | 0.971(13) |
| C10-C11      | 1.3932(7) |
| C10-H10      | 0.944(16) |
| C11-C12      | 1.3979(5) |
| C11-H11      | 0.970(14) |
| C13-C14      | 1.5421(5) |
| C13-H12      | 1.006(12) |
| C13-H13      | 1.005(10) |
| C14-C20      | 1.5329(5) |
| C14-C19      | 1.5389(5) |
| C14-C15      | 1.5419(5) |
| C15-C16      | 1.5167(6) |
| C15-H14      | 0.996(13) |
| C15-H15      | 0.995(12) |
| C16-C17      | 1.5104(6) |
| C17-C18      | 1.5326(7) |
| C17-H16      | 0.929(14) |
| C17-H17      | 0.988(13) |
| C18-C19      | 1.5279(6) |
| C18-H18      | 0.971(13) |
| C18-H19      | 0.977(13) |
| C19-H21      | 0.980(11) |
| C19-H20      | 0.925(14) |
| C20-H22      | 1.026(11) |
| C20-H23      | 0.984(12) |
| C20-H24      | 0.988(12) |
| C1-N1-C12    | 107.91(3) |

|             |           |
|-------------|-----------|
| C1-N1-C13   | 125.79(3) |
| C12-N1-C13  | 125.87(3) |
| N1-C1-C2    | 129.54(4) |
| N1-C1-C6    | 109.42(3) |
| C2-C1-C6    | 121.03(4) |
| C3-C2-C1    | 117.65(4) |
| C3-C2-H2    | 122.3(7)  |
| C1-C2-H2    | 120.1(7)  |
| C2-C3-C4    | 121.79(4) |
| C2-C3-H3    | 122.3(7)  |
| C4-C3-H3    | 115.9(7)  |
| C5-C4-C3    | 120.38(4) |
| C5-C4-H4    | 116.8(9)  |
| C3-C4-H4    | 122.9(9)  |
| C4-C5-C6    | 118.87(4) |
| C4-C5-H5    | 121.1(7)  |
| C6-C5-H5    | 120.0(7)  |
| C8-C7-C12   | 120.27(4) |
| C8-C7-C6    | 133.12(4) |
| C12-C7-C6   | 106.52(3) |
| C5-C6-C1    | 120.25(4) |
| C5-C6-C7    | 133.11(4) |
| C1-C6-C7    | 106.61(3) |
| C9-C8-C7    | 118.65(4) |
| C9-C8-H8    | 119.5(6)  |
| C7-C8-H8    | 121.8(6)  |
| C8-C9-C10   | 120.46(4) |
| C8-C9-H9    | 122.1(9)  |
| C10-C9-H9   | 117.4(9)  |
| C11-C10-C9  | 121.88(4) |
| C11-C10-H10 | 120.8(10) |
| C9-C10-H10  | 117.2(10) |
| C10-C11-C12 | 117.38(4) |
| C10-C11-H11 | 121.9(8)  |
| C12-C11-H11 | 120.7(8)  |
| N1-C12-C11  | 129.20(4) |
| N1-C12-C7   | 109.41(3) |
| C11-C12-C7  | 121.35(4) |
| N1-C13-C14  | 116.81(3) |
| N1-C13-H12  | 108.4(7)  |
| C14-C13-H12 | 107.1(6)  |
| N1-C13-H13  | 109.2(6)  |
| C14-C13-H13 | 108.3(6)  |
| H12-C13-H13 | 106.6(9)  |
| C20-C14-C19 | 110.26(3) |
| C20-C14-C15 | 109.55(3) |
| C19-C14-C15 | 108.49(3) |
| C20-C14-C13 | 110.57(3) |
| C19-C14-C13 | 106.31(3) |
| C15-C14-C13 | 111.58(3) |
| C16-C15-C14 | 110.77(3) |

|             |           |
|-------------|-----------|
| C16-C15-H14 | 107.8(7)  |
| C14-C15-H14 | 111.3(7)  |
| C16-C15-H15 | 107.1(7)  |
| C14-C15-H15 | 108.8(7)  |
| H14-C15-H15 | 110.9(11) |
| O1-C16-C17  | 122.29(4) |
| O1-C16-C15  | 121.96(4) |
| C17-C16-C15 | 115.76(4) |
| C16-C17-C18 | 113.09(3) |
| C16-C17-H16 | 102.8(9)  |
| C18-C17-H16 | 110.5(9)  |
| C16-C17-H17 | 106.6(8)  |
| C18-C17-H17 | 114.7(8)  |
| H16-C17-H17 | 108.3(11) |
| C19-C18-C17 | 111.48(3) |
| C19-C18-H18 | 109.6(7)  |
| C17-C18-H18 | 108.2(7)  |
| C19-C18-H19 | 110.0(8)  |
| C17-C18-H19 | 111.1(8)  |
| H18-C18-H19 | 106.2(11) |
| C18-C19-C14 | 112.39(3) |
| C18-C19-H21 | 107.2(7)  |
| C14-C19-H21 | 110.1(7)  |
| C18-C19-H20 | 111.8(8)  |
| C14-C19-H20 | 109.1(8)  |
| H21-C19-H20 | 106.1(11) |
| C14-C20-H22 | 111.4(6)  |
| C14-C20-H23 | 109.1(7)  |
| H22-C20-H23 | 110.3(9)  |
| C14-C20-H24 | 111.5(7)  |
| H22-C20-H24 | 107.1(9)  |
| H23-C20-H24 | 107.4(10) |

-----  
**Supplementary Table 3.** Torsion angles [°] for **2a**.

|              |            |
|--------------|------------|
| C12-N1-C1-C2 | 175.24(4)  |
| C13-N1-C1-C2 | 2.44(7)    |
| C12-N1-C1-C6 | -3.54(4)   |
| C13-N1-C1-C6 | -176.33(3) |
| N1-C1-C2-C3  | 179.28(4)  |
| C6-C1-C2-C3  | -2.07(6)   |
| C1-C2-C3-C4  | 0.98(7)    |
| C2-C3-C4-C5  | 0.58(7)    |
| C3-C4-C5-C6  | -1.05(7)   |
| C4-C5-C6-C1  | -0.04(6)   |
| C4-C5-C6-C7  | 177.77(4)  |
| N1-C1-C6-C5  | -179.46(4) |
| C2-C1-C6-C5  | 1.64(6)    |
| N1-C1-C6-C7  | 2.21(4)    |
| C2-C1-C6-C7  | -176.69(4) |

|                 |            |
|-----------------|------------|
| C8-C7-C6-C5     | -1.68(8)   |
| C12-C7-C6-C5    | -178.07(4) |
| C8-C7-C6-C1     | 176.34(4)  |
| C12-C7-C6-C1    | -0.05(4)   |
| C12-C7-C8-C9    | 1.15(6)    |
| C6-C7-C8-C9     | -174.84(4) |
| C7-C8-C9-C10    | -0.08(7)   |
| C8-C9-C10-C11   | -0.90(7)   |
| C9-C10-C11-C12  | 0.75(7)    |
| C1-N1-C12-C11   | -174.01(4) |
| C13-N1-C12-C11  | -1.22(7)   |
| C1-N1-C12-C7    | 3.51(4)    |
| C13-N1-C12-C7   | 176.29(3)  |
| C10-C11-C12-N1  | 177.61(4)  |
| C10-C11-C12-C7  | 0.35(6)    |
| C8-C7-C12-N1    | -179.07(4) |
| C6-C7-C12-N1    | -2.12(4)   |
| C8-C7-C12-C11   | -1.32(6)   |
| C6-C7-C12-C11   | 175.63(4)  |
| C1-N1-C13-C14   | -91.11(5)  |
| C12-N1-C13-C14  | 97.36(5)   |
| N1-C13-C14-C20  | 60.05(4)   |
| N1-C13-C14-C19  | 179.74(3)  |
| N1-C13-C14-C15  | -62.16(4)  |
| C20-C14-C15-C16 | 63.91(4)   |
| C19-C14-C15-C16 | -56.51(4)  |
| C13-C14-C15-C16 | -173.30(3) |
| C14-C15-C16-O1  | -128.88(5) |
| C14-C15-C16-C17 | 51.70(5)   |
| O1-C16-C17-C18  | 134.12(5)  |
| C15-C16-C17-C18 | -46.47(5)  |
| C16-C17-C18-C19 | 46.74(5)   |
| C17-C18-C19-C14 | -55.12(5)  |
| C20-C14-C19-C18 | -60.04(4)  |
| C15-C14-C19-C18 | 59.94(4)   |
| C13-C14-C19-C18 | -179.93(3) |

---



## Supplementary Note 1

### Synthesis of the Chiral Primary Amine Catalyst 3e

#### Synthesis of the carbazole precursor

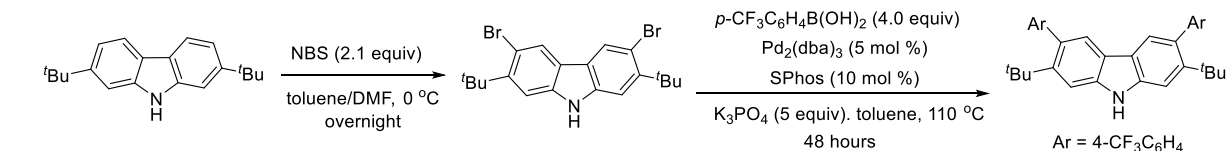

**3,6-dibromo-2,7-di-*tert*-butyl-9H-carbazole** was prepared according to the following procedure: *N*-bromosuccinimide (NBS, 1.85 g, 10.5 mmol, 2.1 equiv) dissolved in DMF (8 mL) was added dropwise over 1 hour to a stirred suspension of 2,7-di-*tert*-butyl-9H-carbazole (1.4 g, 5 mmol, 1 equiv) in toluene (5 mL) at 0 °C. The reaction was stirred at 0 °C overnight, and then the reaction mixture was poured into ice-water (50 mL). Extraction ethyl acetate and concentration under reduced pressure gave a crude mixture. The product was isolated by flash chromatography (hexane/toluene: gradient from 100:0 to 10:1), giving a white solid (2.16 g, 99% yield).

$^1\text{H NMR}$  (500 MHz,  $\text{CDCl}_3$ ):  $\delta$  8.18 (s, 2H), 7.90 (s, br, 1H), 7.50 (s, 2H), 1.60 (s, 18H).

$^{13}\text{C NMR}$  (101 MHz,  $\text{CDCl}_3$ ):  $\delta$  145.7, 139.5, 127.3, 121.8, 113.4, 110.0, 37.2, 30.3.

**HRMS**: Calculated for  $\text{C}_{20}\text{H}_{22}\text{Br}_2\text{N}$  ( $\text{M-H}^+$ ): 434.0124, found: 434.0109.

**2,7-di-*tert*-butyl-3,6-bis(4-(trifluoromethyl)phenyl)-9H-carbazole** was prepared according to a slightly modified literature procedure.<sup>2</sup> A screw-cap Schlenk tube containing a magnetic stirring bar was charged with 3,6-dibromo-2,7-di-*tert*-butyl-9H-carbazole (437 mg, 1.0 mmol), 2-dicyclohexylphosphino-2,6-dimethoxybiphenyl (SPhos, 41.0 mg, 10 mol %),  $\text{Pd}_2(\text{dba})_3$  (45.8 mg, 5 mol %), (4-(trifluoromethyl)phenyl)boronic acid (4.0 mmol, 4.0 equiv) and  $\text{K}_3\text{PO}_4$  (1.06 g, 5.0 mmol, 5.0 equiv). The tube was sealed with a teflon-coated screw cap and then evacuated and backfilled with argon (three times). Dry toluene (2.0 mL) was added *via* syringe through the septum. The reaction mixture was vigorously stirred at 110 °C until the carbazole was completely consumed, as judged by TLC analysis (48 hours). The reaction mixture was then diluted with ethyl acetate (10 mL), filtered through a thin pad of silica gel (eluting with ethyl acetate) and concentrated under reduced pressure. The crude material was purified by flash chromatography on silica gel (hexane/toluene: gradient from 100:0 to 2:1), to give a pink solid. After recrystallization using ethyl acetate, the desired product was obtained as a white solid (284 mg, 50% yield).

$^1\text{H NMR}$  (400 MHz,  $\text{CDCl}_3$ ):  $\delta$  8.01 (s, 1H), 7.69-7.54 (m, 6H), 7.51-7.40 (m, 6H), 1.28 (s, 18H).

$^{13}\text{C NMR}$  (101 MHz,  $\text{CDCl}_3$ ):  $\delta$  150.1, 146.3, 140.2, 133.0, 131.4, 128.9 (q,  $J = 32.3$  Hz), 124.6 (q,  $J = 273.0$  Hz), 124.1 (q,  $J = 3.8$  Hz), 123.8, 120.1, 108.6, 37.1, 33.03.

$^{19}\text{F NMR}$  (376 MHz,  $\text{CDCl}_3$ ):  $\delta$  -62.34.

**HRMS**: Calculated for  $\text{C}_{34}\text{H}_{30}\text{F}_6\text{N}$  ( $\text{M-H}^+$ ): 566.2288, found: 566.2305.

## Synthesis of catalyst **3e**

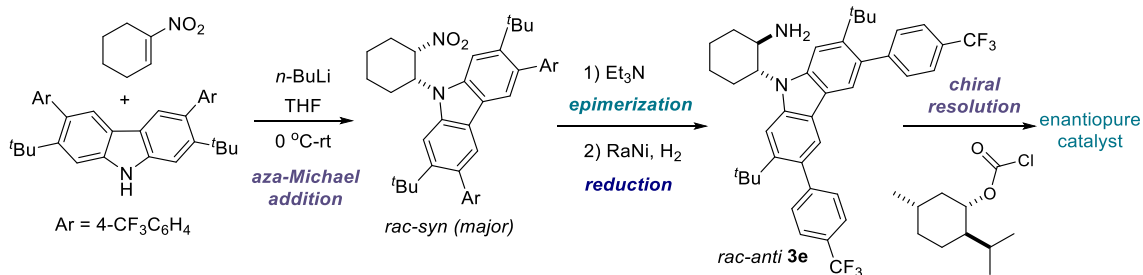

### Procedure for the aza-Michael addition.

To an oven dried, argon purged 2-neck round bottomed flask fitted with an argon inlet and septum was added the substituted carbazole (1 equiv) and anhydrous THF (0.05 M). The reaction mixture was cooled to 0 °C and *n*-BuLi (1.05 equiv) was added dropwise. The reaction was stirred at 0 °C for 30 minutes, and then 1-nitrocyclohex-1-ene (1.2 equiv) was added to the cold solution. The solution was allowed to slowly reach ambient temperature and stirred until full consumption of the carbazole, as inferred by TLC analysis (hexane/ethyl acetate 20:1). The reaction was then quenched with saturated aqueous NH<sub>4</sub>Cl solution and extracted with EtOAc. The organic phase was washed with water and brine, dried over MgSO<sub>4</sub> and concentrated. The crude material (*syn/anti* = 5:1) was continued to the next step without further purification.

### Procedure for the epimerization from *syn* to *anti*.

To the crude nitroalkane (1 equiv) in a round bottomed flask was added THF (0.1 M) and triethylamine (2 equiv). The reaction mixture was heated to 60 °C until epimerization was complete, as determined by <sup>1</sup>H NMR analysis of the epimeric protons (usually two days were necessary). The reaction mixture was then concentrated to dryness. The crude material was continued to the next step.

### Procedure for the reduction of the nitroalkane.

To the crude *anti* nitroalkane (1 equiv), suspended in a solution of EtOAc/*i*-PrOH (1:3) in a Parr hydrogenation flask, was added Raney nickel (commercial slurry in water, 2 tsps per mmol of nitroalkane). The flask was then charged with a hydrogen atmosphere (3-3.5 bar) and shook for 24 hours. The reaction mixture was filtered through celite and rinsed with ethyl acetate (**CAUTION**: Raney nickel oxidizes exothermically, the filter cake must not be allowed to become dry) and concentrated. The residue was purified by flash chromatography (2% MeOH in DCM) to obtain the racemic aminocatalyst **3e** as a white-yellow solid (average 60% yield over 3 steps).

### Procedure for the resolution of the racemic catalyst.

To an oven dried, argon purged, round-bottomed flask was added *rac-3e* (1.37 mmol, 1 equiv) and anhydrous tetrahydrofuran (5 mL). The solution was cooled to 0 °C and anhydrous pyridine (154 μL, 1.92 mmol, 1.4 equiv) was added followed by dropwise addition of (1*R*)-(-)-menthyl chloroformate (0.35 mL, 1.64 mmol). The reaction was then stirred overnight at ambient temperature. The reaction was diluted with CH<sub>2</sub>Cl<sub>2</sub> and washed with 2 M HCl solution, water and then brine. The organic phase was then dried over MgSO<sub>4</sub>, and concentrated to an off-white solid. The residue containing both menthyl carbamates of (*S,S*)-**3e** and (*R,R*)-**3e** was separated by flash chromatography (hexane:DCM 1:1) to afford both of the enantiopure menthyl carbamates of (*R,R*)-**3e** (first fraction, 492 mg) and (*S,S*)-**3e** (second fraction, 413 mg).

### Procedure for the hydrolysis of enantiopure (-)-menthyl carbamate to give (*R,R*)-**3e**.

To an argon purged Teflon vial was added the enantiopure (-)-menthyl carbamate (413 mg, 1 equiv), and 4 mL TBAF solution (1.0 M in THF). The reaction mixture was heated at 130 °C for two days, and then cooled to ambient temperature. Flash chromatography (dichloro methylene/ethyl acetate: from 100:0 to 0:100, repeated twice) afforded the enantiopure catalyst (*R,R*)-**3e** as a white solid (266.6 mg, 85% yield).

**<sup>1</sup>H NMR** (400 MHz, CDCl<sub>3</sub>): δ 7.80 (s, 1H), 7.64-7.50 (m, 7H), 7.47 (d, *J* = 7.9 Hz, 4H), 4.28-4.15 (m, 1H), 3.81 (td, *J* = 10.4, 4.1 Hz, 1H), 2.50-2.36 (m, 1H), 2.31-2.21 (m, 1H), 2.10-1.93 (m, 3H), 1.68-1.40 (m, 4H), 1.31 (s, 18H).

**<sup>13</sup>C NMR** (126 MHz, CDCl<sub>3</sub>): δ 150.1, 150.0, 146.1, 145.4, 142.1, 139.3, 132.6, 132.5, 131.5, 131.4, 129.6, 128.8 (q, *J* = 32.4 Hz), 124.5 (q, *J* = 272.0 Hz), 124.1, 123.9, 123.7, 120.7, 119.5, 109.5, 106.7, 63.3, 52.5, 37.3, 37.2, 35.6, 33.1, 32.0, 29.8, 26.4, 25.6.

**<sup>19</sup>F NMR** (376 MHz, CDCl<sub>3</sub>): δ -62.35.

**HPLC:** The enantiomeric excess of the catalyst, was determined to be >99% by HPLC analysis on a Daicel Chiralpak IC-3 column: 97/3 hexane/isopropanol, flow rate 0.8 mL/min, λ = 254 nm: τ<sub>Major</sub> = 5.91 min, τ<sub>Minor</sub> = 6.32 min. [α]<sub>D</sub><sup>25</sup> = +13.1 (c = 0.20, CHCl<sub>3</sub>)

**HRMS:** Calculated for C<sub>40</sub>H<sub>43</sub>F<sub>6</sub>N<sub>2</sub> (M+H<sup>+</sup>): 665.3325, found: 665.3343.

## Synthesis of the Organic Silane Substrates

### General procedure for the synthesis of carbazole or aniline derived organic silanes **4** or **9**

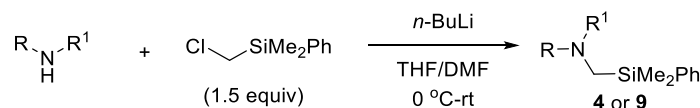

To a stirred solution of the opportune carbazole or aniline substrate (10 mmol), dissolved in 5 mL of anhydrous THF, was added anhydrous DMF (or HMPA for aniline substrate, 5 mL). After cooling to -78 °C, *n*-BuLi (2.5 M in hexane, 1.0 equiv) was added slowly, and the reaction mixture was allowed to reach ambient temperature. After cooling again to -78 °C degree, 1.5 equiv of ClCH<sub>2</sub>SiMe<sub>2</sub>Ph were added. The reaction mixture was warmed to ambient temperature and stirring continued overnight. After consumption of the carbazole or aniline substrate, as inferred by GC-MS or TLC analysis, the reaction mixture was quenched by adding EtOAc and washed with H<sub>2</sub>O three times. The organic phase were washed with brine, dried over Mg<sub>2</sub>SO<sub>4</sub>, filtered and concentrated. The crude mixture was purified by silica gel (for aniline derived silane **9**, neutral silica gel was used) column chromatography to afford the desired products.

### Characterization of α-carbazole silyl substrates **4**

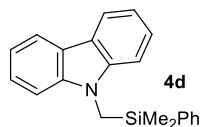

#### **9-((dimethyl(phenyl)silyl)methyl)-9H-carbazole **4d****

Following the procedure described above, using 9H-carbazole (1.67 g, 10.0 mmol), (chloromethyl)dimethyl(phenyl)silane (2.7 mL), and *n*-BuLi (10.0 mmol), silane **4d** (2.82 g, 8.93 mmol, 89%) was obtained as a white solid after column chromatography (from hexane (100%) to hexane/Et<sub>2</sub>O (50:1)).

**<sup>1</sup>H NMR** (500 MHz, CDCl<sub>3</sub>): δ 8.11 (d, *J* = 10.0 Hz, 2H), 7.57-7.49 (m, 2H), 7.45-7.33 (m, 5H), 7.29-7.15 (m, 4H), 4.05 (s, 2H), 0.31 (s, 6H).

**<sup>13</sup>C NMR** (126 MHz, CDCl<sub>3</sub>): δ 140.8, 137.2, 133.8, 129.8, 128.2, 125.4, 122.7, 120.3, 118.5, 109.1, 34.3, -2.9. **HRMS:** Calculated for C<sub>21</sub>H<sub>21</sub>NNaSi (M+Na<sup>+</sup>): 338.1335, found 338.1348.

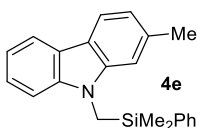

#### **9-((dimethyl(phenyl)silyl)methyl)-2-methyl-9H-carbazole **4e****

Following the procedure described above, using 2-Me-9H-carbazole (362 mg, 2.0 mmol), (chloromethyl)dimethyl(phenyl)silane (541 μL), and *n*-BuLi (2.0 mmol), silane **4e** (496 mg, 1.50 mmol, 75%) was obtained as a light yellow oil after column chromatography (from hexane (100%) to hexane/Et<sub>2</sub>O (50:1)).

**<sup>1</sup>H NMR** (400 MHz, CDCl<sub>3</sub>): δ 8.04 (d, *J* = 7.7 Hz, 1H), 7.95 (d, *J* = 7.9 Hz, 1H), 7.56-7.49 (m, 2H), 7.44-7.32 (m, 4H), 7.22-7.13 (m, 2H), 7.00 (d, *J* = 7.9 Hz, 1H), 6.92 (s, 1H), 4.00 (s, 2H), 2.47 (s, 3H), 0.30 (s, 6H). **<sup>13</sup>C NMR** (101 MHz, CDCl<sub>3</sub>): δ 141.3, 140.9, 137.4, 135.5, 133.8, 129.8, 128.2, 124.9, 122.8, 120.4, 120.0, 119.9, 119.9, 118.3, 109.4, 108.9, 34.2, 22.4, -3.0.

**HRMS:** Calculated for C<sub>22</sub>H<sub>24</sub>NSi (M+H<sup>+</sup>): 330.1673, found 330.1663.

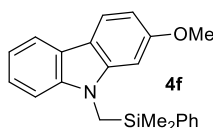

#### 9-((dimethyl(phenyl)silyl)methyl)-2-methoxy-9H-carbazole **4f**

Following the procedure described above, using 2-Me-9H-carbazole (395 mg, 2.0 mmol), (chloromethyl)dimethyl(phenyl)silane (541  $\mu$ L), and *n*-BuLi (2.0 mmol), silane **4f** (555 mg, 1.60 mmol, 80%) was obtained as a white solid after column chromatography (from hexane (100%) to hexane/Et<sub>2</sub>O (50:1)).

**<sup>1</sup>H NMR** (500 MHz, CDCl<sub>3</sub>):  $\delta$  7.99 (ddd, *J* = 7.7, 1.3, 0.7 Hz, 1H), 7.93 (dd, *J* = 8.4, 0.5 Hz, 1H), 7.55-7.48 (m, 2H), 7.42-7.30 (m, 4H), 7.22-7.13 (m, 2H), 6.79 (dd, *J* = 8.5, 2.2 Hz, 1H), 6.59 (d, *J* = 2.2 Hz, 1H), 3.98 (s, 2H), 3.78 (s, 3H), 0.31 (s, 6H).

**<sup>13</sup>C NMR** (126 MHz, CDCl<sub>3</sub>):  $\delta$  158.9, 142.1, 141.0, 137.4, 133.8, 129.8, 128.2, 124.2, 122.9, 121.0, 119.4, 118.6, 116.6, 108.8, 107.3, 93.3, 55.6, 34.3, -3.0.

**HRMS**: Calculated for C<sub>22</sub>H<sub>24</sub>NOSi (M+H<sup>+</sup>): 346.1622, found 346.1635.

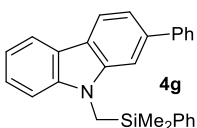

#### 9-((dimethyl(phenyl)silyl)methyl)-2-phenyl-9H-carbazole **4g**

Following the procedure described above, using 2-phenyl-9H-carbazole (972 mg, 4.0 mmol), (chloromethyl)dimethyl(phenyl)silane (1.6 mL), and *n*-BuLi (4.0 mmol), silane **4g** (1.27 g, 3.24 mmol, 81%) was obtained as a white solid after column chromatography (from hexane (100%) to hexane/Et<sub>2</sub>O (50:1)).

**<sup>1</sup>H NMR** (400 MHz, CDCl<sub>3</sub>):  $\delta$  8.18-8.05 (m, 2H), 7.59-7.50 (m, 4H), 7.48-7.30 (m, 9H), 7.26-7.16 (m, 2H), 4.08 (s, 2H), 0.34 (s, 6H).

**<sup>13</sup>C NMR** (101 MHz, CDCl<sub>3</sub>):  $\delta$  142.4, 141.4, 141.3, 138.9, 137.2, 133.8, 129.8, 128.8, 128.3, 127.7, 127.0, 125.5, 122.5, 122.0, 120.4, 120.3, 118.7, 118.2, 109.1, 107.9, 34.4, -3.0.

**HRMS**: Calculated for C<sub>27</sub>H<sub>25</sub>NSiNa (M+Na<sup>+</sup>): 414.1648, found 414.1644.

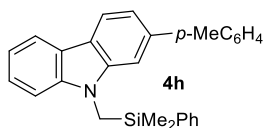

#### 2-(4-methylphenyl)-9-((dimethyl(phenyl)silyl)methyl)-9H-carbazole **4h**

Following the procedure described above, using 2-(4-methylphenyl)-9H-carbazole (772 mg, 3.0 mmol), (chloromethyl)dimethyl(phenyl)silane (810  $\mu$ L), and *n*-BuLi (3.0 mmol), silane **4h** (866 mg, 2.75 mmol, 92%) was obtained as a white solid after column chromatography (from hexane (100%) to hexane/Et<sub>2</sub>O (50:1)).

**<sup>1</sup>H NMR** (500 MHz, CDCl<sub>3</sub>):  $\delta$  8.12-8.08 (m, 2H), 7.55-7.50 (m, 2H), 7.48-7.43 (m, 2H), 7.43-7.33 (m, 5H), 7.33-7.30 (m, 1H), 7.28-7.24 (m, 3H), 7.22-7.18 (m, 1H), 4.07 (s, 2H), 2.43 (s, 3H), 0.33 (s, 6H).

**<sup>13</sup>C NMR** (126 MHz, CDCl<sub>3</sub>):  $\delta$  141.3, 139.5, 138.9, 137.3, 136.8, 133.8, 129.8, 129.5, 128.3, 127.5, 125.4, 122.6, 121.7, 120.4, 120.3, 118.6, 118.1, 109.1, 107.6, 34.3, 21.3, -2.9.

**HRMS**: Calculated for C<sub>28</sub>H<sub>27</sub>NNaSi (M+Na<sup>+</sup>): 428.1805, found 428.1807.

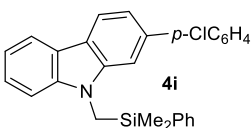

#### 2-(4-chlorophenyl)-9-((dimethyl(phenyl)silyl)methyl)-9H-carbazole **4i**

Following the procedure described above, using 2-(4-chlorophenyl)-9H-carbazole (833 mg, 3.0 mmol), (chloromethyl)dimethyl(phenyl)silane (810  $\mu$ L), and *n*-BuLi (3.0 mmol), silane **4i** (1.0 g, 2.35 mmol, 78%) was obtained as a light yellow oil after column chromatography (from hexane (100%) to hexane/Et<sub>2</sub>O (50:1)).

**<sup>1</sup>H NMR** (400 MHz, CDCl<sub>3</sub>):  $\delta$  8.14-8.06 (m, 2H), 7.54-7.48 (m, 2H), 7.46-7.30 (m, 9H), 7.30-7.13 (m, 3H), 4.08 (s, 2H), 0.33 (s, 6H).

**<sup>13</sup>C NMR** (126 MHz, CDCl<sub>3</sub>):  $\delta$  141.4, 141.2, 140.8, 137.5, 137.3, 133.9, 133.1, 129.8, 128.9, 128.9, 128.3, 125.7, 122.4, 122.2, 120.5, 120.4, 118.8, 117.9, 109.1, 107.8, 34.4, -3.0.

**HRMS**: Calculated for C<sub>27</sub>H<sub>24</sub>NCINaSi (M+Na<sup>+</sup>): 448.1259, found 448.1261.

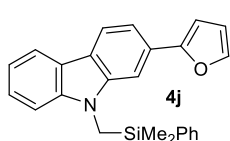

#### 9-((dimethyl(phenyl)silyl)methyl)-2-(furan-2-yl)-9H-carbazole **4j**

Following the procedure described above, using 2-(thiophen-2-yl)-9H-carbazole (465 mg, 2.0 mmol), (chloromethyl)dimethyl(phenyl)silane (540  $\mu$ L), and *n*-BuLi (2.0 mmol), silane **4j** (404 mg, 1.32 mmol, 53%) was obtained as a yellow oil after column chromatography (from hexane (100%) to hexane/toluene (20:1)).

$^1\text{H NMR}$  (400 MHz,  $\text{CDCl}_3$ )  $\delta$  8.06 (dd,  $J = 8.1, 0.7$  Hz, 2H), 7.56-7.46 (m, 5H), 7.42- 7.31 (m, 4H), 7.23-7.13 (m, 2H), 6.64 (dd,  $J = 3.3, 0.8$  Hz, 1H), 6.51 (dd,  $J = 3.4, 1.8$  Hz, 1H), 4.07 (s, 2H), 0.32 (s, 6H).

$^{13}\text{C NMR}$  (101 MHz,  $\text{CDCl}_3$ ):  $\delta$  155.2, 141.9, 141.4, 141.1, 137.2, 133.8, 129.8, 128.4, 128.2, 125.5, 122.6, 122.0, 120.5, 120.2, 118.7, 115.1, 111.9, 109.1, 104.8, 104.5, 34.4, -3.0.

**HRMS:** Calculated for  $\text{C}_{25}\text{H}_{24}\text{NOSi}$  ( $\text{M}+\text{H}^+$ ): 382.1622, found 382.1621.

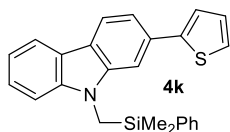

#### 9-((dimethyl(phenyl)silyl)methyl)-2-(thiophen-2-yl)-9H-carbazole **4k**

Following the procedure described above, using 2-(thiophen-2-yl)-9H-carbazole (750 mg, 3.0 mmol), (chloromethyl)dimethyl(phenyl)silane (810  $\mu\text{L}$ ), and *n*-BuLi (3.0 mmol), silane **4k** (526 mg, 1.32 mmol, 44%) was obtained as a green oil after column chromatography (from hexane (100%) to hexane/ $\text{Et}_2\text{O}$  (50:1)).

$^1\text{H NMR}$  (400 MHz,  $\text{CDCl}_3$ ):  $\delta$  8.10-8.01 (m, 2H), 7.54-7.50 (m, 2H), 7.46 (dd,  $J = 8.1, 1.5$  Hz, 1H), 7.42-7.32 (m, 5H), 7.30-7.26 (m, 2H), 7.25-7.15 (m, 2H), 7.10 (dd,  $J = 5.1, 3.6$  Hz, 1H), 4.06 (s, 2H), 0.33 (s, 6H).

$^{13}\text{C NMR}$  (126 MHz,  $\text{CDCl}_3$ ):  $\delta$  145.9, 141.5, 141.2, 137.1, 133.8, 131.9, 129.9, 128.3, 128.1, 125.6, 124.5, 123.0, 122.5, 122.2, 120.6, 120.3, 118.8, 117.3, 109.1, 106.6, 34.4, -3.0.

**HRMS:** Calculated for  $\text{C}_{25}\text{H}_{24}\text{NSSi}$  ( $\text{M}+\text{H}^+$ ): 398.1393, found 398.1400.

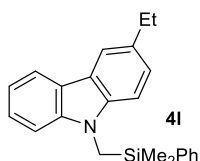

#### 9-((dimethyl(phenyl)silyl)methyl)-3-ethyl-9H-carbazole **4l**

Following the procedure described above, using 3-Et-9H-carbazole (390 mg, 2.0 mmol), (chloromethyl)dimethyl(phenyl)silane (541  $\mu\text{L}$ ), and *n*-BuLi (2.0 mmol), silane **4l** (354 mg, 1.03 mmol, 51%) was obtained as a light yellow oil after column chromatography (from hexane (100%) to hexane/ $\text{Et}_2\text{O}$  (50:1)).

$^1\text{H NMR}$  (400 MHz,  $\text{CDCl}_3$ ):  $\delta$  8.07 (d,  $J = 7.7$  Hz, 1H), 7.91 (d,  $J = 0.9$  Hz, 1H), 7.55-7.51 (m, 2H), 7.44-7.32 (m, 4H), 7.25 (d,  $J = 10.7$  Hz, 1H), 7.21-7.12 (m, 3H), 4.01 (s, 2H), 2.84 (q,  $J = 7.6$  Hz, 2H), 1.35 (t,  $J = 7.6$  Hz, 3H), 0.29 (s, 6H).

$^{13}\text{C NMR}$  (101 MHz,  $\text{CDCl}_3$ ):  $\delta$  141.1, 139.4, 137.3, 134.5, 133.8, 129.8, 128.2, 125.8, 125.2, 122.8, 122.6, 120.2, 119.0, 118.2, 109.0, 108.9, 34.3, 29.1, 16.6, -2.9.

**HRMS:** Calculated for  $\text{C}_{23}\text{H}_{26}\text{NSi}$  ( $\text{M}+\text{H}^+$ ): 344.1829, found 344.1823.

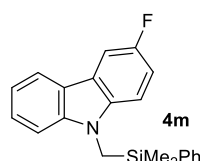

#### 9-((dimethyl(phenyl)silyl)methyl)-3-fluoro-9H-carbazole **4m**

Following the procedure described above, using 3-fluoro-9H-carbazole (463 mg, 2.5 mmol), (chloromethyl)dimethyl(phenyl)silane (540  $\mu\text{L}$ ), and *n*-BuLi (2.5 mmol), silane **4m** (454 mg, 1.36 mmol, 54%) was obtained as a white solid after column chromatography (from hexane (100%) to hexane/ $\text{Et}_2\text{O}$  (50:1)).

$^1\text{H NMR}$  (400 MHz,  $\text{CDCl}_3$ ):  $\delta$  8.03 (ddd,  $J = 7.8, 1.2, 0.7$  Hz, 1H), 7.73 (ddd,  $J = 8.9, 2.4, 0.7$  Hz, 1H), 7.50-7.44 (m, 2H), 7.43-7.30 (m, 4H), 7.24-7.14 (m, 2H), 7.15-7.03 (m, 2H), 4.01 (s, 2H), 0.29 (s, 6H).

$^{19}\text{F NMR}$  (376 MHz,  $\text{CDCl}_3$ ):  $\delta$  -125.7.

$^{13}\text{C NMR}$  (101 MHz,  $\text{CDCl}_3$ ):  $\delta$  157.1 (d,  $J = 235.3$  Hz), 141.60, 137.1 (d,  $J = 25.2$  Hz), 133.76, 129.87, 128.24, 126.02, 122.9 (d,  $J = 10.1$  Hz), 122.2 (d,  $J = 4.0$  Hz), 120.5, 118.4, 113.1 (d,  $J = 26.3$  Hz), 109.5 (d,  $J = 9.1$  Hz), 109.4, 106.0, 105.8, 34.5, -3.0.

**HRMS:** Calculated for  $\text{C}_{21}\text{H}_{20}\text{FNNaSi}$  ( $\text{M}+\text{Na}^+$ ): 356.1241, found 356.1235.

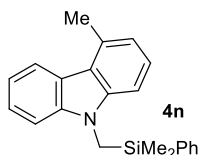

#### 9-((dimethyl(phenyl)silyl)methyl)-4-methyl-9H-carbazole **4n**

Following the procedure described above, using 4-Me-9H-carbazole (318 mg, 1.75 mmol), (chloromethyl)dimethyl(phenyl)silane (473  $\mu\text{L}$ ), and *n*-BuLi (1.75 mmol), silane **4n** (492 mg, 1.49 mmol, 85%) was obtained as a light yellow oil after column chromatography (from hexane (100%) to hexane/ $\text{Et}_2\text{O}$  (50:1)).

$^1\text{H NMR}$  (500 MHz,  $\text{CDCl}_3$ ):  $\delta$  8.24-8.16 (m, 1H), 7.57-7.50 (m, 2H), 7.44-7.34 (m, 4H), 7.30 (dd,  $J = 8.2$ , 7.2 Hz, 1H), 7.25-7.18 (m, 2H), 7.13-7.07 (m, 1H), 6.98 (dt,  $J = 7.2$ , 0.9 Hz, 1H), 4.04 (s, 2H), 2.90 (s, 3H), 0.28 (s, 6H).

$^{13}\text{C NMR}$  (126 MHz,  $\text{CDCl}_3$ ):  $\delta$  140.9, 140.8, 137.3, 133.8, 133.4, 129.8, 128.2, 125.2, 124.8, 123.3, 122.6, 121.2, 120.2, 118.4, 108.9, 106.8, 34.2, 21.0, -2.9.

**HRMS:** Calculated for  $\text{C}_{22}\text{H}_{24}\text{NSi}$  ( $\text{M}+\text{H}^+$ ): 330.1673, found 330.1682.

### Characterization of $\alpha$ -aniline silyl substrates **9**

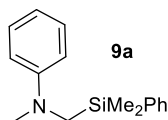

#### ***N*-((dimethyl(phenyl)silyl)methyl)-*N*-methylaniline **9a****

Following the procedure described above, using (chloromethyl)dimethyl(phenyl)silane (1.35 mL), *N*-methylaniline (535 mg, 5.0 mmol), and *n*-BuLi (5.0 mmol), silane **9a** (562 mg, 2.20 mmol, 44%) was obtained as a colorless oil after column chromatography (from hexane (100%) to hexane/toluene (10:1)).

$^1\text{H NMR}$  (500 MHz,  $\text{CDCl}_3$ ):  $\delta$  7.58-7.52 (m, 2H), 7.42-7.33 (m, 3H), 7.23-7.14 (m, 2H), 6.68-6.60 (m, 3H), 3.07 (s, 2H), 2.82 (s, 3H), 0.37 (s, 6H).

$^{13}\text{C NMR}$  (126 MHz,  $\text{CDCl}_3$ ):  $\delta$  150.7, 138.5, 133.8, 129.4, 129.1, 128.1, 115.5, 112.2, 43.8, 40.4, -2.6.

**HRMS:** Calculated for  $\text{C}_{16}\text{H}_{22}\text{NSi}$  ( $\text{M}+\text{H}^+$ ): 256.1516, found 256.1507.

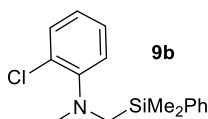

#### **2-Chloro-*N*-((dimethyl(phenyl)silyl)methyl)-*N*-methylaniline **9b****

Following the procedure described above, using (chloromethyl)dimethyl(phenyl)silane (1.35 mL), 2-chloro-*N*-methylaniline (708 mg, 5.0 mmol), and *n*-BuLi (5.0 mmol), silane **9b** (753 mg, 2.6 mmol, 52%) was obtained as a colorless oil after column chromatography (from hexane (100%) to hexane/toluene (10:1)).

$^1\text{H NMR}$  (500 MHz,  $\text{CDCl}_3$ ):  $\delta$  7.58-7.53 (m, 2H), 7.37-7.29 (m, 4H), 7.16-7.07 (m, 2H), 6.94-6.88 (m, 1H), 2.85 (s, 2H), 2.70 (s, 3H), 0.34 (s, 6H).

$^{13}\text{C NMR}$  (126 MHz,  $\text{CDCl}_3$ ):  $\delta$  152.3, 138.9, 133.8, 130.6, 129.3, 129.2, 127.9, 127.3, 123.4, 121.7, 47.3, 45.3, -2.8.

**HRMS:** Calculated for  $\text{C}_{16}\text{H}_{21}\text{ClNSi}$  ( $\text{M}+\text{H}^+$ ): 290.1126, found 290.1123.

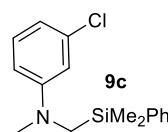

#### **3-chloro-*N*-((dimethyl(phenyl)silyl)methyl)-*N*-methylaniline **9c****

Following the procedure described above, using (chloromethyl)dimethyl(phenyl)silane (1.35 mL), 3-chloro-*N*-methylaniline (708 mg, 5 mmol), and *n*-BuLi (5.0 mmol), silane **9c** (757 mg, 2.62 mmol, 52%) was obtained as a yellow oil after column chromatography (from hexane (100%) to hexane/toluene (10:1)).

$^1\text{H NMR}$  (500 MHz,  $\text{CDCl}_3$ ):  $\delta$  7.55-7.49 (m, 2H), 7.42-7.33 (m, 3H), 7.09-7.02 (m, 1H), 6.60-6.55 (m, 2H), 6.51-6.44 (m, 1H), 3.05 (s, 2H), 2.81 (s, 3H), 0.37 (s, 6H).

$^{13}\text{C NMR}$  (126 MHz,  $\text{CDCl}_3$ ):  $\delta$  151.4, 138.0, 135.0, 133.8, 129.9, 129.5, 128.1, 115.1, 111.7, 110.1, 43.8, 40.3, -2.7.

**HRMS:** Calculated for  $\text{C}_{16}\text{H}_{21}\text{ClNSi}$  ( $\text{M}+\text{H}^+$ ): 290.1126, found 290.1131.

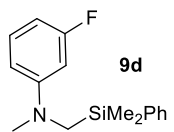

#### ***N*-((dimethyl(phenyl)silyl)methyl)-3-fluoro-*N*-methylaniline **9d****

Following the procedure described above, using (chloromethyl)dimethyl(phenyl)silane (2.7 mL), 3-fluoro-*N*-methylaniline (1.25 g, 10.0 mmol), and *n*-BuLi (10.0 mmol), silane **9d** (1.32 g, 4.80 mmol, 48%) was obtained as a yellow oil after column chromatography (from hexane (100%) to hexane/toluene (10:1)).

$^1\text{H NMR}$  (500 MHz,  $\text{CDCl}_3$ ):  $\delta$  7.57-7.50 (m, 2H), 7.44-7.34 (m, 3H), 7.14-7.03 (m, 1H), 6.41-6.35 (m, 1H), 6.35-6.24 (m, 2H), 3.06 (s, 2H), 2.81 (s, 3H), 0.37 (s, 6H).

$^{13}\text{C NMR}$  (126 MHz,  $\text{CDCl}_3$ ):  $\delta$  164.3 (d,  $J = 241.2$  Hz), 152.1 (d,  $J = 10.7$  Hz), 138.1, 133.8, 130.0 (d,  $J = 10.6$  Hz), 129.5, 128.1, 107.6 (d,  $J = 1.9$  Hz), 101.7 (d,  $J = 21.7$  Hz), 98.8 (d,  $J = 26.1$  Hz), 43.8, 40.3, -2.7.

$^{19}\text{F NMR}$  (376 MHz,  $\text{CDCl}_3$ ):  $\delta$  -113.13.

**HRMS:** Calculated for C<sub>16</sub>H<sub>21</sub>FNSi (M+H<sup>+</sup>): 274.1422, found 274.1427.

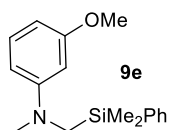

**N-((dimethyl(phenyl)silyl)methyl)-3-methoxy-N-methylaniline 9e**

Following the procedure described above, using (chloromethyl)dimethyl(phenyl)silane (1.35 mL), 3-methoxy-*N*-methylaniline (686 mg, 5.0 mmol), and *n*-BuLi (5.0 mmol), silane **9e** (695 mg, 2.4 mmol, 48%) was obtained as a colorless oil after column chromatography (from hexane (100%) to hexane/toluene (10:1)).

**<sup>1</sup>H NMR** (500 MHz, CDCl<sub>3</sub>): δ 7.60-7.51 (m, 2H), 7.43-7.31 (m, 3H), 7.10 (t, *J* = 8.3 Hz, 1H), 6.26 (ddd, *J* = 29.1, 8.1, 2.3 Hz, 2H), 6.19 (s, 1H), 3.76 (s, 3H), 3.07 (s, 2H), 2.82 (s, 3H), 0.37 (s, 6H).

**<sup>13</sup>C NMR** (126 MHz, CDCl<sub>3</sub>): δ 160.8, 152.0, 138.4, 133.8, 129.7, 129.4, 128.1, 105.4, 100.5, 98.5, 55.2, 43.9, 40.4, -2.6.

**HRMS:** Calculated for C<sub>17</sub>H<sub>24</sub>NOSi (M+H<sup>+</sup>): 286.1622, found 286.1626.

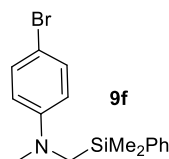

**4-Bromo-N-((dimethyl(phenyl)silyl)methyl)-N-methylaniline 9f**

Following the procedure described above, using (chloromethyl)dimethyl(phenyl)silane (1.35 mL), 4-bromo-*N*-methylaniline (925 mg, 5.0 mmol), and *n*-BuLi (5.0 mmol), silane **9f** (853 mg, 2.55 mmol, 51%) was obtained as a yellow oil after column chromatography (from hexane (100%) to hexane/toluene (10:1)).

**<sup>1</sup>H NMR** (500 MHz, CDCl<sub>3</sub>): δ 7.55-7.48 (m, 2H), 7.41-7.33 (m, 3H), 7.25-7.18 (m, 2H), 6.48 (d, *J* = 8.8 Hz, 2H), 3.03 (s, 2H), 2.79 (s, 3H), 0.35 (s, 6H).

**<sup>13</sup>C NMR** (126 MHz, CDCl<sub>3</sub>): δ 149.4, 138.1, 133.7, 131.6, 129.5, 128.1, 113.6, 107.2, 43.9, 40.4, -2.6.

**HRMS:** Calculated for C<sub>16</sub>H<sub>21</sub>BrNSi (M+H<sup>+</sup>): 334.0621, found 334.0618.

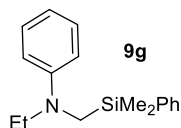

**N-((dimethyl(phenyl)silyl)methyl)-N-ethylaniline 9g**

Following the procedure described above, using (chloromethyl)dimethyl(phenyl)silane (1.35 mL), *N*-ethylaniline (606 mg, 5.0 mmol), and *n*-BuLi (5.0 mmol), silane **9g** (595 mg, 2.21 mmol, 44%) was obtained as a colorless oil after column chromatography (from hexane (100%) to hexane/toluene (10:1)).

**<sup>1</sup>H NMR** (500 MHz, CDCl<sub>3</sub>): δ 7.58-7.53 (m, 2H), 7.41-7.35 (m, 3H), 7.24-7.10 (m, 2H), 6.69-6.57 (m, 3H), 3.27 (q, *J* = 7.0 Hz, 2H), 3.02 (s, 2H), 1.03 (t, *J* = 7.0 Hz, 3H), 0.37 (s, 6H).

**<sup>13</sup>C NMR** (126 MHz, CDCl<sub>3</sub>): δ 149.1, 138.6, 133.8, 129.3, 129.1, 128.1, 115.1, 112.3, 46.5, 40.8, 10.7, -2.6.

**HRMS:** Calculated for C<sub>17</sub>H<sub>24</sub>NSi (M+H<sup>+</sup>): 270.1673, found 270.1668.

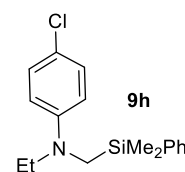

**4-Chloro-N-((dimethyl(phenyl)silyl)methyl)-N-ethylaniline 9h**

Following the procedure described above, using (chloromethyl)dimethyl(phenyl)silane (1.35 mL), 4-chloro-*N*-ethylaniline (1.56 g, 5.0 mmol), and *n*-BuLi (5.0 mmol), silane **9h** (589 mg, 1.94 mmol, 38%) was obtained as a colorless oil after column chromatography (from hexane (100%) to hexane/toluene (10:1)).

**<sup>1</sup>H NMR** (400 MHz, CDCl<sub>3</sub>): δ 7.55-7.47 (m, 2H), 7.41-7.32 (m, 3H), 7.12-7.01 (m, 2H), 6.57-6.43 (m, 2H), 3.22 (q, *J* = 7.0 Hz, 2H), 2.97 (s, 2H), 1.00 (t, *J* = 7.0 Hz, 3H), 0.34 (s, 6H).

**<sup>13</sup>C NMR** (101 MHz, CDCl<sub>3</sub>): δ 147.6, 138.3, 133.7, 129.5, 128.8, 128.1, 119.8, 113.4, 46.7, 41.1, 10.6, -2.7.

**HRMS:** Calculated for C<sub>17</sub>H<sub>23</sub>ClNSi (M+H<sup>+</sup>): 304.1283, found 304.1284.

## Supplementary Note 2

### Synthesis of Iminium Ion A-2

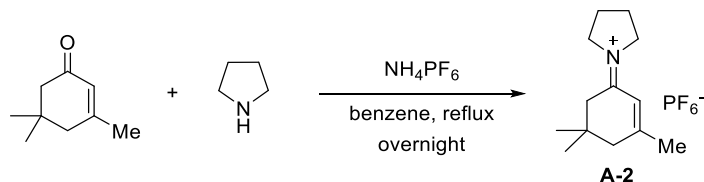

To a solution of isophorone (20.0 mmol, 1.0 equiv) and pyrrolidine (20.0 mmol, 1.0 equiv) in 25 mL benzene were added ammonium hexafluorophosphate (20.0 mmol, 1.0 equiv).<sup>3</sup> The suspension was refluxed overnight with continuous removal of the formed water (using a *Dean-Stark* apparatus). Then, the solvent was evaporated under reduced pressure to afford a yellow crude solid. After washing it with dry diethyl ether and acetonitrile, the iminium ion **A-2** (3.56 g, 53%) were obtained as a white solid.

<sup>1</sup>H NMR (400 MHz, CDCl<sub>3</sub>): δ 6.42 (d, *J* = 1.4 Hz, 1H), 3.99-3.81 (m, 4H), 2.63 (s, 2H), 2.34 (s, 2H), 2.24-2.12 (m, 7H), 1.09 (s, 6H).

<sup>13</sup>C NMR (75 MHz, CDCl<sub>3</sub>): δ 173.2, 172.4, 117.1, 53.0, 52.7, 45.4, 42.7, 32.7, 28.1, 26.6, 24.4, 24.4.

<sup>19</sup>F NMR (376 MHz, CDCl<sub>3</sub>): δ -73.6 (d, *J* = 712.6 Hz).

<sup>31</sup>P NMR (162 MHz, CDCl<sub>3</sub>): δ -141.51 (sept, *J* = 711.2 Hz).

HRMS: Calculated for C<sub>13</sub>H<sub>22</sub>N (M-PF<sub>6</sub><sup>-</sup>): 192.1747, found 192.1738.

## Supplementary Note 3

### Mechanism studies

#### Radical Trapping Experiment with Ethene-1,1-diyldibenzene

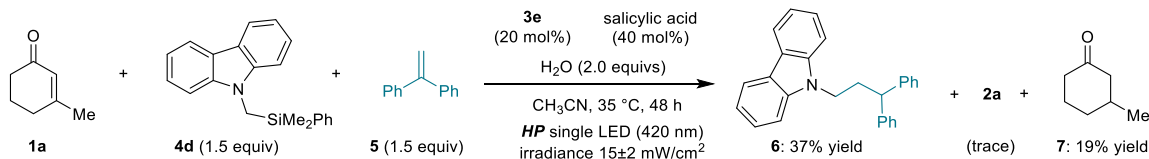

A 15 mL Schlenk tube was charged with the racemic primary amine catalyst **3e** (13.3 mg, 0.04 mmol, 20 mol%), salicylic acid (5.5 mg, 0.08 mmol, 40 mol%), 9-((dimethyl(phenyl)silyl)methyl)-9H-carbazole **4d** (47.3 mg, 0.15 mmol, 150 mol%), H<sub>2</sub>O (0.2 mmol, 200 mol%), 3-methylcyclohex-2-en-1-one **1a** (11.0 mg, 0.1 mmol, 100 mol%), ethene-1,1-diyldibenzene **5** (27.0 mg, 0.15 mmol, 150 mol%), and 200 μL CH<sub>3</sub>CN. The mixture was placed under an atmosphere of argon, cooled to -78 °C, and degassed *via* vacuum evacuation (5 min), backfilled with argon, and warmed to ambient temperature. The freeze-pump-thaw cycle was repeated three times, and then the Schlenk tube was sealed with Parafilm and placed into a 3D-printed plastic support mounted on an aluminium block fitted with a 420 nm high-power single LED ( $\lambda = 420$  nm). The irradiance was fixed at  $15 \pm 2$  mW/cm<sup>2</sup>, as controlled by an external power supply and measured using a photodiode light detector at the start of each reaction; the temperature was kept at 35 °C with a chiller connected to the irradiation plate (the setup is the same as in Supplementary Figure 1). Stirring was maintained for 48 hours, and then the irradiation was stopped. The reaction mixture was analyzed by NMR and GC-MS spectroscopic analysis, confirming the formation of radical addition product **6** in 37% NMR yield (using 0.1 mmol trichloroethylene as the internal standard). The use of semi-preparative HPLC method enabled us to get the pure product **6** as a white solid.

<sup>1</sup>H NMR (500 MHz, CDCl<sub>3</sub>): δ 8.09 (dt, *J* = 7.8, 1.0 Hz, 2H), 7.40 (ddd, *J* = 8.3, 7.1, 1.2 Hz, 2H), 7.32 (dd, *J* = 8.0, 6.9 Hz, 4H), 7.27 (dd, *J* = 8.8, 1.8 Hz, 4H), 7.25-7.19 (m, 4H), 7.16 (dd, *J* = 8.2, 0.9 Hz, 2H), 4.32-4.21 (m, 2H), 4.02 (t, *J* = 7.9 Hz, 1H), 2.67-2.54 (m, 2H).



$^{13}\text{C}$  NMR (126 MHz,  $\text{CDCl}_3$ ):  $\delta$  144.1, 140.4, 128.9, 127.9, 126.8, 125.7, 123.1, 120.5, 119.0, 108.8, 49.0, 41.7, 34.4.

HRMS: Calculated for  $\text{C}_{27}\text{H}_{24}\text{N}$  ( $\text{M}+\text{H}^+$ ): 362.1903, found 362.1905.

Control experiments performed in the absence of light or primary amine catalyst **3e** system did not lead to the formation of any radical addition product.

### Intercepting the $\beta$ -Enaminyl Radical Intermediate with 1,4-Cyclohexadiene

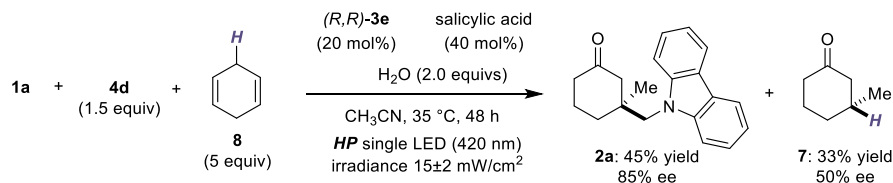

A 15 mL Schlenk tube was charged with the primary amine catalyst  $(R,R)$ -**3e** (13.3 mg, 0.04 mmol, 20 mol%), salicylic acid (5.5 mg, 0.08 mmol, 40 mol%), 9-((dimethyl(phenyl)silyl)methyl)-9H-carbazole **4d** (47.3 mg, 0.15 mmol, 150 mol%),  $\text{H}_2\text{O}$  (0.2 mmol, 200 mol%), 3-methylcyclohex-2-en-1-one **1a** (11.0 mg, 0.1 mmol, 100 mol%), 1,4-cyclohexadiene **8** (40.1 mg, 0.5 mmol, 500 mol%), and 200  $\mu\text{L}$  of  $\text{CH}_3\text{CN}$ . The mixture was placed under an atmosphere of argon, cooled to  $-78$  °C, and degassed *via* vacuum evacuation (5 min), backfilled with argon, and warmed to room temperature. The freeze-pump-thaw cycle was repeated three times, and then the Schlenk tube was sealed with parafilm and placed into a 3D-printed plastic support mounted on an aluminium block fitted with a 420 nm high-power single LED ( $\lambda = 420$  nm). The irradiance was fixed at  $15\pm 2$  mW/cm<sup>2</sup>, as controlled by an external power supply and measured using a photodiode light detector at the start of each reaction; the temperature was kept at 35 °C with a chiller connected to the irradiation plate (the setup is the same as in Supplementary Figure 1). Stirring was maintained for 48 hours, and then the irradiation was stopped. The reaction mixture was analyzed by NMR (using 0.1 mmol of trichloroethylene as the internal standard) and GC-MS spectroscopic analysis, confirming the formation of radical addition product **2a** (45% NMR yield) and 3-methylcyclohexan-1-one **7** (33% NMR yield). Both the NMR and GC-MS spectroscopic traces of **7** are in accordance with the authentic sample, bought from Sigma-Aldrich Company.

In order to check the enantiomeric excess of product **7**, 4-methylbenzenesulfonylhydrazine (37.2 mg, 0.2 mmol) and 1 mL MeOH was added to the reaction mixture, and then stirred for two hours. The crude material was purified by flash column chromatography on silicon gel (hexane/ethyl acetate: gradient from 10:1 to 4:1), to afford the corresponding cyclic hydrazone product (white solid,  $Z/E = 1:1$ ). The enantioselectivity of the hydrazone was measured by Waters ACQUITY<sup>®</sup> UPC<sup>2</sup> instrument (condition: UPC<sup>2</sup>, Trefoil AMY-1 column, 100%  $\text{CO}_2$  to 60/40  $\text{CO}_2/\text{MeCN}$  over 4 minutes, flow rate: 3.00 mL/min,  $\lambda = 230$  nm,  $\tau_{\text{Major}}(Z, E) = 4.2, 4.3$  min;  $\tau_{\text{Minor}}(Z, E) = 4.1, 4.4$  min). The absolute configuration of the hydrazone was determined to be *R* by comparison with the UPC<sup>2</sup> traces of an authentic sample of enantiopure  $(R)$ -hydrazone, prepared from the condensation of 4-methylbenzenesulfonylhydrazide with the commercially available  $(R)$ -**7** (Sigma-Aldrich Company).

Characterization of the hydrazone derived from product **7**:  $^1\text{H}$  NMR (500 MHz,  $\text{CDCl}_3$ ):  $\delta$  7.93 (s, br, 1H), 7.83 (d,  $J = 8.1$  Hz, 2H), 7.28 (d,  $J = 8.1$  Hz, 2H), 2.67-2.58 (m, 1H), 2.45-2.30 (m, 4H), 2.05-1.51 (m, 5H), 1.45-1.27 (m, 1H), 1.15-0.97 (m, 1H), 0.88 (t,  $J = 6.3$  Hz, 3H).

$^{13}\text{C}$  NMR (126 MHz,  $\text{CDCl}_3$ ):  $\delta$  143.9, 135.5, 129.5, 128.1, 43.3, 35.1, 34.9, 33.8, 33.5, 32.7, 26.5, 25.7, 24.7, 21.9, 21.8, 21.7.

HRMS: Calculated for  $\text{C}_{14}\text{H}_{19}\text{N}_2\text{O}_2\text{S}$  ( $\text{M}-\text{H}^+$ ): 279.1173, found: 279.1162.

Control experiments performed in the absence of light, primary amine catalyst **3** or salicylic acid did not lead to the formation of product **7**.

## Supplementary Note 4

### Synthetic applications

#### Synthesis of 15

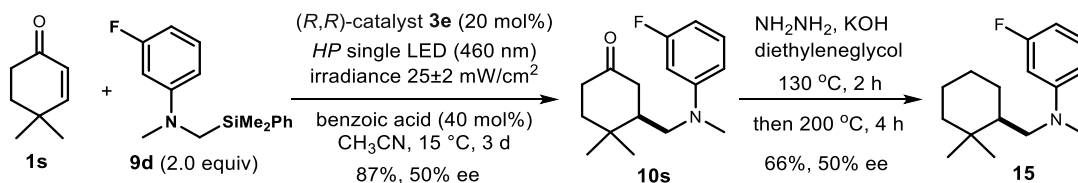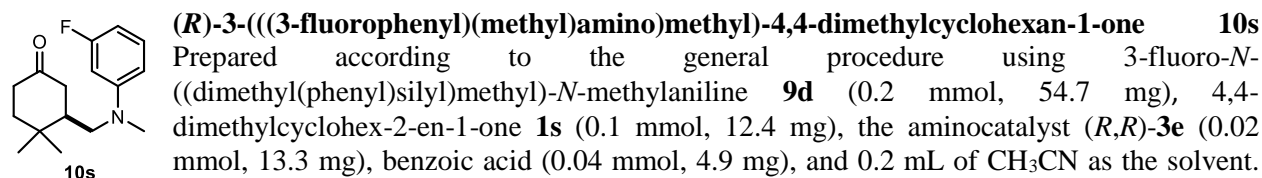

Time of irradiation: 3 days. The crude mixture was purified by flash column chromatography (hexane/ethyl acetate: gradient from 10:1 to 4:1) to afford the product as a colorless oil (22.9 mg, 87% yield, 50% ee). The enantiomeric excess was determined to be 50% by HPLC analysis on a Daicel Chiralpak IC-3: 90/10 hexane/IPA, flow rate 1.0 mL/min,  $\lambda = 254$  nm:  $\tau_{Major} = 14.7$  min,  $\tau_{Minor} = 17.1$  min.

$[\alpha]_D^{25} = -19.3$  ( $c = 0.06$ , CHCl<sub>3</sub>, 50% ee).

<sup>1</sup>H NMR (500 MHz, CDCl<sub>3</sub>):  $\delta$  7.12 (td,  $J = 8.2, 7.1$  Hz, 1H), 6.54-6.23 (m, 3H), 3.62 (dd,  $J = 14.7, 3.6$  Hz, 1H), 3.03 (dd,  $J = 14.7, 10.8$  Hz, 1H), 2.91 (s, 3H), 2.49-2.34 (m, 2H), 2.30 (dddd,  $J = 15.1, 4.9, 4.0, 2.2$  Hz, 1H), 2.19 (ddd,  $J = 14.6, 11.9, 1.0$  Hz, 1H), 2.11-2.00 (m, 1H), 1.77-1.62 (m, 2H), 1.19 (s, 3H), 1.13 (s, 3H). <sup>13</sup>C NMR (126 MHz, CDCl<sub>3</sub>):  $\delta$  211.2, 164.3 (d,  $J = 242.0$  Hz), 151.1 (d,  $J = 10.6$  Hz), 130.3 (d,  $J = 10.3$  Hz), 107.7 (d,  $J = 2.1$  Hz), 102.8 (d,  $J = 21.7$  Hz), 99.1 (d,  $J = 26.2$  Hz), 54.3, 44.8, 42.0, 40.7, 40.0, 38.3, 32.4, 28.8, 19.9.

<sup>19</sup>F NMR (376 MHz, CDCl<sub>3</sub>):  $\delta$  -112.50.

HRMS: Calculated for C<sub>16</sub>H<sub>22</sub>FNNaO (M+Na<sup>+</sup>): 286.1578, found 285.1569.

#### **(*R*)-*N*-((2,2-dimethylcyclohexyl)methyl)-3-fluoro-*N*-methylaniline **15****

A solution of the ketone **10s** (18.3 mg, 0.069 mmol), KOH (20 mg, 0.35 mmol, 5 equiv), and hydrazine monohydrate (20  $\mu$ L, 10 equiv) in diethylene glycol (0.15 mL) was heated to 130 °C during 2 h and then heated to reflux (200 °C) for 4 h. The mixture was cooled to room temperature and direct purification via flash chromatography to afford the product as colorless oil. (11.4 mg, 66%, 50% ee). The enantiomeric excess was determined to be 91% by UPC<sup>2</sup> analysis on a Acquity Trefoil IB column with a gradient (100% CO<sub>2</sub> to 60/40 CO<sub>2</sub>/MeOH over 2 minutes, curve 6), flow rate 3 mL/min,  $\lambda = 230$  nm:  $\tau_{Major} = 1.83$  min,  $\tau_{Minor} = 2.03$  min.  $[\alpha]_D^{25} = +15.1$  ( $c = 0.11$ , CHCl<sub>3</sub>, 50% ee).

<sup>1</sup>H NMR (400 MHz, CDCl<sub>3</sub>):  $\delta$  7.12 (td,  $J = 8.2, 7.1$  Hz, 1H), 6.47-6.25 (m, 3H), 3.55 (dd,  $J = 14.6, 3.1$  Hz, 1H), 2.96-2.97 (m, 4H), 1.71-1.65 (m, 1H), 1.61-1.52 (m, 2H), 1.51-1.42 (m, 1H), 1.42-1.31 (m, 2H), 1.27-1.10 (m, 3H), 1.07 (s, 3H), 0.88 (s, 3H).

<sup>13</sup>C NMR (101 MHz, CDCl<sub>3</sub>):  $\delta$  164.3 (d,  $J = 241.1$  Hz), 151.6, 130.1 (d,  $J = 10.6$  Hz), 107.4, 101.9 (d,  $J = 21.5$  Hz), 98.7 (d,  $J = 26.0$  Hz), 54.4, 44.8, 42.3, 39.9, 32.0, 30.6, 26.79, 26.5, 22.5, 19.7.

<sup>19</sup>F NMR (376 MHz, CDCl<sub>3</sub>):  $\delta$  -112.89.

HRMS: Calculated for C<sub>16</sub>H<sub>25</sub>FN (M+H<sup>+</sup>): 250.1966, found 250.1958.

## Synthesis of *cis*-16

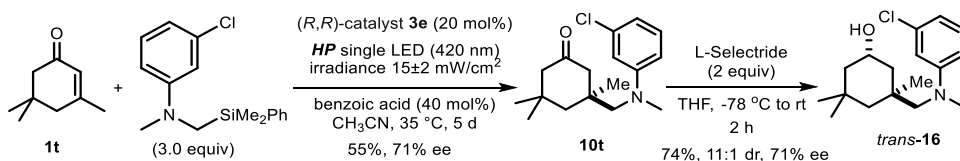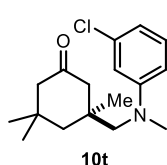

### (*S*)-3-(((3-chlorophenyl)(methyl)amino)methyl)-3,5,5-trimethylcyclohexan-1-one **10t**

Prepared according to the general procedure using 3-chloro-*N*-((dimethyl(phenyl)silyl)methyl)-*N*-methylaniline **9c** (0.3 mmol, 86.7 mg), 3,5,5-trimethylcyclohex-2-en-1-one **1t** (0.1 mmol, 13.8 mg), the aminocatalyst (*R,R*)-**3e** (0.02 mmol, 13.3 mg), benzoic acid (0.04 mmol, 4.9 mg), and 0.2 mL of CH<sub>3</sub>CN as the solvent. Time of irradiation: 5 days. The crude mixture was purified by flash column chromatography (hexane/ethyl acetate: gradient from 10:1 to 4:1) to afford the product as a green oil (16.1 mg, 55% yield, 71% ee). The enantiomeric excess was determined to be 71% by HPLC analysis on a Daicel Chiralpak IC-3: 90/10 hexane/IPA, flow rate 1.0 mL/min,  $\lambda = 230$  nm:  $\tau_{Major} = 9.9$  min,  $\tau_{Minor} = 9.0$  min.  $[\alpha]_D^{25} = -8.2$  ( $c = 0.12$ , CHCl<sub>3</sub>, 71% ee).

<sup>1</sup>H NMR (400 MHz, CDCl<sub>3</sub>):  $\delta$  7.11 (dd,  $J = 8.5, 7.8$  Hz, 1H), 6.85-6.50 (m, 3H), 3.18 (s, 2H), 3.00 (s, 3H), 2.56-2.36 (m, 1H), 2.36-2.00 (m, 3H), 1.79 (d,  $J = 13.9$  Hz, 1H), 1.52 (d,  $J = 13.9$  Hz, 1H), 1.08 (s, 3H), 1.06 (s, 3H), 1.06 (s, 3H).

<sup>13</sup>C NMR (101 MHz, CDCl<sub>3</sub>):  $\delta$  211.8, 151.7, 135.1, 130.0, 116.5, 112.3, 110.5, 65.1, 54.0, 51.3, 48.4, 43.5, 42.4, 36.2, 34.3, 29.4, 25.5.

HRMS: Calculated for C<sub>17</sub>H<sub>24</sub>ClNNaO ( $M+Na^+$ ): 316.1439, found 316.1439.

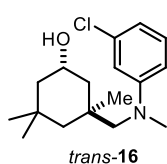

### (*1S,3S*)-3-(((3-chlorophenyl)(methyl)amino)methyl)-3,5,5-trimethylcyclohexan-1-ol **16**

To a stirred solution of ketone **10t** (16.1 mg, 0.055 mmol) in THF (0.5 mL) was dropwise added L-selectride (1.0 M in THF, 0.11 mL, 0.11 mmol, 2.0 equiv) at -78 °C. After 5 minutes stirring, the reaction mixture was warmed to 0 °C and stirring was continued at the same temperature for 2 hours. An aqueous saturated solution of potassium sodium tartrate (4 mL) was added and the resulting mixture was vigorously stirred at room temperature for 20 minutes. CH<sub>2</sub>Cl<sub>2</sub> (4 mL) was added to the mixture. The organic phase was separated, and the aqueous layer was extracted with CH<sub>2</sub>Cl<sub>2</sub> (2 × 4 mL). The combined organic extracts were washed with brine (6 mL), dried over anhydrous Na<sub>2</sub>SO<sub>4</sub>, and concentrated under reduced pressure. The residue was purified by flash column chromatography on silica gel eluting with Et<sub>2</sub>O/*n*-hexane (from 1:4 to 4:1) to afford the corresponding *trans*-**17** adduct (12.0 mg, 0.04 mmol, 74% yield) as a colorless liquid. The enantiomeric excess was determined to be 71% by UPC<sup>2</sup> analysis on a Acquity Trefoil CEL1 column with a gradient (100% CO<sub>2</sub> to 60/40 CO<sub>2</sub>/MeOH over 5 minutes, curve 6), flow rate 2 mL/min,  $\lambda = 215$  nm:  $\tau_{Major} = 3.70$  min,  $\tau_{Minor} = 3.65$  min.  $[\alpha]_D^{25} = -15.6$  ( $c = 0.12$ , CHCl<sub>3</sub>, 71% ee).

<sup>1</sup>H NMR (400 MHz, CD<sub>3</sub>OD):  $\delta$  7.10 (t,  $J = 8.1$  Hz, 1H), 6.71-6.65 (m, 2H), 6.57 (ddd,  $J = 7.8, 1.9, 0.8$  Hz, 1H), 4.03 (tt,  $J = 11.1, 3.9$  Hz, 1H), 3.57 (d,  $J = 15.3$  Hz, 1H), 3.19 (dd,  $J = 15.4, 1.3$  Hz, 1H), 3.01 (s, 3H), 2.06 (ddd,  $J = 13.2, 3.9, 2.0$  Hz, 1H), 1.75 (ddt,  $J = 12.5, 4.0, 2.0$  Hz, 1H), 1.46 (dt,  $J = 14.2, 1.9$  Hz, 1H), 1.15 (d,  $J = 14.1$  Hz, 1H), 1.08 (s, 3H), 1.06 (d,  $J = 2.7$  Hz, 1H), 1.00 (s, 3H), 0.96-0.94 (m, 1H), 0.92 (s, 3H).

<sup>13</sup>C NMR (101 MHz, CD<sub>3</sub>OD):  $\delta$  153.4, 135.9, 130.9, 116.5, 112.9, 111.6, 66.1, 60.4, 51.8, 45.9, 42.2, 41.1, 35.5, 33.2, 30.8, 29.3.

HRMS: Calculated for C<sub>17</sub>H<sub>26</sub>ClNNaO ( $M+Na^+$ ): 318.1595, found 318.1601.

The stereochemical assignment of compound **16** was based on <sup>1</sup>H-<sup>1</sup>H NOESY spectroscopic experiments performed on a 400 MHz instrument. Diagnostic interactions are shown in Supplementary Figure 47.

## Supplementary Methods

The NMR spectra were recorded at 400 MHz or 500 MHz for  $^1\text{H}$ , 101 or 126 MHz for  $^{13}\text{C}$ , 286 MHz for  $^{19}\text{F}$ , and 162 MHz for  $^{31}\text{P}$ . The chemical shift ( $\delta$ ) for  $^1\text{H}$  and  $^{13}\text{C}$  are given in ppm relative to residual signals of the solvents ( $\text{CHCl}_3$  @ 7.26 ppm  $^1\text{H}$  NMR and 77.16 ppm  $^{13}\text{C}$  NMR, or  $\text{CD}_3\text{OD}$  @ 3.31 ppm  $^1\text{H}$  NMR and 49.00 ppm  $^{13}\text{C}$  NMR, and tetramethylsilane @ 0 ppm). Coupling constants are given in Hertz. The following abbreviations are used to indicate the multiplicity: s, singlet; d, doublet; q, quartet; p, pentet; sept, septet; m, multiplet; br, broad signal. NMR yields were determined by adding trichloroethylene ( $\text{Cl}_2=\text{ClH}$ ,  $\delta = 6.44$  ppm) as an internal standard to the crude reaction mixtures and by integration of diagnostic signals. High-resolution mass spectra (HRMS) were obtained from the ICIQ High Resolution Mass Spectrometry Unit on MicroTOF Focus and Maxis Impact (Bruker Daltonics) with electrospray ionization. UV-vis measurements were carried out on a Shimadzu UV-2401PC spectrophotometer equipped with photomultiplier detector, double beam optics and  $\text{D}_2$  and W light sources. Cyclic voltammetry studies were carried out on an IJ-Cambria HI-730 Bipotentiostat using a three-electrode cell, offering compliance voltage up to  $\pm 100$  V (available at the counter electrode),  $\pm 10$  V scan range and  $\pm 2$  A current range.

**General Procedures.** All reactions were set up under an argon atmosphere in oven-dried glassware using standard Schlenk techniques, unless otherwise stated. Synthesis grade solvents were used as purchased. Anhydrous solvents were taken from a commercial SPS solvent dispenser. Chromatographic purification of products was accomplished using force-flow chromatography (FC) on silica gel (35-70 mesh). For thin layer chromatography (TLC) analysis throughout this work, Merck pre-coated TLC plates (silica gel 60 GF<sub>254</sub>, 0.25 mm) were employed, using UV light as the visualizing agent. Organic solutions were concentrated under reduced pressure on a Büchi rotary evaporator (*in vacuo* at 40 °C, ~5 mbar).

**Determination of Enantiomeric Purity:** HPLC analysis on chiral stationary phase was performed on an Agilent 1200-series instrument, employing Daicel Chiralpak ID and IC-3 columns, or on a Waters ACQUITY® UPC<sup>2</sup> instrument, using a Trefoil AMY1, IB, CEL1 chiral column. The exact conditions for the analyses are specified within the characterization section. HPLC traces were compared to racemic samples prepared performing the reaction in the presence of the racemic carbazole-derived primary amine catalyst **3d**.

**Materials.** Commercial grade reagents and solvents were purchased from Sigma-Aldrich, Fluka, Alfa Aesar, and Fluorochem at the highest commercial quality and used without further purification, unless otherwise stated. Starting material, including 3-methyl-2-cyclohexenone **1a**, 3-methyl-2-cyclopentenone, linear enones **1q-r**,  $\text{ClCH}_2\text{SiMe}_2\text{Ph}$ , and *N*-phenylglycine were purchased from commercial source and used as received. All other cyclic enones **1** were prepared following a literature procedure.<sup>4,5</sup> The preparation of carbazole substituted silanes **4** and aniline-derived silanes **9** is detailed in Supplementary Note 1. The chiral primary amine catalysts **3a-3d** were prepared according to procedures reported in the literature.<sup>1,6</sup> (Benzyloxy)methyl substituted dihydropyridine **13** was prepared according to a reported literature procedure.<sup>7</sup>

## General Procedure for the Photochemical Reactions

### Light Illumination System and General Procedure

A 15 mL Schlenk tube was charged with the chiral carbazole-derived primary amine catalyst (*R,R*)-**3e** (0.04 mmol, 20 mol%), acid (0.08 mmol, 40 mol%, salicylic acid for substrate **4** and benzoic acid for substrates **9**), the organic silane **4** or **9** (0.15 mmol, 150 mol%), enone **1** (0.1 mmol, 100 mol%), H<sub>2</sub>O (0.2 mmol, 200 mol%) and 200  $\mu$ L of CH<sub>3</sub>CN. The mixture was placed under an atmosphere of argon, cooled with liquid nitrogen, and degassed *via* vacuum evacuation (5 min), backfilled with argon, and warmed to room temperature. The freeze-pump-thaw cycle was repeated three times, and then the Schlenk tube was placed into a 3D-printed plastic support mounted on an aluminium block fitted with a 420 nm high-power single LED ( $\lambda = 420$  nm). The irradiance was regulated at  $15 \pm 2$  mW/cm<sup>2</sup>, as controlled by an external power supply and measured using a photodiode light detector at the start and the end of each reaction; the temperature was kept at 35 °C with a chiller connected to the irradiation plate (the setup is detailed in Supplementary Figure 1). This setup secured a reliable irradiation and temperature while keeping a distance of 1 cm between the reaction vessel and the light source. Stirring was maintained for the indicated time (generally 48 hours), and then the irradiation was stopped. The reaction volatiles were removed in vacuum and the residue was purified by column chromatography to give the products **2** or **10** in the stated yield and enantiomeric purity. The reported yield and ee are average of two runs per substrate.

### Characterization of Products

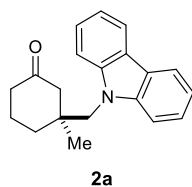

#### (*S*)-3-((9*H*-carbazol-9-yl)methyl)-3-methylcyclohexan-1-one **2a**

Prepared according to general procedure using 9-((dimethyl(phenyl)silyl)methyl)-9*H*-carbazole **4d** (0.15 mmol, 47.3 mg), 3-methyl-2-cyclohexenone (0.1 mmol, 11.0 mg), the aminocatalyst (*R,R*)-**3e** (0.02 mmol, 13.3 mg) salicylic acid (0.04 mmol, 5.5 mg), and 0.2 mL of CH<sub>3</sub>CN as the solvent. Time of irradiation: 48 hours. The crude mixture was purified by flash column chromatography (hexane/ethyl acetate: gradient from 10:1 to 4:1) to afford the product as a white solid. (21.6 mg, 74% yield, 88% ee). The enantiomeric excess was determined to be 88% by HPLC analysis on a Daicel Chiralpak IC-3: 95/5 hexane/IPA, flow rate 1.0 mL/min,  $\lambda = 254$  nm:  $\tau_{Major} = 21.2$  min,  $\tau_{Minor} = 30.4$  min.  $[\alpha]_D^{25} = +2.95$  ( $c = 0.75$ , CHCl<sub>3</sub>, 88% ee).

*Absolute configuration determined by X-ray analysis, CCDC 1819014 (see Supplementary Table 1 for details).*

**<sup>1</sup>H NMR** (500 MHz, CDCl<sub>3</sub>):  $\delta$  8.11 (d,  $J = 7.7$  Hz, 2H), 7.51-7.35 (m, 4H), 7.30-7.13 (m, 2H), 4.18 (q,  $J = 15.2$  Hz, 2H), 2.49 (d,  $J = 13.4$  Hz, 1H), 2.39-2.21 (m, 2H), 2.15-2.04 (m, 1H), 2.02-1.93 (m, 1H), 1.92-1.72 (m, 3H), 1.13 (s, 3H).

**<sup>13</sup>C NMR** (126 MHz, CDCl<sub>3</sub>):  $\delta$  211.0, 142.0, 125.9, 123.3, 120.4, 119.4, 109.9, 54.8, 52.6, 43.7, 40.6, 35.3, 23.1, 22.1.

**HRMS**: Calculated for C<sub>20</sub>H<sub>21</sub>NONa (M+Na<sup>+</sup>): 314.1515, found 314.1503.

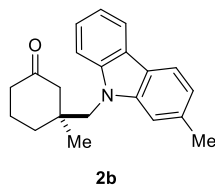

#### (*S*)-3-methyl-3-((2-Methyl-9*H*-carbazol-9-yl)methyl)cyclohexan-1-one **2b**

Prepared according to general procedure using 9-((dimethyl(phenyl)silyl)methyl)-2-methyl-9*H*-carbazole **4e** (0.15 mmol, 49.4 mg), 3-methyl-2-cyclohexenone (0.1 mmol, 11.0 mg), the aminocatalyst (*R,R*)-**3e** (0.02 mmol, 13.3 mg) salicylic acid (0.04 mmol, 5.5 mg) and 0.2 mL of CH<sub>3</sub>CN as the solvent. Time of irradiation: 48 hours. The crude mixture was purified by flash column chromatography (hexane/ethyl acetate: gradient from 10:1 to 4:1) to afford the product as a colorless oil. (25.1 mg, 82% yield, 84% ee). The enantiomeric excess was determined to be 84% by HPLC analysis on a Daicel Chiralpak IC-3: 90/10 hexane/IPA, flow rate 1.0 mL/min,  $\lambda = 254$  nm:  $\tau_{Major} = 15.8$  min,  $\tau_{Minor} = 12.5$  min.  $[\alpha]_D^{26} = +2.6$  ( $c = 1.48$ , CHCl<sub>3</sub>, 84% ee). *Absolute configuration determined in comparison to compound 2a.*

**<sup>1</sup>H NMR** (500 MHz, CDCl<sub>3</sub>):  $\delta$  8.05 (dt,  $J = 7.7, 0.9$  Hz, 1H), 7.97 (d,  $J = 7.9$  Hz, 1H), 7.45-7.35 (m, 2H), 7.23 (ddd,  $J = 7.9, 6.8, 1.3$  Hz, 1H), 7.19 (s, 1H), 7.08 (dd,  $J = 7.9, 0.7$  Hz, 1H), 4.13 (q,  $J = 15.2$  Hz, 2H),

2.57 (s, 3H), 2.53-2.45 (m, 1H), 2.36-2.25 (m, 2H), 2.13-2.03 (m, 1H), 2.02-1.94 (m, 1H), 1.91-1.73 (m, 3H), 1.13 (s, 3H).

$^{13}\text{C NMR}$  (126 MHz,  $\text{CDCl}_3$ ):  $\delta$  211.1, 142.5, 140.0, 136.0, 125.3, 123.4, 121.0, 121.0, 120.1, 120.0, 119.3, 110.0, 109.8, 54.7, 52.6, 43.7, 40.6, 35.2, 23.1, 22.5, 22.1.

**HRMS:** Calculated for  $\text{C}_{21}\text{H}_{23}\text{NNaO}$  ( $\text{M}+\text{Na}^+$ ): 328.1672, found 328.1682.

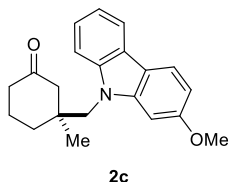

**(S)-3-((2-methoxy-9H-carbazol-9-yl)methyl)-3-methylcyclohexan-1-one 2c**

Prepared according to general procedure using 9-((dimethyl(phenyl)silyl)methyl)-2-methoxy-9H-carbazole **4f** (0.15 mmol, 51.8 mg), 3-methyl-2-cyclohexenone (0.1 mmol, 11.0 mg), the aminocatalyst (*R,R*)-**3e** (0.02 mmol, 13.3 mg), salicylic acid (0.04 mmol, 5.5 mg), and 0.2 mL  $\text{CH}_3\text{CN}$  as the solvent. Time of irradiation: 48 hours.

The crude mixture was purified by flash column chromatography (hexane/ethyl acetate: gradient from 10:1 to 4:1) to afford the product as a white solid. (26.4 mg, 82% yield, 87% ee). The enantiomeric excess was determined to be 87% by HPLC analysis on a Daicel Chiralpak IC-3: 90/10 hexane/IPA, flow rate 1.0 mL/min,  $\lambda = 254$  nm:  $\tau_{\text{Major}} = 28.3$  min,  $\tau_{\text{Minor}} = 20.8$  min.  $[\alpha]_{\text{D}}^{26} = +2.5$  ( $c = 1.40$ ,  $\text{CHCl}_3$ , 87% ee). Absolute configuration determined in comparison to compound **2a**.

$^1\text{H NMR}$  (500 MHz,  $\text{CDCl}_3$ ):  $\delta$  8.03-7.90 (m, 2H), 7.40-7.33 (m, 2H), 7.22 (ddd,  $J = 8.0, 6.3, 1.8$  Hz, 1H), 6.90-6.83 (m, 2H), 4.10 (q,  $J = 15.2$  Hz, 2H), 3.94 (s, 3H), 2.53-2.48 (m, 1H), 2.33-2.25 (m, 2H), 2.15-2.06 (m, 1H), 2.02-1.93 (m, 1H), 1.92-1.75 (m, 3H), 1.12 (s, 3H).

$^{13}\text{C NMR}$  (126 MHz,  $\text{CDCl}_3$ ):  $\delta$  211.0, 159.1, 143.4, 142.1, 124.6, 123.5, 121.0, 119.6, 119.5, 117.3, 109.7, 107.4, 94.8, 55.9, 54.7, 52.6, 43.7, 40.6, 35.4, 23.2, 22.1.

**HRMS:** Calculated for  $\text{C}_{21}\text{H}_{23}\text{NNaO}_2$  ( $\text{M}+\text{Na}^+$ ): 344.1621, found 344.1619.

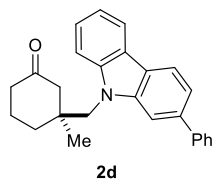

**(S)-3-methyl-3-((2-phenyl-9H-carbazol-9-yl)methyl)cyclohexan-1-one 2d**

Prepared according to general procedure using 9-((dimethyl(phenyl)silyl)methyl)-2-phenyl-9H-carbazole **4g** (0.15 mmol, 58.7 mg), 3-methyl-2-cyclohexenone (0.1 mmol, 11.0 mg), the aminocatalyst (*R,R*)-**3e** (0.02 mmol, 13.3 mg), salicylic acid (0.04 mmol, 5.5 mg), and 0.2 mL of  $\text{CH}_3\text{CN}$  and 40  $\mu\text{L}$  of toluene as solvent mixture. Time of irradiation: 48 hours. The crude mixture was purified by flash column chromatography

(hexane/ethyl acetate: gradient from 10:1 to 4:1) to afford the product as a light yellow solid (27.6 mg, 75% yield, 85% ee). The enantiomeric excess was determined to be 86% by HPLC analysis on a Daicel Chiralpak IC-3: 90/10 hexane/IPA, flow rate 1.0 mL/min,  $\lambda = 254$  nm:  $\tau_{\text{Major}} = 22.4$  min,  $\tau_{\text{Minor}} = 15.4$  min.  $[\alpha]_{\text{D}}^{26} = +2.1$  ( $c = 0.76$ ,  $\text{CHCl}_3$ , 86% ee). Absolute configuration determined in comparison to compound **2a**.

$^1\text{H NMR}$  (500 MHz,  $\text{CDCl}_3$ ):  $\delta$  8.18-8.09 (m, 2H), 7.72-7.68 (m, 2H), 7.59 (d,  $J = 1.4$  Hz, 1H), 7.53-7.35 (m, 6H), 7.31-7.24 (m, 1H), 4.22 (q,  $J = 15.3$  Hz, 2H), 2.57-2.51 (m, 1H), 2.39-2.33 (m, 1H), 2.32-2.26 (m, 1H), 2.16-2.07 (m, 1H), 2.02-1.95 (m, 1H), 1.92-1.80 (m, 3H), 1.15 (s, 3H).

$^{13}\text{C NMR}$  (126 MHz,  $\text{CDCl}_3$ ):  $\delta$  210.9, 142.5, 142.5, 142.2, 139.5, 129.0, 127.7, 127.3, 125.9, 123.1, 122.6, 120.6, 120.4, 119.7, 119.3, 109.9, 108.5, 54.8, 52.6, 43.8, 40.6, 35.3, 23.2, 22.1.

**HRMS:** Calculated for  $\text{C}_{26}\text{H}_{25}\text{NNaO}$  ( $\text{M}+\text{Na}^+$ ): 390.1828, found 390.1826.

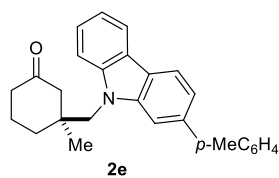

**(S)-3-((2-(4-methylphenyl)-9H-carbazol-9-yl)methyl)-3-methylcyclohexan-1-one 2e**

Prepared according to general procedure using 9-((dimethyl(phenyl)silyl)methyl)-2-(4-methylphenyl)-9H-carbazole **4h** (0.15 mmol, 60.8 mg), 3-methyl-2-cyclohexenone (0.1 mmol, 11.0 mg), the aminocatalyst (*R,R*)-**3e** (0.02 mmol, 13.3 mg), salicylic acid (0.04 mmol, 5.5 mg),

0.2 mL of  $\text{CH}_3\text{CN}$  and 0.2 mL of 1,2- $\text{Cl}_2\text{C}_6\text{H}_4$  as solvent mixture. Time of irradiation: 72 hours. The crude mixture was purified by flash column chromatography (hexane/ethyl acetate: gradient from 10:1 to 4:1) to afford the product as a white solid (36.3 mg, 95% yield, 87% ee). The enantiomeric excess was determined to be 87% by HPLC analysis on a Daicel Chiralpak IC-3: 90/10 hexane/IPA, flow rate 1.0 mL/min,  $\lambda = 254$

nm:  $\tau_{Major} = 28.7$  min,  $\tau_{Minor} = 17.8$  min.  $[\alpha]_D^{25} = +2.09$  ( $c = 1.24$ ,  $\text{CHCl}_3$ , 87% ee). Absolute configuration determined in comparison to compound **2a**.

**$^1\text{H NMR}$**  (500 MHz,  $\text{CDCl}_3$ ):  $\delta$  8.16 – 8.08 (m, 2H), 7.63-7.59 (m, 2H), 7.57 (d,  $J = 1.4$  Hz, 1H), 7.50-7.44 (m, 2H), 7.43-7.37 (m, 1H), 7.34-7.29 (m, 2H), 7.29-7.22 (m, 1H), 4.31-4.11 (m, 2H), 2.58-2.51 (m, 1H), 2.44 (s, 3H), 2.38-2.33 (m, 1H), 2.30-2.24 (m, 1H), 2.14-2.06 (m, 1H), 2.01-1.94 (m, 1H), 1.92-1.75 (m, 3H), 1.15 (s, 3H).

**$^{13}\text{C NMR}$**  (126 MHz,  $\text{CDCl}_3$ ):  $\delta$  211.0, 142.6, 142.5, 139.4, 139.3, 137.1, 133.2, 129.7, 128.0, 127.6, 125.8, 123.2, 122.4, 120.6, 120.4, 119.6, 119.1, 109.9, 108.2, 54.7, 52.6, 43.8, 40.6, 35.3, 23.2, 22.1, 21.3.

**HRMS**: Calculated for  $\text{C}_{27}\text{H}_{27}\text{NNaO}$  ( $\text{M}+\text{Na}^+$ ): 404.1985, found 404.1984.

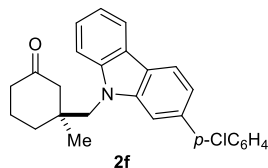

**(S)-3-((2-(4-chlorophenyl)-9H-carbazol-9-yl)methyl)-3-methylcyclohexan-1-one **2f****

Prepared according to general procedure using 9-((dimethyl(phenyl)silyl)methyl)-2-(4-chlorophenyl)-9H-carbazole **4i** (0.15 mmol, 63.9 mg), 3-methyl-2-cyclohexenone (0.1 mmol, 11.0 mg), the aminocatalyst (*R,R*)-**3e** (0.02 mmol, 13.3 mg), salicylic acid (0.04 mmol, 5.5 mg), 0.2 mL of  $\text{CH}_3\text{CN}$  and 40  $\mu\text{L}$  toluene as the solvent mixture. Time of irradiation: 48 hours. The crude mixture was purified by flash column chromatography (hexane/ethyl acetate: gradient from 10:1 to 4:1) to afford the product as a white solid (35.2 mg, 87% yield, 87% ee). The enantiomeric excess was determined to be 87% by HPLC analysis on a Daicel Chiralpak IC-3: 90/10 hexane/IPA, flow rate 1.0 mL/min,  $\lambda = 215$  nm:  $\tau_{Major} = 22.5$  min,  $\tau_{Minor} = 16.4$  min.  $[\alpha]_D^{25} = +1.72$  ( $c = 1.17$ ,  $\text{CHCl}_3$ , 87% ee). Absolute configuration determined in comparison to compound **2a**.

**$^1\text{H NMR}$**  (500 MHz,  $\text{CDCl}_3$ ):  $\delta$  8.16-8.06 (m, 2H), 7.65-7.59 (m, 2H), 7.54 (d,  $J = 1.5$  Hz, 1H), 7.49-7.41 (m, 5H), 7.30-7.25 (m, 1H), 4.21 (q,  $J = 15.3$  Hz, 2H), 2.54-2.47 (m, 1H), 2.37-2.26 (m, 2H), 2.17-2.07 (m, 1H), 2.01-1.94 (m, 1H), 1.91-1.79 (m, 3H), 1.14 (s, 3H).

**$^{13}\text{C NMR}$**  (126 MHz,  $\text{CDCl}_3$ ):  $\delta$  210.8, 142.5, 142.5, 140.6, 138.1, 133.4, 129.1, 128.9, 126.1, 123.0, 122.8, 120.7, 120.5, 119.7, 119.0, 110.0, 108.3, 54.6, 52.5, 43.8, 40.6, 35.4, 23.2, 22.1.

**HRMS**: Calculated for  $\text{C}_{26}\text{H}_{25}\text{ClNO}$  ( $\text{M}+\text{H}^+$ ): 402.1619, found 402.1621.

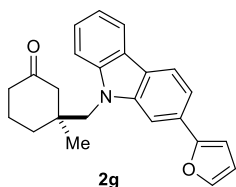

**(S)-3-((2-(furan-2-yl)-9H-carbazol-9-yl)methyl)-3-methylcyclohexan-1-one **2g****

Prepared according to general procedure using 9-((dimethyl(phenyl)silyl)methyl)-2-(furan-2-yl)-9H-carbazole **4j** (0.15 mmol, 57.2 mg), 3-methyl-2-cyclohexenone (0.1 mmol, 11.0 mg), the aminocatalyst (*R,R*)-**3e** (0.02 mmol, 13.3 mg), salicylic acid (0.04 mmol, 5.5 mg), and 0.2 mL of  $\text{CH}_3\text{CN}$  as the solvent. Time of irradiation: 72 hours. The crude mixture was purified by flash column chromatography (hexane/ethyl acetate: gradient from 10:1 to 4:1) to afford the product as a yellow oil (15.8 mg, 44% yield, 90% ee). The enantiomeric excess was determined to be 90% by HPLC analysis on a Daicel Chiralpak IC-3: 90/10 hexane/IPA, flow rate 1.0 mL/min,  $\lambda = 254$  nm:  $\tau_{Major} = 23.6$  min,  $\tau_{Minor} = 17.2$  min.  $[\alpha]_D^{25} = +1.47$  ( $c = 0.77$ ,  $\text{CHCl}_3$ , 90% ee). Absolute configuration determined in comparison to compound **2a**.

**$^1\text{H NMR}$**  (500 MHz,  $\text{CDCl}_3$ ):  $\delta$  8.07 (dd,  $J = 7.9, 1.7$  Hz, 2H), 7.76-7.69 (m, 1H), 7.60-7.51 (m, 2H), 7.48-7.36 (m, 2H), 7.31-7.15 (m, 1H), 6.76 (dd,  $J = 3.3, 0.7$  Hz, 1H), 6.53 (dd,  $J = 3.3, 1.8$  Hz, 1H), 4.21 (q,  $J = 15.3$  Hz, 2H), 2.52 (d,  $J = 13.2$  Hz, 1H), 2.36 (dt,  $J = 13.2, 2.1$  Hz, 1H), 2.31-2.25 (m, 1H), 2.15-2.07 (m, 1H), 2.01-1.94 (m, 1H), 1.90-1.78 (m, 3H), 1.15 (s, 3H).

**$^{13}\text{C NMR}$**  (126 MHz,  $\text{CDCl}_3$ ):  $\delta$  211.0, 154.9, 142.5, 142.3, 142.1, 128.8, 125.9, 123.2, 122.5, 120.6, 120.3, 119.7, 116.1, 112.0, 109.9, 105.2, 105.0, 54.7, 52.6, 43.8, 40.7, 35.3, 23.2, 22.1.

**HRMS**: Calculated for  $\text{C}_{24}\text{H}_{24}\text{NO}_2$  ( $\text{M}+\text{H}^+$ ): 358.1802, found 358.1804.

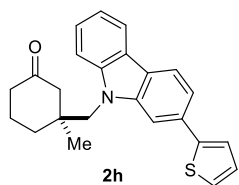

**(S)-3-methyl-3-((2-(thiophen-2-yl)-9H-carbazol-9-yl)methyl)cyclohexan-1-one 2h**

Prepared according to general procedure using 9-((dimethyl(phenyl)silyl)methyl)-2-(thiophen-2-yl)-9H-carbazole **4k** (0.15 mmol, 59.6 mg), 3-methyl-2-cyclohexenone (0.1 mmol, 11.0 mg), the aminocatalyst (*R,R*)-**3e** (0.02 mmol, 13.3 mg), salicylic acid (0.04 mmol, 5.5 mg), and 0.2 mL of CH<sub>3</sub>CN and 0.1 mL 1,2-Cl<sub>2</sub>C<sub>6</sub>H<sub>4</sub> as the solvent mixture. Time of irradiation: 72 hours. The crude mixture was purified by flash column chromatography (hexane/ethyl acetate: gradient from 10:1 to 4:1) to afford the product as a white solid (28.1 mg, 75% yield, 90% ee). The enantiomeric excess was determined to be 90% by HPLC analysis on a Daicel Chiralpak IC-3: 90/10 hexane/IPA, flow rate 1.0 mL/min,  $\lambda = 254$  nm:  $\tau_{Major} = 29.7$  min,  $\tau_{Minor} = 19.9$  min.  $[\alpha]_D^{25} = +2.0$  ( $c = 1.55$ , CHCl<sub>3</sub>, 90% ee). Absolute configuration determined in comparison to compound **2a**.

<sup>1</sup>H NMR (500 MHz, CDCl<sub>3</sub>):  $\delta$  8.09-8.05 (m, 2H), 7.61 (d,  $J = 1.4$  Hz, 1H), 7.53 (dd,  $J = 8.1, 1.5$  Hz, 1H), 7.45 (ddd,  $J = 8.3, 7.0, 1.2$  Hz, 1H), 7.43-7.38 (m, 2H), 7.32 (dd,  $J = 5.1, 1.1$  Hz, 1H), 7.26 (td,  $J = 7.4, 1.0$  Hz, 1H), 7.14 (dd,  $J = 5.1, 3.6$  Hz, 1H), 4.28-4.08 (m, 2H), 2.55-2.49 (m, 1H), 2.38-2.22 (m, 2H), 2.16-2.07 (m, 1H), 2.02-1.94 (m, 1H), 1.93-1.71 (m, 3H), 1.14 (s, 3H).

<sup>13</sup>C NMR (126 MHz, CDCl<sub>3</sub>):  $\delta$  210.8, 145.6, 142.5, 142.4, 132.4, 128.3, 126.0, 124.8, 123.3, 123.1, 122.8, 120.7, 120.4, 119.7, 118.2, 109.9, 107.2, 54.6, 52.5, 43.7, 40.6, 35.3, 23.2, 22.1.

HRMS: Calculated for C<sub>24</sub>H<sub>23</sub>NNaOS (M+Na<sup>+</sup>): 396.1393, found 396.1393.

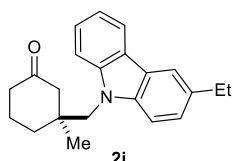

**(S)-3-methyl-3-((3-ethyl-9H-carbazol-9-yl)methyl)cyclohexan-1-one 2i**

Prepared according to general procedure using 9-((dimethyl(phenyl)silyl)methyl)-3-ethyl-9H-carbazole **4l** (0.15 mmol, 51.5 mg), 3-methyl-2-cyclohexenone (0.1 mmol, 11.0 mg), the aminocatalyst (*R,R*)-**3e** (0.02 mmol, 13.3 mg) salicylic acid (0.04 mmol, 5.5 mg), and 0.2 mL of CH<sub>3</sub>CN as solvent. Time of irradiation: 48 hours. The crude mixture was purified by flash column chromatography (hexane/ethyl acetate: gradient from 10:1 to 4:1) to afford the product as a white solid (27.2 mg, 85% yield, 88% ee). The enantiomeric excess was determined to be 88% by HPLC analysis on a Daicel Chiralpak IC-3: 90/10 hexane/IPA, flow rate 1.0 mL/min,  $\lambda = 254$  nm:  $\tau_{Major} = 14.70$  min,  $\tau_{Minor} = 11.19$  min.  $[\alpha]_D^{25} = +3.0$  ( $c = 1.38$ , CHCl<sub>3</sub>, 88% ee). Absolute configuration determined in comparison to compound **2a**.

<sup>1</sup>H NMR (500 MHz, CDCl<sub>3</sub>):  $\delta$  8.09 (d,  $J = 7.7$  Hz, 1H), 7.93 (d,  $J = 0.8$  Hz, 1H), 7.46-7.42 (m, 1H), 7.40-7.36 (m, 1H), 7.35-7.28 (m, 2H), 7.23 (ddd,  $J = 7.9, 7.0, 1.1$  Hz, 1H), 4.14 (q,  $J = 15.2$  Hz, 2H), 2.85 (q,  $J = 7.6$  Hz, 2H), 2.55-2.44 (m, 1H), 2.37-2.21 (m, 2H), 2.12-2.04 (m, 1H), 2.00-1.93 (m, 1H), 1.90-1.75 (m, 3H), 1.36 (t,  $J = 7.6$  Hz, 3H), 1.12 (s, 3H).

<sup>13</sup>C NMR (126 MHz, CDCl<sub>3</sub>):  $\delta$  211.1, 142.2, 140.5, 135.5, 126.1, 125.7, 123.4, 123.2, 120.3, 119.2, 119.1, 109.8, 109.7, 54.9, 52.6, 43.7, 40.6, 35.2, 29.0, 23.1, 22.1, 16.6.

HRMS: Calculated for C<sub>22</sub>H<sub>25</sub>NNaO (M+Na<sup>+</sup>): 342.1828, found 342.1843.

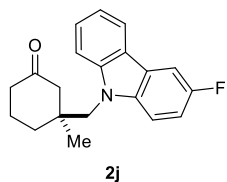

**(S)-3-((3-fluoro-9H-carbazol-9-yl)methyl)-3-methylcyclohexan-1-one 2j**

Prepared according to general procedure using 9-((dimethyl(phenyl)silyl)methyl)-3-fluoro-9H-carbazole **4m** (0.15 mmol, 50.0 mg), 3-methyl-2-cyclohexenone (0.1 mmol, 11.0 mg), the aminocatalyst (*R,R*)-**3e** (0.02 mmol, 13.3 mg), salicylic acid (0.04 mmol, 5.5 mg), and 0.3 mL of CH<sub>3</sub>CN as solvent. Time of irradiation: 48 hours. The crude mixture was purified by flash column chromatography (hexane/ethyl acetate: gradient from 10:1 to 4:1) to afford the product as a white solid (24.3 mg, 78% yield, 86% ee). The enantiomeric excess was determined to be 86% by HPLC analysis on a Daicel Chiralpak IC-3: 90/10 hexane/IPA, flow rate 1.0 mL/min,  $\lambda = 254$  nm:  $\tau_{Major} = 18.5$  min,  $\tau_{Minor} = 14.3$  min.  $[\alpha]_D^{25} = +3.3$  ( $c = 1.27$ , CHCl<sub>3</sub>, 86% ee). Absolute configuration determined in comparison to compound **2a**.

<sup>1</sup>H NMR (500 MHz, CDCl<sub>3</sub>):  $\delta$  8.06-8.00 (m, 1H), 7.74 (dd,  $J = 8.7, 2.5$  Hz, 1H), 7.49-7.45 (m, 1H), 7.42-7.38 (m, 1H), 7.34-7.30 (m, 1H), 7.27-7.22 (m, 1H), 7.19 (td,  $J = 9.0, 2.6$  Hz, 1H), 4.23-4.02 (m, 2H), 2.49-2.42 (m, 1H), 2.33-2.25 (m, 2H), 2.16-2.05 (m, 1H), 2.04-1.92 (m, 1H), 1.93-1.72 (m, 3H), 1.11 (s, 3H).



<sup>19</sup>F NMR (376 MHz, CDCl<sub>3</sub>): δ -124.8.

<sup>13</sup>C NMR (126 MHz, CDCl<sub>3</sub>): δ 210.7, 157.5 (d, *J* = 236.3 Hz), 142.8, 138.3, 126.5, 123.8 (d, *J* = 9.4 Hz), 122.8 (d, *J* = 4.1 Hz), 120.6, 119.4, 113.6 (d, *J* = 25.4 Hz), 110.4 (d, *J* = 8.9 Hz), 110.1, 106.1 (d, *J* = 23.7 Hz), 54.9, 52.5, 43.7, 40.6, 35.3, 23.1, 22.1.

HRMS: Calculated for C<sub>20</sub>H<sub>20</sub>FNNaO (M+Na<sup>+</sup>): 332.1424, found 332.1421.

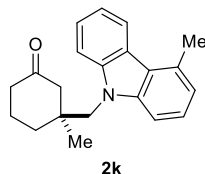

**(S)-3-methyl-3-((4-methyl-9H-carbazol-9-yl)methyl)cyclohexan-1-one 2k**

Prepared according to general procedure using 9-((dimethyl(phenyl)silyl)methyl)-4-methyl-9H-carbazole **4n** (0.15 mmol, 49.4 mg), 3-methyl-2-cyclohexenone (0.1 mmol, 11.0 mg), the aminocatalyst (*R,R*)-**3e** (0.02 mmol, 13.3 mg) salicylic acid (0.04 mmol, 5.5 mg) and 0.2 mL of CH<sub>3</sub>CN as the solvent. Time of irradiation: 48 hours. The crude mixture was purified by flash column chromatography (hexane/ethyl acetate: gradient from 10:1 to 4:1) to afford the product as a white solid (25.0 mg, 82% yield, 88% ee). The enantiomeric excess was determined to be 88% by HPLC analysis on a Daicel Chiralpak IC-3: 90/10 hexane/IPA, flow rate 1.0 mL/min, λ = 254 nm: τ<sub>Major</sub> = 17.2 min, τ<sub>Minor</sub> = 12.9 min. [α]<sub>D</sub><sup>26</sup> = +4.0 (c = 1.09, CHCl<sub>3</sub>, 88% ee). Absolute configuration determined in comparison to compound **2a**.

<sup>1</sup>H NMR (500 MHz, CDCl<sub>3</sub>): δ 8.21 (dt, *J* = 7.9, 0.9 Hz, 1H), 7.49-7.41 (m, 2H), 7.36 (dd, *J* = 8.3, 7.2 Hz, 1H), 7.30-7.25 (m, 2H), 7.04 (dt, *J* = 7.2, 0.9 Hz, 1H), 4.26-4.13 (q, *J* = 15.0 Hz, 2H), 2.90 (s, 3H), 2.50-2.46 (m, 1H), 2.38-2.18 (m, 2H), 2.13-2.03 (m, 1H), 2.01-1.91 (m, 1H), 1.91-1.76 (m, 3H), 1.13 (s, 3H).

<sup>13</sup>C NMR (126 MHz, CDCl<sub>3</sub>): δ 211.0, 142.1, 141.9, 133.6, 125.6, 125.2, 123.9, 122.8, 121.7, 121.1, 119.4, 109.6, 107.5, 54.7, 52.6, 43.8, 40.6, 35.3, 23.2, 22.1, 21.1.

HRMS: Calculated for C<sub>21</sub>H<sub>23</sub>NNaO (M+Na<sup>+</sup>): 328.1672, found 328.1674.

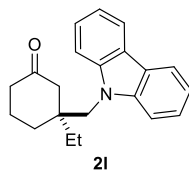

**(S)-3-((9H-carbazol-9-yl)methyl)-3-ethylcyclopentan-1-one 2l**

Prepared according to general procedure using 9-((dimethyl(phenyl)silyl)methyl)-9H-carbazole **4d** (0.15 mmol, 47.3 mg), 3-ethylcyclohex-2-en-1-one (0.1 mmol, 12.4 mg), the aminocatalyst (*R,R*)-**3e** (0.02 mmol, 13.3 mg), salicylic acid (0.04 mmol, 5.5 mg), and 0.2 mL of CH<sub>3</sub>CN as the solvent. Time of irradiation: 48 hours. The crude mixture was purified by flash column chromatography (DCM/ethyl acetate: gradient from 100:0 to 50:1) to afford the product as a white solid (23.2 mg, 76% yield, 67% ee). The enantiomeric excess was determined to be 67% by HPLC analysis on a Daicel Chiralpak IC-3: 90/10 hexane/IPA, flow rate 1.0 mL/min, λ = 254 nm: τ<sub>Major</sub> = 15.5 min, τ<sub>Minor</sub> = 12.5 min. [α]<sub>D</sub><sup>25</sup> = +3.92 (c = 1.09, CHCl<sub>3</sub>, 67% ee). Absolute configuration determined in comparison to compound **2a**.

<sup>1</sup>H NMR (500 MHz, CDCl<sub>3</sub>): δ 8.11 (d, *J* = 7.7 Hz, 2H), 7.46 (ddd, *J* = 8.3, 7.0, 1.2 Hz, 2H), 7.40 (d, *J* = 8.2 Hz, 2H), 7.26 (td, *J* = 7.8, 7.4, 1.0 Hz, 2H), 4.30 (d, *J* = 15.3 Hz, 1H), 4.11 (d, *J* = 15.3 Hz, 1H), 2.40 (s, 2H), 2.27-2.17 (m, 1H), 2.02-1.86 (m, 3H), 1.84-1.66 (m, 2H), 1.66-1.49 (m, 2H), 1.10 (t, *J* = 7.5 Hz, 3H).

<sup>13</sup>C NMR (126 MHz, CDCl<sub>3</sub>): δ 211.4, 142.1, 125.9, 123.3, 120.4, 119.5, 109.8, 51.8, 51.4, 45.8, 40.4, 31.6, 28.1, 21.5, 7.9. HRMS: Calculated for C<sub>21</sub>H<sub>23</sub>NNaO (M+Na<sup>+</sup>): 328.1672, found 328.1668.

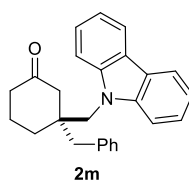

**(R)-3-((9H-carbazol-9-yl)methyl)-3-benzylcyclohexan-1-one 2m**

Prepared according to general procedure using 9-((dimethyl(phenyl)silyl)methyl)-9H-carbazole **4d** (0.15 mmol, 47.3 mg), 3-benzylcyclohex-2-en-1-one (0.1 mmol, 18.6 mg), the aminocatalyst (*R,R*)-**3e** (0.02 mmol, 13.3 mg), salicylic acid (0.04 mmol, 5.5 mg), and 0.2 mL of CH<sub>3</sub>CN as the solvent. Time of irradiation: 48 hours. The crude mixture was purified by flash column chromatography (DCM/ethyl acetate: gradient from 100:0 to 50:1) to afford the product as a white solid (22.0 mg, 60% yield, 50% ee). The enantiomeric excess was determined to be 50% by HPLC analysis on a Daicel Chiralpak IC-3: 90/10 hexane/IPA, flow rate 1.0 mL/min, λ = 254 nm: τ<sub>Major</sub> = 14.5 min, τ<sub>Minor</sub> = 13.7 min. [α]<sub>D</sub><sup>25</sup> = +37.2 (c = 0.12, CHCl<sub>3</sub>, 50% ee). Absolute configuration determined in comparison to compound **2a**.

**<sup>1</sup>H NMR** (500 MHz, CDCl<sub>3</sub>): δ 8.08 (dd, *J* = 7.7, 1.2 Hz, 2H), 7.46-7.37 (m, 4H), 7.36-7.29 (m, 3H), 7.29-7.20 (m, 2H), 7.19-7.14 (m, 2H), 4.31-4.07 (m, 2H), 2.99-2.75 (m, 2H), 2.60-2.46 (m, 1H), 2.39 (d, *J* = 13.4 Hz, 1H), 2.32-2.21 (m, 1H), 2.12-1.91 (m, 4H), 1.91-1.80 (m, 1H).

**<sup>13</sup>C NMR** (126 MHz, CDCl<sub>3</sub>): δ 211.6, 142.1, 136.5, 131.0, 128.7, 127.1, 125.9, 123.4, 120.4, 119.5, 109.8, 52.0, 50.1, 47.1, 42.3, 40.4, 33.2, 21.8.

**HRMS**: Calculated for C<sub>26</sub>H<sub>25</sub>NNaO (M+Na<sup>+</sup>): 390.1828, found 390.1809.

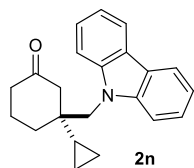

**(S)-3-((9H-carbazol-9-yl)methyl)-3-cyclopropylcyclohexan-1-one 2n**

Prepared according to general procedure using 9-((dimethyl(phenyl)silyl)methyl)-9H-carbazole **4d** (0.15 mmol, 47.3 mg), 3-cyclopropylcyclohex-2-en-1-one (0.1 mmol, 13.6 mg), the aminocatalyst (*R,R*)-**3e** (0.02 mmol, 13.3 mg), salicylic acid (0.04 mmol, 5.5 mg), and 0.2 mL of CH<sub>3</sub>CN as the solvent. Time of irradiation: 72 hours. The crude mixture was purified by flash column chromatography (hexane/ethyl acetate: gradient from 10:1 to 4:1) to afford the product as a colorless oil (24.8 mg, 78% yield, 56% ee). The enantiomeric excess was determined to be 56% by HPLC analysis on a Daicel Chiralpak IC-3: 90/10 hexane/IPA, flow rate 1.0 mL/min, λ = 215 nm: τ<sub>Major</sub> = 22.5 min, τ<sub>Minor</sub> = 13.1 min. [α]<sub>D</sub><sup>25</sup> = +2.0 (c = 1.20, CHCl<sub>3</sub>, 56% ee). Absolute configuration determined in comparison to compound **2a**

**<sup>1</sup>H NMR** (500 MHz, CDCl<sub>3</sub>): δ 8.10 (dt, *J* = 7.8, 1.0 Hz, 2H), 7.55-7.37 (m, 4H), 7.29-7.10 (m, 2H), 4.26-4.12 (m, 2H), 2.34-2.26 (m, 1H), 2.27-2.20 (m, 1H), 2.17-2.08 (m, 2H), 2.07-1.98 (m, 1H), 1.97-1.86 (m, 3H), 0.85-0.77 (m, 1H), 0.58-0.51 (m, 1H), 0.49-0.39 (m, 3H).

**<sup>13</sup>C NMR** (126 MHz, CDCl<sub>3</sub>): δ 211.8, 142.1, 125.8, 123.3, 120.4, 119.4, 109.9, 53.1, 46.6, 44.2, 40.6, 35.8, 21.3, 19.0, 2.9, -0.6.

**HRMS**: Calculated for C<sub>22</sub>H<sub>23</sub>NNaO (M+Na<sup>+</sup>): 340.1672, found 340.1688.

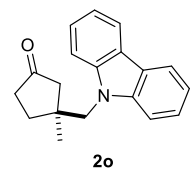

**(S)-3-((9H-carbazol-9-yl)methyl)-3-methylcyclopentan-1-one 2o**

Prepared according to general procedure using 9-((dimethyl(phenyl)silyl)methyl)-9H-carbazole **4d** (0.15 mmol, 47.3 mg), 3-methylcyclopent-2-en-1-one (0.1 mmol, 9.6 mg), the aminocatalyst (*R,R*)-**3e** (0.02 mmol, 13.3 mg), benzoic acid (0.04 mmol, 4.9 mg), and 0.2 mL of CH<sub>3</sub>CN as the solvent. Time of irradiation: 96 hours. The crude mixture was purified by flash column chromatography (DCM/ethyl acetate: gradient from 100:0 to 50:1) to afford the product as a white solid (12.5 mg, 45% yield, 74% ee). The enantiomeric excess was determined to be 74% ee by HPLC analysis on a Daicel Chiralpak ID-3: 90/10 hexane/IPA, flow rate 1.0 mL/min, λ = 254 nm: τ<sub>Major</sub> = 15.2 min, τ<sub>Minor</sub> = 12.0 min. [α]<sub>D</sub><sup>24</sup> = -4.0 (c = 0.63, CHCl<sub>3</sub>, 74% ee). Absolute configuration determined in comparison to compound **2a**.

**<sup>1</sup>H NMR** (500 MHz, CDCl<sub>3</sub>): δ 8.10 (dt, *J* = 7.8, 0.9 Hz, 2H), 7.46 (ddd, *J* = 8.3, 7.1, 1.2 Hz, 2H), 7.38 (dt, *J* = 8.3, 0.8 Hz, 2H), 7.26 (ddd, *J* = 7.9, 6.4, 1.0 Hz, 2H), 4.32 (s, 2H), 2.44-2.01 (m, 5H), 1.95-1.86 (m, 1H), 1.26 (s, 3H).

**<sup>13</sup>C NMR** (126 MHz, CDCl<sub>3</sub>): δ 217.7, 141.8, 126.0, 123.3, 120.5, 119.5, 109.4, 51.6, 50.7, 44.0, 36.5, 33.7, 25.0. **HRMS**: Calculated for C<sub>19</sub>H<sub>19</sub>NNaO (M+Na<sup>+</sup>): 300.1359, found 300.1368.

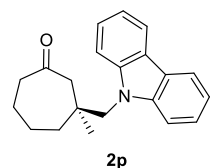

**(S)-3-((9H-carbazol-9-yl)methyl)-3-methylcycloheptan-1-one 2p**

Prepared according to general procedure using 9-((dimethyl(phenyl)silyl)methyl)-9H-carbazole **4d** (0.15 mmol, 47.3 mg), 3-methylcyclohept-2-en-1-one (0.1 mmol, 12.4 mg), the aminocatalyst (*R,R*)-**3e** (0.02 mmol, 13.3 mg), benzoic acid (0.04 mmol, 5.5 mg), and 0.2 mL of CH<sub>3</sub>CN as the solvent. Time of irradiation: 48 hours. The crude mixture was purified by flash column chromatography (DCM/ethyl acetate: gradient from 100:0 to 50:1) to afford the product as a colorless oil (22.6 mg, 74% yield, 95% ee). The enantiomeric excess was determined to be 95% by HPLC analysis on a Daicel Chiralpak IC-3: 90/10 hexane/IPA, flow rate 1.0 mL/min, λ = 254 nm: τ<sub>Major</sub> = 20.4 min, τ<sub>Minor</sub> = 14.0 min. [α]<sub>D</sub><sup>23</sup> = -3.2 (c = 0.87, CHCl<sub>3</sub>, 95% ee). Absolute configuration determined in comparison to compound **2a**.

$^1\text{H NMR}$  (500 MHz,  $\text{CDCl}_3$ ):  $\delta$  8.09 (d,  $J = 7.8$  Hz, 2H), 7.48-7.40 (m, 4H), 7.27-7.21 (m, 2H), 4.15 (s, 2H), 2.90 (d,  $J = 11.7$  Hz, 1H), 2.59-2.44 (m, 2H), 2.35 (ddd,  $J = 18.0, 11.5, 4.6$  Hz, 1H), 1.95-1.75 (m, 4H), 1.70-1.58 (m, 1H), 1.52-1.41 (m, 1H), 1.10 (s, 3H).

$^{13}\text{C NMR}$  (126 MHz,  $\text{CDCl}_3$ ):  $\delta$  212.9, 142.1, 125.7, 123.4, 120.3, 119.3, 110.1, 55.9, 53.4, 44.1, 41.7, 40.4, 24.3, 24.1, 23.7. **HRMS**: Calculated for  $\text{C}_{21}\text{H}_{23}\text{NNaO}$  ( $\text{M}+\text{Na}^+$ ): 328.1672, found 328.1666.

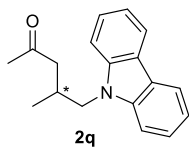

#### 5-(9H-carbazol-9-yl)-4-methylpentan-2-one **2q**

Prepared according to general procedure using 9-((dimethyl(phenyl)silyl)methyl)-9H-carbazole **4d** (0.15 mmol, 47.3 mg), (*E*)-pent-3-en-2-one (0.1 mmol, 8.4 mg), the aminocatalyst (*R,R*)-**3e** (0.02 mmol, 13.3 mg), salicylic acid (0.04 mmol, 5.5 mg), and 0.2 mL of  $\text{CH}_3\text{CN}$  as the solvent. Time of irradiation: 48 hours. The crude mixture was purified by flash column chromatography (hexane/ethyl acetate: gradient from 10:1 to 4:1) to afford the product as a colorless oil (20.6 mg, 78% yield, 55% ee). The enantiomeric excess was determined to be 55% by HPLC analysis on a Daicel Chiralpak IC-3: 90/10 hexane/IPA, flow rate 1.0 mL/min,  $\lambda = 254$  nm:  $\tau_{\text{Major}} = 9.0$  min,  $\tau_{\text{Minor}} = 10.1$  min.  $[\alpha]_{\text{D}}^{25} = +15.4$  ( $c = 0.10$ ,  $\text{CHCl}_3$ , 55% ee).

$^1\text{H NMR}$  (300 MHz,  $\text{CDCl}_3$ ):  $\delta$  8.10 (d,  $J = 7.8$  Hz, 2H), 7.54-7.39 (m, 4H), 7.33-7.16 (m, 2H), 4.28 (dd,  $J = 14.6, 6.9$  Hz, 1H), 4.07 (dd,  $J = 14.6, 8.0$  Hz, 1H), 2.81 (dq,  $J = 13.9, 6.8$  Hz, 1H), 2.61-2.33 (m, 2H), 2.08 (s, 3H), 0.99 (d,  $J = 6.8$  Hz, 3H).

$^{13}\text{C NMR}$  (101 MHz,  $\text{CDCl}_3$ ):  $\delta$  207.7, 140.9, 125.9, 123.0, 120.4, 119.1, 109.2, 48.7, 48.3, 30.6, 29.7, 18.5. **HRMS**: Calculated for  $\text{C}_{18}\text{H}_{20}\text{NO}$  ( $\text{M}+\text{H}^+$ ): 266.1539, found 266.1533.

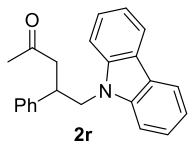

#### 5-(9H-carbazol-9-yl)-4-phenylpentan-2-one **2r**

Prepared according to general procedure using 9-((dimethyl(phenyl)silyl)methyl)-9H-carbazole **4d** (0.15 mmol, 47.3 mg), (*E*)-4-phenylbut-3-en-2-one (0.1 mmol, 8.4 mg), the aminocatalyst (*R,R*)-**3e** (0.02 mmol, 13.3 mg), salicylic acid (0.04 mmol, 5.5 mg), and 0.2 mL of  $\text{CH}_3\text{CN}$  as the solvent. Time of irradiation: 48 hours. The crude mixture was purified by flash column chromatography (hexane/ethyl acetate: gradient from 10:1 to 4:1) to afford the product as a colorless oil (21.9 mg, 68% yield, racemic). The enantiomeric excess was determined to be 0% by HPLC analysis on a Daicel Chiralpak IC-3: 90/10 hexane/IPA, flow rate 1.0 mL/min,  $\lambda = 215$  nm:  $\tau_1 = 10.5$  min,  $\tau_2 = 19.9$  min.

$^1\text{H NMR}$  (400 MHz,  $\text{CDCl}_3$ ):  $\delta$  8.06 (dt,  $J = 7.7, 1.0$  Hz, 2H), 7.40 (ddd,  $J = 8.3, 7.0, 1.2$  Hz, 2H), 7.32 (dt,  $J = 8.3, 0.9$  Hz, 2H), 7.25-7.11 (m, 7H), 4.54 (dd,  $J = 14.6, 7.5$  Hz, 1H), 4.33 (dd,  $J = 14.6, 7.3$  Hz, 1H), 3.93 (p,  $J = 7.2$  Hz, 1H), 2.96 (dd,  $J = 17.4, 6.9$  Hz, 1H), 2.85 (dd,  $J = 17.4, 7.2$  Hz, 1H), 2.01 (s, 3H).

$^{13}\text{C NMR}$  (101 MHz,  $\text{CDCl}_3$ ):  $\delta$  206.7, 141.7, 140.7, 128.9, 127.7, 127.3, 125.8, 122.9, 120.3, 119.1, 109.1, 49.4, 46.6, 40.7, 30.5. **HRMS**: Calculated for  $\text{C}_{23}\text{H}_{21}\text{NONa}$  ( $\text{M}+\text{Na}^+$ ): 350.1515, found 350.1519.

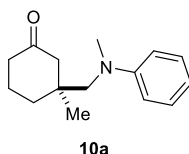

#### (*S*)-3-methyl-3-((methyl(phenyl)amino)methyl)cyclohexan-1-one **10a**

Prepared according to general procedure using *N*-((dimethyl(phenyl)silyl)methyl)-*N*-methylaniline **9a** (0.15 mmol, 38.3 mg), 3-methyl-2-cyclohexenone (0.1 mmol, 11.0 mg), the aminocatalyst (*R,R*)-**3e** (0.02 mmol, 13.3 mg), benzoic acid (0.04 mmol, 4.9 mg), and 0.2 mL of  $\text{CH}_3\text{CN}$  as the solvent. Time of irradiation: 48 hours. The crude mixture was purified by flash column chromatography (hexane/ethyl acetate: gradient from 10:1 to 4:1) to afford the product as a colorless oil (19.0 mg, 82% yield, 80% ee). The enantiomeric excess was determined to be 80% by HPLC analysis on a Daicel Chiralpak IC-3: 90/10 hexane/IPA, flow rate 1.0 mL/min,  $\lambda = 254$  nm:  $\tau_{\text{Major}} = 17.2$  min,  $\tau_{\text{Minor}} = 12.3$  min.  $[\alpha]_{\text{D}}^{25} = +35.2$  ( $c = 0.11$ ,  $\text{CHCl}_3$ , 80% ee). This compound is known, the spectroscopic data matched with previous report.<sup>1</sup>

$^1\text{H NMR}$  (500 MHz,  $\text{CDCl}_3$ ):  $\delta$  7.24-7.19 (m, 2H), 6.78-6.74 (m, 2H), 6.73-6.67 (m, 1H), 3.23 (d,  $J = 2.6$  Hz, 2H), 3.01 (s, 3H), 2.46 (d,  $J = 13.2$  Hz, 1H), 2.36-2.28 (m, 1H), 2.27-2.19 (m, 1H), 2.15 (dt,  $J = 13.2, 2.1$  Hz, 1H), 2.04-1.94 (m, 1H), 1.92-1.76 (m, 2H), 1.68-1.59 (m, 1H), 0.97 (s, 3H).

$^{13}\text{C NMR}$  (126 MHz,  $\text{CDCl}_3$ ):  $\delta$  211.9, 150.6, 129.1, 116.5, 112.2, 63.9, 52.3, 43.4, 42.2, 41.0, 34.9, 23.0, 22.3.

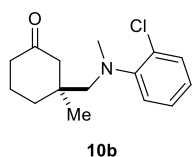

**(S)-3-(((2-chlorophenyl)(methyl)amino)methyl)-3-methylcyclohexan-1-one 10b**

Prepared according to general procedure using 2-chloro-*N*-((dimethyl(phenyl)silyl)methyl)-*N*-methylaniline **9b** (0.20 mmol, 58.0 mg), 3-methyl-2-cyclohexenone (0.1 mmol, 11.0 mg), the aminocatalyst (*R,R*)-**3e** (0.02 mmol, 13.3 mg), benzoic acid (0.04 mmol, 4.9 mg), and 0.2 mL of CH<sub>3</sub>CN as the solvent. Time of irradiation: 72 hours. The crude mixture was purified by flash column chromatography (hexane/ethyl acetate: gradient from 10:1 to 4:1) to afford the product as a colorless oil (16.6 mg, 62% yield, 63% ee). The enantiomeric excess was determined to be 63% by HPLC analysis on a Daicel Chiralpak IC-3: 95/5 hexane/IPA, flow rate 1.0 mL/min,  $\lambda = 254$  nm:  $\tau_{Major} = 12.8$  min,  $\tau_{Minor} = 12.3$  min.  $[\alpha]_D^{25} = +38.5$  ( $c = 0.11$ , CHCl<sub>3</sub>, 63% ee).

<sup>1</sup>H NMR (500 MHz, CDCl<sub>3</sub>):  $\delta$  7.35 (dd,  $J = 8.0, 1.5$  Hz, 1H), 7.24 (dd,  $J = 8.1, 1.6$  Hz, 1H), 7.18 (td,  $J = 7.7, 1.5$  Hz, 1H), 7.01-6.92 (m, 1H), 3.04 (d,  $J = 1.4$  Hz, 2H), 2.82 (s, 3H), 2.43 (d,  $J = 13.4$  Hz, 1H), 2.31-2.16 (m, 2H), 1.97 (dt,  $J = 13.4, 1.8$  Hz, 1H), 1.90-1.68 (m, 3H), 1.46-1.34 (m, 1H), 0.87 (s, 3H).

<sup>13</sup>C NMR (126 MHz, CDCl<sub>3</sub>):  $\delta$  212.7, 151.7, 131.3, 130.8, 127.7, 125.0, 124.6, 66.1, 51.6, 47.0, 43.0, 41.1, 33.9, 23.4, 22.3.

**HRMS:** Calculated for C<sub>15</sub>H<sub>20</sub>ClNNaO (M+Na<sup>+</sup>): 288.1126, found 288.1119.

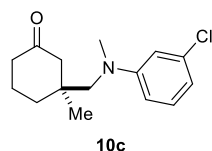

**(S)-3-(((3-chlorophenyl)(methyl)amino)methyl)-3-methylcyclohexan-1-one 10c**

Prepared according to general procedure using 3-chloro-*N*-((dimethyl(phenyl)silyl)methyl)-*N*-methylaniline **9c** (0.15 mmol, 43.4 mg), 3-methyl-2-cyclohexenone (0.1 mmol, 11.0 mg), the aminocatalyst (*R,R*)-**3e** (0.02 mmol, 13.3 mg), benzoic acid (0.04 mmol, 4.9 mg), and 0.2 mL of CH<sub>3</sub>CN as the solvent. Time of irradiation: 48 hours. The crude mixture was purified by flash column chromatography (hexane/ethyl acetate: gradient from 10:1 to 4:1) to afford the product as a colorless oil (21.0 mg, 79% yield, 84% ee). The enantiomeric excess was determined to be 84% by HPLC analysis on a Daicel Chiralpak IC-3: 90/10 hexane/IPA, flow rate 1.0 mL/min,  $\lambda = 254$  nm:  $\tau_{Major} = 15.5$  min,  $\tau_{Minor} = 11.9$  min.  $[\alpha]_D^{25} = +30.9$  ( $c = 0.10$ , CHCl<sub>3</sub>, 84% ee).

<sup>1</sup>H NMR (500 MHz, CDCl<sub>3</sub>):  $\delta$  7.10 (dd,  $J = 8.5, 7.8$  Hz, 1H), 6.70 (dd,  $J = 2.6, 1.9$  Hz, 1H), 6.66 (ddd,  $J = 7.8, 1.9, 0.8$  Hz, 1H), 6.61 (ddd,  $J = 8.5, 2.7, 0.8$  Hz, 1H), 3.26-3.17 (m, 2H), 3.00 (s, 3H), 2.44-2.37 (m, 1H), 2.35-2.29 (m, 1H), 2.27-2.19 (m, 1H), 2.14 (dt,  $J = 13.2, 2.1$  Hz, 1H), 2.04-1.94 (m, 1H), 1.91-1.73 (m, 2H), 1.66-1.61 (m, 1H), 0.96 (s, 3H).

<sup>13</sup>C NMR (126 MHz, CDCl<sub>3</sub>):  $\delta$  211.5, 151.6, 135.1, 130.0, 116.4, 112.2, 110.4, 63.6, 52.2, 43.4, 42.2, 40.9, 35.0, 23.0, 22.2. **HRMS:** Calculated for C<sub>15</sub>H<sub>21</sub>NOCl (M+H<sup>+</sup>): 358.1802, found 358.1804.

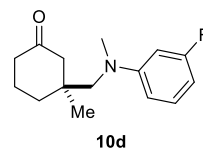

**(S)-3-(((3-fluorophenyl)(methyl)amino)methyl)-3-methylcyclohexan-1-one 10d**

Prepared according to general procedure using 3-fluoro-*N*-((dimethyl(phenyl)silyl)methyl)-*N*-methylaniline **9d** (0.15 mmol, 41.0 mg), 3-methyl-2-cyclohexenone (0.1 mmol, 11.0 mg), the aminocatalyst (*R,R*)-**3e** (0.02 mmol, 13.3 mg), benzoic acid (0.04 mmol, 4.9 mg), and 0.2 mL of CH<sub>3</sub>CN as the solvent. Time of irradiation: 48 hours. The crude mixture was purified by flash column chromatography (hexane/ethyl acetate: gradient from 10:1 to 4:1) to afford the product as a colorless oil (20.2 mg, 81% yield, 79% ee). The enantiomeric excess was determined to be 79% by HPLC analysis on a Daicel Chiralpak IC-3: 90/10 hexane/IPA, flow rate 1.0 mL/min,  $\lambda = 254$  nm:  $\tau_{Major} = 16.6$  min,  $\tau_{Minor} = 12.8$  min.  $[\alpha]_D^{25} = +24.3$  ( $c = 0.11$ , CHCl<sub>3</sub>, 79% ee).

<sup>1</sup>H NMR (500 MHz, CDCl<sub>3</sub>):  $\delta$  7.13 (td,  $J = 8.2, 7.2$  Hz, 1H), 6.51-6.47 (m, 1H), 6.44-6.35 (m, 2H), 3.22 (d,  $J = 1.9$  Hz, 2H), 3.00 (s, 3H), 2.42 (d,  $J = 13.2$  Hz, 1H), 2.35-2.29 (m, 1H), 2.27-2.19 (m, 1H), 2.14 (dt,  $J = 13.2, 2.1$  Hz, 1H), 2.04-1.95 (m, 1H), 1.92-1.74 (m, 2H), 1.65-1.60 (m, 1H), 0.96 (s, 3H).

<sup>13</sup>C NMR (126 MHz, CDCl<sub>3</sub>):  $\delta$  211.6, 164.1 (d,  $J = 241.6$  Hz), 152.3 (d,  $J = 10.6$  Hz), 130.1 (d,  $J = 10.5$  Hz), 107.9 (d,  $J = 2.2$  Hz), 103.0 (d,  $J = 21.7$  Hz), 99.4 (d,  $J = 26.4$  Hz), 63.8, 52.2, 43.3, 42.2, 40.9, 35.0, 23.0, 22.2. <sup>19</sup>F NMR (376 MHz, CDCl<sub>3</sub>):  $\delta$  -112.6.

**HRMS:** Calculated for C<sub>15</sub>H<sub>20</sub>FNNaO (M+Na<sup>+</sup>): 272.1421, found 272.1419.

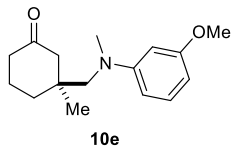

**(S)-3-(((3-methoxyphenyl)(methyl)amino)methyl)-3-methylcyclohexan-1-one**

**10e**

Prepared according to general procedure using *N*-((dimethyl(phenyl)silyl)methyl)-3-methoxy-*N*-methylaniline **9e** (0.20 mmol, 57.1 mg), 3-methyl-2-cyclohexenone (0.1 mmol, 11.0 mg), the aminocatalyst (*R,R*)-**3e** (0.02 mmol, 13.3 mg), benzoic acid (0.04 mmol, 4.9 mg), and 0.2 mL of CH<sub>3</sub>CN as the solvent. Time of irradiation: 72 hours.

The crude mixture was purified by flash column chromatography (hexane/ethyl acetate: gradient from 10:1 to 4:1) to afford the product as a colorless oil (18.6 mg, 71% yield, 83% ee). The enantiomeric excess was determined to be 83% by HPLC analysis on a Daicel Chiralpak IC-3: 85/15 hexane/IPA, flow rate 1.0 mL/min,  $\lambda = 254$  nm:  $\tau_{Major} = 22.9$  min,  $\tau_{Minor} = 15.0$  min.  $[\alpha]_D^{25} = +27.6$  ( $c = 0.11$ , CHCl<sub>3</sub>, 83% ee).

<sup>1</sup>H NMR (500 MHz, CDCl<sub>3</sub>):  $\delta$  7.12 (t,  $J = 8.2$  Hz, 1H), 6.39 (dd,  $J = 8.4, 2.5$  Hz, 1H), 6.34-6.23 (m, 2H), 3.79 (s, 3H), 3.21 (d,  $J = 2.3$  Hz, 2H), 3.00 (s, 3H), 2.44 (d,  $J = 13.2$  Hz, 1H), 2.34-2.26 (m, 1H), 2.27-2.18 (m, 1H), 2.14 (d,  $J = 13.2$  Hz, 1H), 2.04-1.92 (m, 1H), 1.90-1.75 (m, 2H), 1.67-1.52 (m, 1H), 0.96 (s, 3H).  
<sup>13</sup>C NMR (126 MHz, CDCl<sub>3</sub>):  $\delta$  211.8, 160.7, 152.0, 129.8, 105.6, 101.1, 99.2, 63.9, 55.3, 52.3, 43.3, 42.2, 41.0, 34.9, 23.0, 22.3.

HRMS: Calculated for C<sub>16</sub>H<sub>23</sub>NNaO<sub>2</sub> (M+Na<sup>+</sup>): 284.1621, found 284.1615.

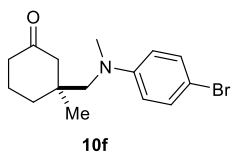

**(S)-3-(((4-bromophenyl)(methyl)amino)methyl)-3-methylcyclohexan-1-one**

**10f**

Prepared according to general procedure using 4-bromo-*N*-((dimethyl(phenyl)silyl)methyl)-*N*-methylaniline **9f** (0.15 mmol, 50.1 mg), 3-methyl-2-cyclohexenone (0.1 mmol, 11.0 mg), the aminocatalyst (*R,R*)-**3e** (0.02 mmol, 13.3 mg), benzoic acid (0.04 mmol, 4.9 mg), and 0.2 mL of CH<sub>3</sub>CN as the solvent. Time

of irradiation: 48 hours. The crude mixture was purified by flash column chromatography (hexane/ethyl acetate: gradient from 10:1 to 4:1) to afford the product as a colorless oil (25.7 mg, 83% yield, 80% ee). The enantiomeric excess was determined to be 80% ee by HPLC analysis on a Daicel Chiralpak IC-3: 90/10 hexane/IPA, flow rate 1.0 mL/min,  $\lambda = 254$  nm:  $\tau_{Major} = 21.6$  min,  $\tau_{Minor} = 15.3$  min.  $[\alpha]_D^{25} = +31.4$  ( $c = 0.10$ , CHCl<sub>3</sub>, 80% ee). This compound is known, the spectroscopic data matched with previous report.<sup>1</sup>

<sup>1</sup>H NMR (500 MHz, CDCl<sub>3</sub>):  $\delta$  7.33-7.17 (m, 2H), 6.66-6.52 (m, 2H), 3.20 (d,  $J = 1.0$  Hz, 2H), 2.98 (s, 3H), 2.40 (d,  $J = 13.2$  Hz, 1H), 2.35-2.28 (m, 1H), 2.27-2.19 (m, 1H), 2.13 (dt,  $J = 13.2, 2.1$  Hz, 1H), 2.03-1.93 (m, 1H), 1.92-1.72 (m, 2H), 1.66-1.56 (m, 1H), 0.95 (s, 3H).

<sup>13</sup>C NMR (126 MHz, CDCl<sub>3</sub>):  $\delta$  211.6, 149.5, 131.7, 113.9, 108.4, 63.8, 52.2, 43.4, 42.3, 40.9, 35.0, 23.1, 22.2.

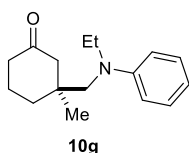

**(S)-3-((ethyl(phenyl)amino)methyl)-3-methylcyclohexan-1-one**

**10g**

Prepared according to general procedure using *N*-((dimethyl(phenyl)silyl)methyl)-*N*-ethylaniline **9g** (0.15 mmol, 40.4 mg), 3-methyl-2-cyclohexenone (0.1 mmol, 11.0 mg), the aminocatalyst (*R,R*)-**3e** (0.02 mmol, 13.3 mg), benzoic acid (0.04 mmol, 4.9 mg), and 0.2 mL of CH<sub>3</sub>CN as the solvent. Time of irradiation: 48 hours. The crude mixture was purified by flash column chromatography (hexane/ethyl acetate: gradient from 10:1 to

4:1) to afford the product as a colorless oil (14.0 mg, 57% yield, 79% ee). The enantiomeric excess was determined to be 79% by HPLC analysis on a Daicel Chiralpak IC-3: 90/10 hexane/IPA, flow rate 1.0 mL/min,  $\lambda = 254$  nm:  $\tau_{Major} = 12.5$  min,  $\tau_{Minor} = 10.4$  min.  $[\alpha]_D^{25} = +33.0$  ( $c = 0.10$ , CHCl<sub>3</sub>, 79% ee).

<sup>1</sup>H NMR (500 MHz, CDCl<sub>3</sub>):  $\delta$  7.24-7.14 (m, 2H), 6.80-6.76 (m, 2H), 6.68 (tt,  $J = 7.2, 1.0$  Hz, 1H), 3.42 (q,  $J = 6.9$  Hz, 2H), 3.16 (d,  $J = 1.7$  Hz, 2H), 2.48-2.43 (m, 1H), 2.34-2.27 (m, 1H), 2.26-2.18 (m, 1H), 2.13 (dt,  $J = 13.2, 2.1$  Hz, 1H), 2.01-1.92 (m, 1H), 1.90-1.77 (m, 2H), 1.60-1.55 (m, 1H), 1.09 (t,  $J = 6.9$  Hz, 3H), 0.96 (s, 3H).

<sup>13</sup>C NMR (126 MHz, CDCl<sub>3</sub>):  $\delta$  212.0, 148.9, 129.0, 116.4, 113.5, 61.0, 52.1, 47.1, 43.0, 40.8, 34.7, 22.9, 22.2, 10.6. HRMS: Calculated for C<sub>16</sub>H<sub>24</sub>NO (M+H<sup>+</sup>): 246.1852, found 246.1851.

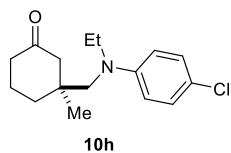

**(S)-3-(((4-chlorophenyl)(ethyl)amino)methyl)-3-methylcyclohexan-1-one 10h**

Prepared according to general procedure using 4-chloro-*N*-((dimethyl(phenyl)silyl)methyl)-*N*-ethylaniline **9h** (0.15 mmol, 45.6 mg), 3-methyl-2-cyclohexenone (0.1 mmol, 11.0 mg), the aminocatalyst (*R,R*)-**3e** (0.02 mmol, 13.3 mg), benzoic acid (0.04 mmol, 4.9 mg), and 0.2 mL of CH<sub>3</sub>CN as the solvent. Time of irradiation: 48 hours. The crude mixture was purified by flash column chromatography (hexane/ethyl acetate: gradient from 10:1 to 4:1) to afford the product as a colorless oil (22.2 mg, 79% yield, 81% ee). The enantiomeric excess was determined to be 81% by HPLC analysis on a Daicel Chiralpak IC-3: 90/10 hexane/IPA, flow rate 1.0 mL/min,  $\lambda = 254$  nm:  $\tau_{Major} = 15.3$  min,  $\tau_{Minor} = 12.2$  min.  $[\alpha]_D^{25} = +33.8$  ( $c = 0.11$ , CHCl<sub>3</sub>, 81% ee).

**<sup>1</sup>H NMR** (500 MHz, CDCl<sub>3</sub>):  $\delta$  7.17-7.06 (m, 2H), 6.72-6.65 (m, 2H), 3.39 (q,  $J = 7.0$  Hz, 2H), 3.13 (d,  $J = 3.3$  Hz, 2H), 2.47-2.38 (m, 1H), 2.35-2.27 (m, 1H), 2.26-2.18 (m, 1H), 2.10 (dt,  $J = 13.2, 2.1$  Hz, 1H), 2.00-1.92 (m, 1H), 1.90-1.72 (m, 2H), 1.60-1.53 (m, 1H), 1.07 (t,  $J = 7.0$  Hz, 3H), 0.94 (s, 3H).

**<sup>13</sup>C NMR** (126 MHz, CDCl<sub>3</sub>):  $\delta$  211.8, 147.6, 128.9, 121.3, 114.9, 61.2, 52.2, 47.5, 43.2, 40.9, 34.9, 23.1, 22.2, 10.7.

**HRMS**: Calculated for C<sub>16</sub>H<sub>23</sub>ClNO (M+H<sup>+</sup>): 280.1463, found 280.1472.

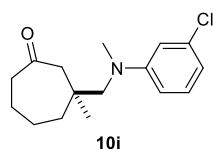

**(S)-3-(((3-chlorophenyl)(methyl)amino)methyl)-3-methylcycloheptan-1-one 10i**

Prepared according to general procedure using *N*-((dimethyl(phenyl)silyl)methyl)-3-chloro-*N*-methylaniline **9c** (0.15 mmol, 43.5 mg), 3-methyl-2-cyclohexenone (0.1 mmol, 11.0 mg), the aminocatalyst (*R,R*)-**3e** (0.02 mmol, 13.3 mg), benzoic acid (0.04 mmol, 4.9 mg), and 0.2 mL of CH<sub>3</sub>CN as the solvent. Time of irradiation: 48 hours. The crude mixture was purified by flash column chromatography (hexane/ethyl acetate: gradient from 10:1 to 4:1) to afford the product as a colorless oil (22.1 mg, 79% yield, 93% ee). The enantiomeric excess was determined to be 93% by HPLC analysis on a Daicel Chiralpak IC-3: 90/10 hexane/IPA, flow rate 1.0 mL/min,  $\lambda = 254$  nm:  $\tau_{Major} = 12.95$  min,  $\tau_{Minor} = 11.14$  min.  $[\alpha]_D^{25} = +26.5$  ( $c = 0.12$ , CHCl<sub>3</sub>, 93% ee).

**<sup>1</sup>H NMR** (500 MHz, CDCl<sub>3</sub>):  $\delta$  7.10 (t,  $J = 8.2$  Hz, 1H), 6.73-6.70 (m, 1H), 6.67-6.60 (m, 2H), 3.31-3.10 (m, 2H), 3.00 (s, 3H), 2.76-2.71 (m, 1H), 2.55-2.45 (m, 1H), 2.42-2.30 (m, 2H), 1.94-1.80 (m, 2H), 1.76-1.59 (m, 3H), 1.56-1.45 (m, 1H), 0.96 (s, 3H).

**<sup>13</sup>C NMR** (126 MHz, CDCl<sub>3</sub>):  $\delta$  213.4, 151.6, 135.1, 130.0, 116.3, 112.3, 110.6, 64.5, 53.0, 44.1, 42.3, 41.2, 39.9, 24.4, 24.3, 23.5.

**HRMS**: Calculated for C<sub>16</sub>H<sub>22</sub>ClNNaO (M+Na<sup>+</sup>): 302.1282, found 302.1287.

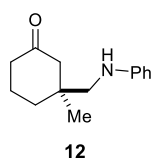

**(S)-3-methyl-3-((phenylamino)methyl)cyclohexan-1-one 12**

Prepared according to general procedure using phenylglycine **11** (0.20 mmol, 30.4 mg), 3-methyl-2-cyclohexenone (0.1 mmol, 11.0 mg), the aminocatalyst (*R,R*)-**3e** (0.02 mmol, 13.3 mg), benzoic acid (0.04 mmol, 4.9 mg), and 0.2 mL of CH<sub>3</sub>CN as the solvent. Time of irradiation: 48 hours. The crude mixture was purified by flash column chromatography (hexane/ethyl acetate: gradient from 10:1 to 4:1) to afford the product as a yellow oil. (13.3 mg, 61% yield, 47% ee). The enantiomeric excess was determined to be 47% by HPLC analysis on a Daicel Chiralpak IC-3: 90/10 hexane/IPA, flow rate 1.0 mL/min,  $\lambda = 254$  nm:  $\tau_{Major} = 15.3$  min,  $\tau_{Minor} = 21.6$  min.  $[\alpha]_D^{25} = -10.6$  ( $c = 0.14$ , CHCl<sub>3</sub>, 47% ee). Absolute configuration determined in comparison to compound **2a**.

This compound is known, the spectroscopic data matched with previous report.<sup>8</sup>

**<sup>1</sup>H NMR** (300 MHz, CDCl<sub>3</sub>):  $\delta$  7.22-7.10 (m, 2H), 6.76-6.59 (m, 3H), 3.72 (s, br, 1H), 3.02 (d,  $J = 2.5$  Hz, 2H), 2.47-2.25 (m, 3H), 2.20-2.10 (m, 1H), 1.99-1.72 (m, 3H), 1.69-1.52 (m, 1H), 1.02 (s, 3H).

**<sup>13</sup>C NMR** (126 MHz, CDCl<sub>3</sub>):  $\delta$  211.6, 148.6, 129.4, 117.7, 113.0, 54.3, 51.7, 41.0, 40.5, 34.1, 23.6, 22.1.

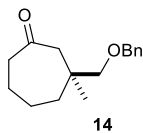

### (S)-3-methyl-3-((phenylamino)methyl)cycloheptan-1-one **14**

Prepared according to general procedure using diethyl 4-((benzyloxy)methyl)-2,6-dimethyl-1,4-dihydropyridine-3,5-dicarboxylate **13** (0.30 mmol, 112.0 mg), 3-methylcyclohept-2-en-1-one (0.1 mmol, 12.4 mg), the aminocatalyst (*R,R*)-**3d** (0.02 mmol, 11.0 mg), benzoic acid (0.08 mmol, 9.8 mg), and 0.2 mL of CH<sub>3</sub>CN as the solvent. Time of irradiation: 4 days. The crude mixture was purified by flash column chromatography (hexane/ethyl acetate: gradient from 10:1 to 4:1) to afford the product as a colorless oil. (10.3 mg, 42% yield, 43% ee). The enantiomeric excess was determined to be 43% by HPLC analysis on a Daicel Chiralpak IC-3: 90/10 hexane/IPA, flow rate 1.0 mL/min,  $\lambda = 215$  nm:  $\tau_{Major} = 10.56$  min,  $\tau_{Minor} = 10.02$  min.  $[\alpha]_D^{25} = -10.0$  (c = 0.11, CHCl<sub>3</sub>, 43% ee). Absolute configuration determined in comparison to compound **2a**.

<sup>1</sup>H NMR (300 MHz, CDCl<sub>3</sub>):  $\delta$  7.38-7.22 (m, 5H), 4.49 (s, 2H), 3.16 (d,  $J = 1.3$  Hz, 2H), 2.76-2.68 (m, 1H), 2.56-2.23 (m, 3H), 1.85-1.68 (m, 4H), 1.55-1.50 (m, 2H), 0.93 (s, 3H).

<sup>13</sup>C NMR (126 MHz, CDCl<sub>3</sub>):  $\delta$  214.2, 138.7, 128.5, 127.6, 127.6, 80.1, 73.4, 52.3, 44.2, 39.7, 37.1, 29.9, 24.6, 24.3, 23.1.

**HRMS:** Calculated for C<sub>16</sub>H<sub>22</sub>NaO<sub>2</sub> (M+Na<sup>+</sup>): 269.1512, found 269.1520.

## Supplementary References

- Murphy, J. J., Bastida, D., Paria, S., Fagnoni, M. & Melchiorre, P. Asymmetric catalytic formation of quaternary carbons by iminium ion trapping of radicals. *Nature* **532**, 218-222 (2016).
- Barer, T. E., Walker, S. D., Martinelli, J. R. & Buchwald, S. L. Catalysts for Suzuki–Miyaura coupling processes: scope and studies of the effect of ligand structure. *J. Am. Chem. Soc.* **127**, 4685-4696 (2005).
- Hörmann, F. M., Chung, T. S., Rodriguez, E., Jakob, M. & Bach, T. Evidence for triplet sensitization in the visible-light-induced [2+2] photocycloaddition of eniminium ions. *Angew. Chem., Int. Ed.* **57**, 827-831 (2018).
- Kehrli, S., Martin, D., Rix, D., Mauduit, M. & Alexakis, A. Formation of quaternary chiral centers by N-heterocyclic carbene-Cu-catalyzed asymmetric conjugate addition reactions with Grignard reagents on trisubstituted cyclic enones. *Chem. Eur. J.* **16**, 9890-9904 (2010).
- Mueller, D. & Alexakis, A. Formation of quaternary stereogenic centers by copper-catalyzed asymmetric conjugate addition reactions of alkenylaluminums to trisubstituted enones. *Chem. Eur. J.* **19**, 15226-15239 (2013).
- Bahamonda, A., Murphy, J. J., Savarese, M., Brémond, É., Cavalli, A. & Melchiorre P. Studies on the enantioselective iminium ion trapping of radicals triggered by an electron-relay mechanism. *J. Am. Chem. Soc.* **139**, 4559-4567 (2017).
- Verrier, C., Alandini, N., Pezzetta, C., Moliterno, M., Buzzetti, L., Hepburn, H. B., Vega-Peñaloza, Silvi, M. & Melchiorre, P. Direct stereoselective installation of alkyl fragments at the  $\beta$ -carbon of enals via excited iminium ion catalysis. *ACS Catal.* **8**, 1062-1066 (2018).
- Millet, A., Lefebvre, Q. & Rueping, M. Visible-light photoredox-catalyzed Giese reaction: decarboxylative addition of amino acid derived  $\alpha$ -amino radicals to electron-deficient olefins. *Chem. Eur. J.* **22**, 13464-13468 (2016).
